# Supplementary material
Source: publisher site journal article supplement (https://www.dovepress.com/get_supplementary_file.php?f=supplementary_file_8_51969.pdf)
Supplement: Supplementary file 1 [file get_supplementary_file.php]

**Table S8. Identification of putative miR-663 target sites predicted by TargetScan**

| Target gene | Representative transcript | Gene name                                                                                                                    | Conserved sites |      |         |         | Poorly conserved sites |      |         |         | Representative miRNA | Total context+ score | Aggregate PCT | Links to sites in UTRs |
|-------------|---------------------------|------------------------------------------------------------------------------------------------------------------------------|-----------------|------|---------|---------|------------------------|------|---------|---------|----------------------|----------------------|---------------|------------------------|
|             |                           |                                                                                                                              | total           | 8mer | 7mer-m8 | 7mer-1A | total                  | 8mer | 7mer-m8 | 7mer-1A |                      |                      |               |                        |
| ABO         | NM_020469                 | ABO blood group (transferase A, alpha 1-3-N-acetylgalactosaminyltransferase; transferase B, alpha 1-3-galactosyltransferase) | 0               | 0    | 0       | 0       | 3                      | 3    | 0       | 0       | hsa-miR-663          | -1.61                | N/A           | Sites in UTR           |
| MDGA1       | NM_153487                 | MAM domain containing glycosylphosphatidylinositol anchor 1                                                                  | 1               | 1    | 0       | 0       | 4                      | 2    | 0       | 2       | hsa-miR-1908         | -1.49                | N/A           | Sites in UTR           |
| C1orf86     | NM_182533                 | chromosome 1 open reading frame 86                                                                                           | 0               | 0    | 0       | 0       | 4                      | 2    | 2       | 0       | hsa-miR-663          | -1.48                | N/A           | Sites in UTR           |
| NFIX        | NM_002501                 | nuclear factor I/X (CCAAT-binding transcription factor)                                                                      | 0               | 0    | 0       | 0       | 9                      | 0    | 9       | 0       | hsa-miR-663          | -1.32                | N/A           | Sites in UTR           |
| STK11       | NM_000455                 | serine/threonine kinase 11                                                                                                   | 0               | 0    | 0       | 0       | 4                      | 2    | 2       | 0       | hsa-miR-663          | -1.27                | N/A           | Sites in UTR           |
| ZFR2        | NM_001145640              | zinc finger RNA binding protein 2                                                                                            | 0               | 0    | 0       | 0       | 5                      | 0    | 5       | 0       | hsa-miR-663          | -1.25                | N/A           | Sites in UTR           |
| KIAA0415    | NM_014855                 | KIAA0415                                                                                                                     | 0               | 0    | 0       | 0       | 8                      | 2    | 4       | 2       | hsa-miR-663          | -1.24                | N/A           | Sites in UTR           |
| PCSK1N      | NM_013271                 | proprotein convertase subtilisin/kexin type 1 inhibitor                                                                      | 0               | 0    | 0       | 0       | 3                      | 2    | 0       | 1       | hsa-miR-663          | -1.23                | N/A           | Sites in UTR           |
| GJD3        | NM_152219                 | gap junction protein, delta 3, 31.9kDa                                                                                       | 0               | 0    | 0       | 0       | 4                      | 2    | 2       | 0       | hsa-miR-663          | -1.2                 | N/A           | Sites in UTR           |
| ABCD1       | NM_000033                 | ATP-binding cassette, sub-family D (ALD), member 1                                                                           | 0               | 0    | 0       | 0       | 4                      | 1    | 3       | 0       | hsa-miR-663          | -1.17                | N/A           | Sites in UTR           |
| PRSS22      | NM_022119                 | protease, serine, 22                                                                                                         | 0               | 0    | 0       | 0       | 5                      | 0    | 5       | 0       | hsa-miR-1908         | -1.16                | N/A           | Sites in UTR           |
| DPF1        | NM_001135155              | D4, zinc and double PHD fingers family 1                                                                                     | 1               | 0    | 1       | 0       | 4                      | 1    | 3       | 0       | hsa-miR-663          | -1.15                | N/A           | Sites in UTR           |
| FKBP8       | NM_012181                 | FK506 binding protein 8, 38kDa                                                                                               | 0               | 0    | 0       | 0       | 3                      | 1    | 2       | 0       | hsa-miR-663          | -1.11                | N/A           | Sites in UTR           |
| CLSTN1      | NM_001009566              | calsyntenin 1                                                                                                                | 0               | 0    | 0       | 0       | 4                      | 1    | 3       | 0       | hsa-miR-663          | -1.1                 | N/A           | Sites in UTR           |
| ARAF        | NM_001654                 | v-raf murine sarcoma 3611 viral oncogene homolog                                                                             | 0               | 0    | 0       | 0       | 3                      | 2    | 1       | 0       | hsa-miR-1908         | -1.1                 | N/A           | Sites in UTR           |
| PABPC1L2A   | NM_001012977              | poly(A) binding protein, cytoplasmic 1-like 2A                                                                               | 0               | 0    | 0       | 0       | 3                      | 1    | 2       | 0       | hsa-miR-663          | -1.04                | N/A           | Sites in UTR           |
| PABPC1L2B   | NM_001042506              | poly(A) binding protein, cytoplasmic 1-like 2B                                                                               | 0               | 0    | 0       | 0       | 3                      | 1    | 2       | 0       | hsa-miR-663          | -1.04                | N/A           | Sites in UTR           |

|          |              |                                                                 |   |   |   |   |   |   |   |   |              |       |     |              |
|----------|--------------|-----------------------------------------------------------------|---|---|---|---|---|---|---|---|--------------|-------|-----|--------------|
| HSPG2    | NM_005529    | heparan sulfate proteoglycan 2                                  | 1 | 1 | 0 | 0 | 2 | 0 | 2 | 0 | hsa-miR-663  | -1.03 | N/A | Sites in UTR |
| HDAC10   | NM_001159286 | histone deacetylase 10                                          | 0 | 0 | 0 | 0 | 4 | 0 | 4 | 0 | hsa-miR-1908 | -1.02 | N/A | Sites in UTR |
| NRARP    | NM_001004354 | NOTCH-regulated ankyrin repeat protein                          | 0 | 0 | 0 | 0 | 4 | 1 | 2 | 1 | hsa-miR-663  | -1    | N/A | Sites in UTR |
| TNFRSF4  | NM_003327    | tumor necrosis factor receptor superfamily, member 4            | 0 | 0 | 0 | 0 | 2 | 2 | 0 | 0 | hsa-miR-663  | -0.97 | N/A | Sites in UTR |
| MMP25    | NM_022468    | matrix metalloproteinase 25                                     | 0 | 0 | 0 | 0 | 4 | 1 | 3 | 0 | hsa-miR-663  | -0.96 | N/A | Sites in UTR |
| ST3GAL2  | NM_006927    | ST3 beta-galactoside alpha-2,3-sialyltransferase 2              | 1 | 1 | 0 | 0 | 2 | 0 | 1 | 1 | hsa-miR-663  | -0.96 | N/A | Sites in UTR |
| GRIN2D   | NM_000836    | glutamate receptor, ionotropic, N-methyl D-aspartate 2D         | 2 | 1 | 1 | 0 | 1 | 0 | 1 | 0 | hsa-miR-663  | -0.96 | N/A | Sites in UTR |
| SCRT1    | NM_031309    | scratch homolog 1, zinc finger protein (Drosophila)             | 0 | 0 | 0 | 0 | 7 | 0 | 6 | 1 | hsa-miR-663  | -0.95 | N/A | Sites in UTR |
| CMIP     | NM_030629    | c-Maf-inducing protein                                          | 0 | 0 | 0 | 0 | 4 | 1 | 3 | 0 | hsa-miR-663  | -0.95 | N/A | Sites in UTR |
| PRRT1    | NM_030651    | proline-rich transmembrane protein 1                            | 1 | 0 | 1 | 0 | 2 | 0 | 2 | 0 | hsa-miR-663  | -0.9  | N/A | Sites in UTR |
| SLC22A13 | NM_004256    | solute carrier family 22 (organic anion transporter), member 13 | 0 | 0 | 0 | 0 | 3 | 0 | 3 | 0 | hsa-miR-663  | -0.89 | N/A | Sites in UTR |
| DLGAP4   | NM_001042486 | discs, large (Drosophila) homolog-associated protein 4          | 0 | 0 | 0 | 0 | 3 | 2 | 1 | 0 | hsa-miR-663  | -0.88 | N/A | Sites in UTR |
| CYTH1    | NM_004762    | cytohesin 1                                                     | 0 | 0 | 0 | 0 | 3 | 1 | 2 | 0 | hsa-miR-663  | -0.87 | N/A | Sites in UTR |
| PPP5C    | NM_001204284 | protein phosphatase 5, catalytic subunit                        | 0 | 0 | 0 | 0 | 3 | 1 | 2 | 0 | hsa-miR-1908 | -0.87 | N/A | Sites in UTR |
| EPHA2    | NM_004431    | EPH receptor A2                                                 | 0 | 0 | 0 | 0 | 2 | 2 | 0 | 0 | hsa-miR-663  | -0.86 | N/A | Sites in UTR |
| EEF1A2   | NM_001958    | eukaryotic translation elongation factor 1 alpha 2              | 1 | 1 | 0 | 0 | 2 | 0 | 2 | 0 | hsa-miR-663  | -0.86 | N/A | Sites in UTR |
| LSP1     | NM_001013253 | lymphocyte-specific protein 1                                   | 0 | 0 | 0 | 0 | 2 | 1 | 1 | 0 | hsa-miR-663  | -0.85 | N/A | Sites in UTR |
| DPP9     | NM_139159    | dipeptidyl-peptidase 9                                          | 0 | 0 | 0 | 0 | 2 | 1 | 1 | 0 | hsa-miR-663  | -0.85 | N/A | Sites in UTR |
| SEC14L2  | NM_001204204 | SEC14-like 2 (S. cerevisiae)                                    | 0 | 0 | 0 | 0 | 4 | 2 | 0 | 2 | hsa-miR-663  | -0.85 | N/A | Sites in UTR |
| FGFRL1   | NM_001004356 | fibroblast growth factor receptor-like 1                        | 0 | 0 | 0 | 0 | 3 | 0 | 3 | 0 | hsa-miR-663  | -0.84 | N/A | Sites in UTR |

|          |              |                                                                                      |   |   |   |   |   |   |   |   |              |       |     |              |
|----------|--------------|--------------------------------------------------------------------------------------|---|---|---|---|---|---|---|---|--------------|-------|-----|--------------|
| CCDC144A | NM_014695    | coiled-coil domain containing 144A                                                   | 0 | 0 | 0 | 0 | 2 | 1 | 0 | 1 | hsa-miR-663  | -0.82 | N/A | Sites in UTR |
| VWA1     | NM_022834    | von Willebrand factor A domain containing 1                                          | 0 | 0 | 0 | 0 | 5 | 0 | 4 | 1 | hsa-miR-663  | -0.82 | N/A | Sites in UTR |
| RAB11B   | NM_004218    | RAB11B, member RAS oncogene family                                                   | 0 | 0 | 0 | 0 | 2 | 1 | 1 | 0 | hsa-miR-663  | -0.82 | N/A | Sites in UTR |
| GGA3     | NM_001172703 | golgi-associated, gamma adaptin ear containing, ARF binding protein 3                | 0 | 0 | 0 | 0 | 2 | 2 | 0 | 0 | hsa-miR-663  | -0.82 | N/A | Sites in UTR |
| SHOX     | NM_000451    | short stature homeobox                                                               | 0 | 0 | 0 | 0 | 3 | 0 | 3 | 0 | hsa-miR-663  | -0.82 | N/A | Sites in UTR |
| COL8A2   | NM_005202    | collagen, type VIII, alpha 2                                                         | 0 | 0 | 0 | 0 | 2 | 2 | 0 | 0 | hsa-miR-663  | -0.81 | N/A | Sites in UTR |
| KIAA0284 | NM_001112726 | KIAA0284                                                                             | 0 | 0 | 0 | 0 | 3 | 0 | 3 | 0 | hsa-miR-663  | -0.81 | N/A | Sites in UTR |
| PITPNM2  | NM_020845    | phosphatidylinositol transfer protein, membrane-associated 2                         | 0 | 0 | 0 | 0 | 3 | 1 | 2 | 0 | hsa-miR-1908 | -0.81 | N/A | Sites in UTR |
| BBS5     | NM_152384    | Bardet-Biedl syndrome 5                                                              | 0 | 0 | 0 | 0 | 6 | 1 | 4 | 1 | hsa-miR-1908 | -0.81 | N/A | Sites in UTR |
| C3orf70  | NM_001025266 | chromosome 3 open reading frame 70                                                   | 0 | 0 | 0 | 0 | 3 | 0 | 2 | 1 | hsa-miR-1908 | -0.8  | N/A | Sites in UTR |
| C7orf26  | NM_024067    | chromosome 7 open reading frame 26                                                   | 0 | 0 | 0 | 0 | 2 | 1 | 1 | 0 | hsa-miR-1908 | -0.8  | N/A | Sites in UTR |
| BCAM     | NM_005581    | basal cell adhesion molecule (Lutheran blood group)                                  | 0 | 0 | 0 | 0 | 3 | 0 | 3 | 0 | hsa-miR-663  | -0.8  | N/A | Sites in UTR |
| FAM73B   | NM_032809    | family with sequence similarity 73, member B                                         | 0 | 0 | 0 | 0 | 4 | 0 | 4 | 0 | hsa-miR-663  | -0.8  | N/A | Sites in UTR |
| MF12     | NM_005929    | antigen p97 (melanoma associated) identified by monoclonal antibodies 133.2 and 96.5 | 0 | 0 | 0 | 0 | 6 | 0 | 3 | 3 | hsa-miR-663  | -0.79 | N/A | Sites in UTR |
| CNN2     | NM_004368    | calponin 2                                                                           | 0 | 0 | 0 | 0 | 2 | 1 | 1 | 0 | hsa-miR-663  | -0.78 | N/A | Sites in UTR |
| C9orf167 | NM_017723    | chromosome 9 open reading frame 167                                                  | 0 | 0 | 0 | 0 | 5 | 0 | 3 | 2 | hsa-miR-663  | -0.78 | N/A | Sites in UTR |
| PIP5K1C  | NM_001195733 | phosphatidylinositol-4-phosphate 5-kinase, type I, gamma                             | 0 | 0 | 0 | 0 | 3 | 1 | 2 | 0 | hsa-miR-1908 | -0.76 | N/A | Sites in UTR |
| ISLR2    | NM_001130136 | immunoglobulin superfamily containing leucine-rich repeat 2                          | 0 | 0 | 0 | 0 | 2 | 1 | 1 | 0 | hsa-miR-1908 | -0.76 | N/A | Sites in UTR |
| GRASP    | NM_181711    | GRP1 (general receptor for phosphoinositides 1)-associated scaffold protein          | 0 | 0 | 0 | 0 | 2 | 1 | 1 | 0 | hsa-miR-1908 | -0.75 | N/A | Sites in UTR |
| MKMK2    | NM_199054    | MAP kinase interacting serine/threonine kinase 2                                     | 0 | 0 | 0 | 0 | 4 | 0 | 3 | 1 | hsa-miR-663  | -0.75 | N/A | Sites in UTR |

|          |              |                                                                   |   |   |   |   |   |   |   |   |              |       |     |              |
|----------|--------------|-------------------------------------------------------------------|---|---|---|---|---|---|---|---|--------------|-------|-----|--------------|
| ARHGAP6  | NM_013423    | Rho GTPase activating protein 6                                   | 0 | 0 | 0 | 0 | 2 | 1 | 1 | 0 | hsa-miR-663  | -0.75 | N/A | Sites in UTR |
| RER1     | NM_007033    | RER1 retention in endoplasmic reticulum 1 homolog (S. cerevisiae) | 0 | 0 | 0 | 0 | 3 | 1 | 1 | 1 | hsa-miR-663  | -0.75 | N/A | Sites in UTR |
| TBL1X    | NM_001139466 | transducin (beta)-like 1X-linked                                  | 0 | 0 | 0 | 0 | 2 | 2 | 0 | 0 | hsa-miR-1908 | -0.74 | N/A | Sites in UTR |
| TMEM120B | NM_001080825 | transmembrane protein 120B                                        | 0 | 0 | 0 | 0 | 2 | 1 | 1 | 0 | hsa-miR-1908 | -0.74 | N/A | Sites in UTR |
| ZNF512B  | NM_020713    | zinc finger protein 512B                                          | 0 | 0 | 0 | 0 | 3 | 0 | 3 | 0 | hsa-miR-1908 | -0.74 | N/A | Sites in UTR |
| DDA1     | NM_024050    | DET1 and DDB1 associated 1                                        | 0 | 0 | 0 | 0 | 3 | 0 | 2 | 1 | hsa-miR-663  | -0.74 | N/A | Sites in UTR |
| DIS3L2   | NM_152383    | DIS3 mitotic control homolog (S. cerevisiae)-like 2               | 0 | 0 | 0 | 0 | 3 | 0 | 2 | 1 | hsa-miR-663  | -0.73 | N/A | Sites in UTR |
| ZNF385A  | NM_001130967 | zinc finger protein 385A                                          | 3 | 0 | 3 | 0 | 0 | 0 | 0 | 0 | hsa-miR-1908 | -0.73 | N/A | Sites in UTR |
| USP11    | NM_004651    | ubiquitin specific peptidase 11                                   | 0 | 0 | 0 | 0 | 2 | 1 | 1 | 0 | hsa-miR-663  | -0.73 | N/A | Sites in UTR |
| SNCB     | NM_001001502 | synuclein, beta                                                   | 0 | 0 | 0 | 0 | 3 | 0 | 3 | 0 | hsa-miR-663  | -0.72 | N/A | Sites in UTR |
| KIFC2    | NM_145754    | kinesin family member C2                                          | 0 | 0 | 0 | 0 | 2 | 1 | 1 | 0 | hsa-miR-1908 | -0.72 | N/A | Sites in UTR |
| AP2A2    | NM_001242837 | adaptor-related protein complex 2, alpha 2 subunit                | 0 | 0 | 0 | 0 | 3 | 0 | 2 | 1 | hsa-miR-663  | -0.7  | N/A | Sites in UTR |
| DUSP8    | NM_004420    | dual specificity phosphatase 8                                    | 0 | 0 | 0 | 0 | 4 | 0 | 3 | 1 | hsa-miR-663  | -0.7  | N/A | Sites in UTR |
| STX1A    | NM_001165903 | syntaxin 1A (brain)                                               | 0 | 0 | 0 | 0 | 3 | 0 | 3 | 0 | hsa-miR-1908 | -0.7  | N/A | Sites in UTR |
| C6orf223 | NM_001171992 | chromosome 6 open reading frame 223                               | 0 | 0 | 0 | 0 | 3 | 1 | 2 | 0 | hsa-miR-1908 | -0.7  | N/A | Sites in UTR |
| MYL9     | NM_006097    | myosin, light chain 9, regulatory                                 | 1 | 1 | 0 | 0 | 1 | 0 | 0 | 1 | hsa-miR-663  | -0.68 | N/A | Sites in UTR |
| G6PD     | NM_000402    | glucose-6-phosphate dehydrogenase                                 | 0 | 0 | 0 | 0 | 2 | 1 | 0 | 1 | hsa-miR-663  | -0.68 | N/A | Sites in UTR |
| YIF1B    | NM_001039671 | Yip1 interacting factor homolog B (S. cerevisiae)                 | 0 | 0 | 0 | 0 | 2 | 1 | 1 | 0 | hsa-miR-663  | -0.68 | N/A | Sites in UTR |
| SCAMP4   | NM_079834    | secretory carrier membrane protein 4                              | 0 | 0 | 0 | 0 | 2 | 1 | 1 | 0 | hsa-miR-663  | -0.68 | N/A | Sites in UTR |
| FBXL16   | NM_153350    | F-box and leucine-rich repeat protein 16                          | 0 | 0 | 0 | 0 | 3 | 1 | 2 | 0 | hsa-miR-663  | -0.68 | N/A | Sites in UTR |

|          |              |                                                                                         |   |   |   |   |   |   |   |   |              |       |     |              |
|----------|--------------|-----------------------------------------------------------------------------------------|---|---|---|---|---|---|---|---|--------------|-------|-----|--------------|
| PAX2     | NM_000278    | paired box 2                                                                            | 1 | 0 | 1 | 0 | 3 | 0 | 2 | 1 | hsa-miR-663  | -0.67 | N/A | Sites in UTR |
| ARHGEF18 | NM_001130955 | Rho/Rac guanine nucleotide exchange factor (GEF) 18                                     | 0 | 0 | 0 | 0 | 2 | 1 | 0 | 1 | hsa-miR-663  | -0.67 | N/A | Sites in UTR |
| WWOX     | NM_130844    | WW domain containing oxidoreductase                                                     | 0 | 0 | 0 | 0 | 1 | 1 | 0 | 0 | hsa-miR-663  | -0.67 | N/A | Sites in UTR |
| SOLH     | NM_005632    | small optic lobes homolog (Drosophila)                                                  | 0 | 0 | 0 | 0 | 3 | 0 | 2 | 1 | hsa-miR-1908 | -0.66 | N/A | Sites in UTR |
| GNG7     | NM_052847    | guanine nucleotide binding protein (G protein), gamma 7                                 | 0 | 0 | 0 | 0 | 2 | 1 | 0 | 1 | hsa-miR-1908 | -0.66 | N/A | Sites in UTR |
| RFX1     | NM_002918    | regulatory factor X, 1 (influences HLA class II expression)                             | 0 | 0 | 0 | 0 | 3 | 1 | 2 | 0 | hsa-miR-663  | -0.66 | N/A | Sites in UTR |
| SLC25A35 | NM_201520    | solute carrier family 25, member 35                                                     | 1 | 0 | 1 | 0 | 3 | 0 | 1 | 2 | hsa-miR-663  | -0.66 | N/A | Sites in UTR |
| NKIRAS2  | NM_001001349 | NFKB inhibitor interacting Ras-like 2                                                   | 0 | 0 | 0 | 0 | 2 | 1 | 0 | 1 | hsa-miR-663  | -0.66 | N/A | Sites in UTR |
| FAM43B   | NM_207334    | family with sequence similarity 43, member B                                            | 0 | 0 | 0 | 0 | 3 | 0 | 2 | 1 | hsa-miR-663  | -0.66 | N/A | Sites in UTR |
| LINGO1   | NM_032808    | leucine rich repeat and Ig domain containing 1                                          | 0 | 0 | 0 | 0 | 2 | 1 | 1 | 0 | hsa-miR-663  | -0.65 | N/A | Sites in UTR |
| SIX2     | NM_016932    | SIX homeobox 2                                                                          | 0 | 0 | 0 | 0 | 2 | 1 | 1 | 0 | hsa-miR-663  | -0.65 | N/A | Sites in UTR |
| 5-Sep    | NM_001009939 | septin 5                                                                                | 0 | 0 | 0 | 0 | 3 | 0 | 2 | 1 | hsa-miR-663  | -0.65 | N/A | Sites in UTR |
| ATAT1    | NM_001190724 | alpha tubulin acetyltransferase 1                                                       | 0 | 0 | 0 | 0 | 2 | 1 | 1 | 0 | hsa-miR-663  | -0.64 | N/A | Sites in UTR |
| MYO1D    | NM_015194    | myosin ID                                                                               | 0 | 0 | 0 | 0 | 3 | 0 | 3 | 0 | hsa-miR-663  | -0.64 | N/A | Sites in UTR |
| KIAA0930 | NM_001009880 | KIAA0930                                                                                | 0 | 0 | 0 | 0 | 3 | 0 | 2 | 1 | hsa-miR-663  | -0.64 | N/A | Sites in UTR |
| NTN5     | NM_145807    | netrin 5                                                                                | 0 | 0 | 0 | 0 | 1 | 1 | 0 | 0 | hsa-miR-663  | -0.64 | N/A | Sites in UTR |
| GNAI2    | NM_001166425 | guanine nucleotide binding protein (G protein), alpha inhibiting activity polypeptide 2 | 0 | 0 | 0 | 0 | 2 | 0 | 2 | 0 | hsa-miR-663  | -0.63 | N/A | Sites in UTR |
| MXD4     | NM_006454    | MAX dimerization protein 4                                                              | 0 | 0 | 0 | 0 | 2 | 1 | 0 | 1 | hsa-miR-1908 | -0.63 | N/A | Sites in UTR |
| SHC3     | NM_016848    | SHC (Src homology 2 domain containing) transforming protein 3                           | 0 | 0 | 0 | 0 | 3 | 2 | 1 | 0 | hsa-miR-663  | -0.63 | N/A | Sites in UTR |
| NF2      | NM_000268    | neurofibromin 2 (merlin)                                                                | 0 | 0 | 0 | 0 | 2 | 1 | 1 | 0 | hsa-miR-1908 | -0.63 | N/A | Sites in UTR |

|          |              |                                                                             |   |   |   |   |   |   |   |   |              |       |     |              |
|----------|--------------|-----------------------------------------------------------------------------|---|---|---|---|---|---|---|---|--------------|-------|-----|--------------|
| ZNF710   | NM_198526    | zinc finger protein 710                                                     | 0 | 0 | 0 | 0 | 3 | 0 | 2 | 1 | hsa-miR-663  | -0.63 | N/A | Sites in UTR |
| FLCN     | NM_144997    | folliculin                                                                  | 0 | 0 | 0 | 0 | 2 | 1 | 0 | 1 | hsa-miR-1908 | -0.63 | N/A | Sites in UTR |
| EXTL1    | NM_004455    | exostoses (multiple)-like 1                                                 | 0 | 0 | 0 | 0 | 2 | 1 | 1 | 0 | hsa-miR-663  | -0.62 | N/A | Sites in UTR |
| EFNA2    | NM_001405    | ephrin-A2                                                                   | 0 | 0 | 0 | 0 | 3 | 0 | 3 | 0 | hsa-miR-663  | -0.62 | N/A | Sites in UTR |
| TMEM143  | NM_018273    | transmembrane protein 143                                                   | 0 | 0 | 0 | 0 | 2 | 0 | 2 | 0 | hsa-miR-1908 | -0.62 | N/A | Sites in UTR |
| ACSL3    | NM_004457    | acyl-CoA synthetase long-chain family member 3                              | 0 | 0 | 0 | 0 | 1 | 1 | 0 | 0 | hsa-miR-1908 | -0.62 | N/A | Sites in UTR |
| RGS6     | NM_001204416 | regulator of G-protein signaling 6                                          | 0 | 0 | 0 | 0 | 2 | 1 | 1 | 0 | hsa-miR-1908 | -0.61 | N/A | Sites in UTR |
| PROP1    | NM_006261    | PROP paired-like homeobox 1                                                 | 0 | 0 | 0 | 0 | 1 | 1 | 0 | 0 | hsa-miR-663  | -0.61 | N/A | Sites in UTR |
| NR5A1    | NM_004959    | nuclear receptor subfamily 5, group A, member 1                             | 0 | 0 | 0 | 0 | 3 | 0 | 2 | 1 | hsa-miR-663  | -0.61 | N/A | Sites in UTR |
| WIPF3    | NM_001080529 | WAS/WASL interacting protein family, member 3                               | 0 | 0 | 0 | 0 | 1 | 1 | 0 | 0 | hsa-miR-1908 | -0.61 | N/A | Sites in UTR |
| TFAP2B   | NM_003221    | transcription factor AP-2 beta (activating enhancer binding protein 2 beta) | 0 | 0 | 0 | 0 | 3 | 0 | 3 | 0 | hsa-miR-1908 | -0.61 | N/A | Sites in UTR |
| SYT7     | NM_004200    | synaptotagmin VII                                                           | 0 | 0 | 0 | 0 | 3 | 1 | 1 | 1 | hsa-miR-1908 | -0.61 | N/A | Sites in UTR |
| CCDC67   | NM_181645    | coiled-coil domain containing 67                                            | 0 | 0 | 0 | 0 | 1 | 1 | 0 | 0 | hsa-miR-663  | -0.6  | N/A | Sites in UTR |
| SRCIN1   | NM_025248    | SRC kinase signaling inhibitor 1                                            | 0 | 0 | 0 | 0 | 3 | 0 | 3 | 0 | hsa-miR-663  | -0.6  | N/A | Sites in UTR |
| IL17REL  | NM_001001694 | interleukin 17 receptor E-like                                              | 0 | 0 | 0 | 0 | 1 | 1 | 0 | 0 | hsa-miR-663  | -0.6  | N/A | Sites in UTR |
| SLC24A6  | NM_024959    | solute carrier family 24 (sodium/potassium/calcium exchanger), member 6     | 0 | 0 | 0 | 0 | 2 | 0 | 2 | 0 | hsa-miR-663  | -0.6  | N/A | Sites in UTR |
| C10orf90 | NM_001004298 | chromosome 10 open reading frame 90                                         | 0 | 0 | 0 | 0 | 2 | 0 | 2 | 0 | hsa-miR-663  | -0.59 | N/A | Sites in UTR |
| C8orf82  | NM_001001795 | chromosome 8 open reading frame 82                                          | 0 | 0 | 0 | 0 | 3 | 0 | 3 | 0 | hsa-miR-663  | -0.59 | N/A | Sites in UTR |
| GLO1     | NM_006708    | glyoxalase I                                                                | 0 | 0 | 0 | 0 | 1 | 1 | 0 | 0 | hsa-miR-1908 | -0.59 | N/A | Sites in UTR |
| ILK      | NM_001014794 | integrin-linked kinase                                                      | 0 | 0 | 0 | 0 | 2 | 0 | 2 | 0 | hsa-miR-1908 | -0.59 | N/A | Sites in UTR |

|         |              |                                                                                       |   |   |   |   |   |   |   |   |              |       |     |              |
|---------|--------------|---------------------------------------------------------------------------------------|---|---|---|---|---|---|---|---|--------------|-------|-----|--------------|
| OSBPL7  | NM_145798    | oxysterol binding protein-like 7                                                      | 0 | 0 | 0 | 0 | 2 | 0 | 2 | 0 | hsa-miR-663  | -0.59 | N/A | Sites in UTR |
| RMND5A  | NM_022780    | required for meiotic nuclear division 5 homolog A ( <i>S. cerevisiae</i> )            | 0 | 0 | 0 | 0 | 1 | 1 | 0 | 0 | hsa-miR-1908 | -0.58 | N/A | Sites in UTR |
| TTYH3   | NM_025250    | tweety homolog 3 ( <i>Drosophila</i> )                                                | 0 | 0 | 0 | 0 | 5 | 1 | 1 | 3 | hsa-miR-663  | -0.58 | N/A | Sites in UTR |
| GBP5    | NM_001134486 | guanylate binding protein 5                                                           | 0 | 0 | 0 | 0 | 2 | 1 | 1 | 0 | hsa-miR-663  | -0.58 | N/A | Sites in UTR |
| WDR5    | NM_017588    | WD repeat domain 5                                                                    | 0 | 0 | 0 | 0 | 2 | 1 | 0 | 1 | hsa-miR-663  | -0.58 | N/A | Sites in UTR |
| CELSR1  | NM_014246    | cadherin, EGF LAG seven-pass G-type receptor 1 (flamingo homolog, <i>Drosophila</i> ) | 0 | 0 | 0 | 0 | 3 | 0 | 3 | 0 | hsa-miR-663  | -0.58 | N/A | Sites in UTR |
| TSPAN33 | NM_178562    | tetraspanin 33                                                                        | 0 | 0 | 0 | 0 | 3 | 0 | 2 | 1 | hsa-miR-1908 | -0.58 | N/A | Sites in UTR |
| IGHMBP2 | NM_002180    | immunoglobulin mu binding protein 2                                                   | 0 | 0 | 0 | 0 | 1 | 1 | 0 | 0 | hsa-miR-663  | -0.58 | N/A | Sites in UTR |
| GIGYF1  | NM_022574    | GRB10 interacting GYF protein 1                                                       | 0 | 0 | 0 | 0 | 3 | 0 | 2 | 1 | hsa-miR-663  | -0.57 | N/A | Sites in UTR |
| CYP3A43 | NM_022820    | cytochrome P450, family 3, subfamily A, polypeptide 43                                | 0 | 0 | 0 | 0 | 1 | 1 | 0 | 0 | hsa-miR-1908 | -0.57 | N/A | Sites in UTR |
| PTGDS   | NM_000954    | prostaglandin D2 synthase 21kDa (brain)                                               | 0 | 0 | 0 | 0 | 1 | 1 | 0 | 0 | hsa-miR-663  | -0.57 | N/A | Sites in UTR |
| URB1    | NM_014825    | URB1 ribosome biogenesis 1 homolog ( <i>S. cerevisiae</i> )                           | 0 | 0 | 0 | 0 | 1 | 1 | 0 | 0 | hsa-miR-1908 | -0.57 | N/A | Sites in UTR |
| ESPN    | NM_031475    | espin                                                                                 | 0 | 0 | 0 | 0 | 1 | 1 | 0 | 0 | hsa-miR-1908 | -0.57 | N/A | Sites in UTR |
| MAFB    | NM_005461    | v-maf musculoaponeurotic fibrosarcoma oncogene homolog B (avian)                      | 0 | 0 | 0 | 0 | 2 | 1 | 1 | 0 | hsa-miR-663  | -0.57 | N/A | Sites in UTR |
| NXPH4   | NM_007224    | neurexophilin 4                                                                       | 0 | 0 | 0 | 0 | 2 | 0 | 1 | 1 | hsa-miR-1908 | -0.57 | N/A | Sites in UTR |
| ZNF784  | NM_203374    | zinc finger protein 784                                                               | 0 | 0 | 0 | 0 | 1 | 1 | 0 | 0 | hsa-miR-1908 | -0.57 | N/A | Sites in UTR |
| REG4    | NM_001159352 | regenerating islet-derived family, member 4                                           | 0 | 0 | 0 | 0 | 1 | 1 | 0 | 0 | hsa-miR-1908 | -0.56 | N/A | Sites in UTR |
| FHL3    | NM_004468    | four and a half LIM domains 3                                                         | 0 | 0 | 0 | 0 | 1 | 1 | 0 | 0 | hsa-miR-1908 | -0.56 | N/A | Sites in UTR |
| GMIP    | NM_016573    | GEM interacting protein                                                               | 0 | 0 | 0 | 0 | 1 | 1 | 0 | 0 | hsa-miR-663  | -0.56 | N/A | Sites in UTR |
| PDIA2   | NM_006849    | protein disulfide isomerase family A, member 2                                        | 0 | 0 | 0 | 0 | 1 | 1 | 0 | 0 | hsa-miR-663  | -0.56 | N/A | Sites in UTR |

|         |              |                                                                                         |   |   |   |   |   |   |   |   |              |       |     |              |
|---------|--------------|-----------------------------------------------------------------------------------------|---|---|---|---|---|---|---|---|--------------|-------|-----|--------------|
| CCL22   | NM_002990    | chemokine (C-C motif) ligand 22                                                         | 0 | 0 | 0 | 0 | 1 | 1 | 0 | 0 | hsa-miR-1908 | -0.56 | N/A | Sites in UTR |
| ZNF787  | NM_001002836 | zinc finger protein 787                                                                 | 0 | 0 | 0 | 0 | 2 | 0 | 2 | 0 | hsa-miR-663  | -0.56 | N/A | Sites in UTR |
| STK33   | NM_030906    | serine/threonine kinase 33                                                              | 0 | 0 | 0 | 0 | 1 | 1 | 0 | 0 | hsa-miR-1908 | -0.56 | N/A | Sites in UTR |
| KCP     | NM_001135914 | kielin/chordin-like protein                                                             | 0 | 0 | 0 | 0 | 1 | 1 | 0 | 0 | hsa-miR-663  | -0.56 | N/A | Sites in UTR |
| SIGLEC8 | NM_014442    | sialic acid binding Ig-like lectin 8                                                    | 0 | 0 | 0 | 0 | 1 | 1 | 0 | 0 | hsa-miR-1908 | -0.56 | N/A | Sites in UTR |
| OPA3    | NM_001017989 | optic atrophy 3 (autosomal recessive, with chorea and spastic paraplegia)               | 0 | 0 | 0 | 0 | 2 | 0 | 2 | 0 | hsa-miR-1908 | -0.56 | N/A | Sites in UTR |
| OTOS    | NM_148961    | otospiralin                                                                             | 0 | 0 | 0 | 0 | 1 | 1 | 0 | 0 | hsa-miR-663  | -0.55 | N/A | Sites in UTR |
| DISC1   | NM_001012957 | disrupted in schizophrenia 1                                                            | 0 | 0 | 0 | 0 | 1 | 1 | 0 | 0 | hsa-miR-1908 | -0.55 | N/A | Sites in UTR |
| C2orf65 | NM_138804    | chromosome 2 open reading frame 65                                                      | 0 | 0 | 0 | 0 | 1 | 1 | 0 | 0 | hsa-miR-1908 | -0.55 | N/A | Sites in UTR |
| IL11    | NM_000641    | interleukin 11                                                                          | 0 | 0 | 0 | 0 | 1 | 1 | 0 | 0 | hsa-miR-1908 | -0.55 | N/A | Sites in UTR |
| SLC17A7 | NM_020309    | solute carrier family 17 (sodium-dependent inorganic phosphate cotransporter), member 7 | 1 | 1 | 0 | 0 | 0 | 0 | 0 | 0 | hsa-miR-1908 | -0.55 | N/A | Sites in UTR |
| LPIN2   | NM_014646    | lipin 2                                                                                 | 0 | 0 | 0 | 0 | 3 | 0 | 2 | 1 | hsa-miR-663  | -0.55 | N/A | Sites in UTR |
| CARM1   | NM_199141    | coactivator-associated arginine methyltransferase 1                                     | 0 | 0 | 0 | 0 | 3 | 0 | 3 | 0 | hsa-miR-663  | -0.55 | N/A | Sites in UTR |
| APC2    | NM_005883    | adenomatosis polyposis coli 2                                                           | 0 | 0 | 0 | 0 | 3 | 0 | 3 | 0 | hsa-miR-663  | -0.55 | N/A | Sites in UTR |
| CCR7    | NM_001838    | chemokine (C-C motif) receptor 7                                                        | 0 | 0 | 0 | 0 | 1 | 1 | 0 | 0 | hsa-miR-1908 | -0.55 | N/A | Sites in UTR |
| CRTC1   | NM_001098482 | CREB regulated transcription coactivator 1                                              | 0 | 0 | 0 | 0 | 2 | 1 | 0 | 1 | hsa-miR-663  | -0.55 | N/A | Sites in UTR |
| PRDM15  | NM_001040424 | PR domain containing 15                                                                 | 0 | 0 | 0 | 0 | 1 | 1 | 0 | 0 | hsa-miR-1908 | -0.55 | N/A | Sites in UTR |
| TMBIM1  | NM_022152    | transmembrane BAX inhibitor motif containing 1                                          | 0 | 0 | 0 | 0 | 1 | 1 | 0 | 0 | hsa-miR-1908 | -0.55 | N/A | Sites in UTR |
| DCTN5   | NM_001199743 | dynactin 5 (p25)                                                                        | 0 | 0 | 0 | 0 | 1 | 1 | 0 | 0 | hsa-miR-663  | -0.55 | N/A | Sites in UTR |
| UNC13D  | NM_199242    | unc-13 homolog D (C. elegans)                                                           | 0 | 0 | 0 | 0 | 1 | 1 | 0 | 0 | hsa-miR-663  | -0.55 | N/A | Sites in UTR |



|                 |              |                                                                      |   |   |   |   |   |   |   |   |              |       |     |              |
|-----------------|--------------|----------------------------------------------------------------------|---|---|---|---|---|---|---|---|--------------|-------|-----|--------------|
| NLE1            | NM_001014445 | notchless homolog 1 (Drosophila)                                     | 0 | 0 | 0 | 0 | 2 | 0 | 2 | 0 | hsa-miR-663  | -0.55 | N/A | Sites in UTR |
| EPB41L1         | NM_012156    | erythrocyte membrane protein band 4.1-like 1                         | 0 | 0 | 0 | 0 | 1 | 1 | 0 | 0 | hsa-miR-663  | -0.55 | N/A | Sites in UTR |
| ROD1            | NM_001163788 | ROD1 regulator of differentiation 1 (S. pombe)                       | 0 | 0 | 0 | 0 | 1 | 1 | 0 | 0 | hsa-miR-663  | -0.55 | N/A | Sites in UTR |
| UBXN6           | NM_001171091 | UBX domain protein 6                                                 | 0 | 0 | 0 | 0 | 1 | 1 | 0 | 0 | hsa-miR-663  | -0.55 | N/A | Sites in UTR |
| NT5C3L          | NM_052935    | 5'-nucleotidase, cytosolic III-like                                  | 0 | 0 | 0 | 0 | 1 | 1 | 0 | 0 | hsa-miR-1908 | -0.54 | N/A | Sites in UTR |
| ZBTB22          | NM_001145338 | zinc finger and BTB domain containing 22                             | 0 | 0 | 0 | 0 | 1 | 1 | 0 | 0 | hsa-miR-663  | -0.54 | N/A | Sites in UTR |
| PI4K2A          | NM_018425    | phosphatidylinositol 4-kinase type 2 alpha                           | 0 | 0 | 0 | 0 | 2 | 1 | 1 | 0 | hsa-miR-663  | -0.54 | N/A | Sites in UTR |
| ADRBK1          | NM_001619    | adrenergic, beta, receptor kinase 1                                  | 0 | 0 | 0 | 0 | 2 | 0 | 1 | 1 | hsa-miR-1908 | -0.54 | N/A | Sites in UTR |
| LDOC1           | NM_012317    | leucine zipper, down-regulated in cancer 1                           | 0 | 0 | 0 | 0 | 1 | 1 | 0 | 0 | hsa-miR-663  | -0.54 | N/A | Sites in UTR |
| BEGAIN          | NM_001159531 | brain-enriched guanylate kinase-associated homolog (rat)             | 0 | 0 | 0 | 0 | 1 | 1 | 0 | 0 | hsa-miR-1908 | -0.54 | N/A | Sites in UTR |
| SLX4            | NM_032444    | SLX4 structure-specific endonuclease subunit homolog (S. cerevisiae) | 0 | 0 | 0 | 0 | 1 | 1 | 0 | 0 | hsa-miR-663  | -0.54 | N/A | Sites in UTR |
| C1QTNF6         | NM_031910    | C1q and tumor necrosis factor related protein 6                      | 0 | 0 | 0 | 0 | 1 | 1 | 0 | 0 | hsa-miR-663  | -0.54 | N/A | Sites in UTR |
| SBF1            | NM_002972    | SET binding factor 1                                                 | 2 | 0 | 2 | 0 | 1 | 0 | 0 | 1 | hsa-miR-663  | -0.53 | N/A | Sites in UTR |
| MX2             | NM_002463    | myxovirus (influenza virus) resistance 2 (mouse)                     | 0 | 0 | 0 | 0 | 1 | 1 | 0 | 0 | hsa-miR-1908 | -0.53 | N/A | Sites in UTR |
| RASD2           | NM_014310    | RASD family, member 2                                                | 0 | 0 | 0 | 0 | 1 | 1 | 0 | 0 | hsa-miR-663  | -0.53 | N/A | Sites in UTR |
| PDXP            | NM_020315    | pyridoxal (pyridoxine, vitamin B6) phosphatase                       | 0 | 0 | 0 | 0 | 1 | 1 | 0 | 0 | hsa-miR-1908 | -0.53 | N/A | Sites in UTR |
| CSNK2A1         | NM_001895    | casein kinase 2, alpha 1 polypeptide                                 | 0 | 0 | 0 | 0 | 1 | 1 | 0 | 0 | hsa-miR-1908 | -0.53 | N/A | Sites in UTR |
| SOHLH2          | NM_017826    | spermatogenesis and oogenesis specific basic helix-loop-helix 2      | 0 | 0 | 0 | 0 | 1 | 1 | 0 | 0 | hsa-miR-1908 | -0.53 | N/A | Sites in UTR |
| C13orf38-SOHLH2 | NM_001198910 | C13orf38-SOHLH2 readthrough                                          | 0 | 0 | 0 | 0 | 1 | 1 | 0 | 0 | hsa-miR-1908 | -0.53 | N/A | Sites in UTR |
| AK1             | NM_000476    | adenylate kinase 1                                                   | 0 | 0 | 0 | 0 | 2 | 0 | 2 | 0 | hsa-miR-1908 | -0.53 | N/A | Sites in UTR |

|          |              |                                                    |   |   |   |   |   |   |   |   |              |       |     |              |
|----------|--------------|----------------------------------------------------|---|---|---|---|---|---|---|---|--------------|-------|-----|--------------|
| CBX2     | NM_032647    | chromobox homolog 2                                | 0 | 0 | 0 | 0 | 1 | 1 | 0 | 0 | hsa-miR-1908 | -0.53 | N/A | Sites in UTR |
| ASB13    | NM_024701    | ankyrin repeat and SOCS box containing 13          | 0 | 0 | 0 | 0 | 2 | 0 | 1 | 1 | hsa-miR-1908 | -0.53 | N/A | Sites in UTR |
| APLNR    | NM_005161    | apelin receptor                                    | 0 | 0 | 0 | 0 | 2 | 0 | 2 | 0 | hsa-miR-663  | -0.53 | N/A | Sites in UTR |
| TNKS1BP1 | NM_033396    | tankyrase 1 binding protein 1, 182kDa              | 0 | 0 | 0 | 0 | 1 | 1 | 0 | 0 | hsa-miR-663  | -0.53 | N/A | Sites in UTR |
| BLK      | NM_001715    | B lymphoid tyrosine kinase                         | 0 | 0 | 0 | 0 | 2 | 0 | 2 | 0 | hsa-miR-663  | -0.53 | N/A | Sites in UTR |
| AKT1S1   | NM_001098632 | AKT1 substrate 1 (proline-rich)                    | 1 | 0 | 1 | 0 | 1 | 0 | 1 | 0 | hsa-miR-663  | -0.53 | N/A | Sites in UTR |
| TMEM132A | NM_017870    | transmembrane protein 132A                         | 0 | 0 | 0 | 0 | 1 | 1 | 0 | 0 | hsa-miR-1908 | -0.53 | N/A | Sites in UTR |
| ALPL2    | NM_031313    | alkaline phosphatase, placental-like 2             | 0 | 0 | 0 | 0 | 2 | 0 | 2 | 0 | hsa-miR-1908 | -0.53 | N/A | Sites in UTR |
| ZBTB7B   | NM_015872    | zinc finger and BTB domain containing 7B           | 1 | 0 | 1 | 0 | 2 | 0 | 2 | 0 | hsa-miR-1908 | -0.53 | N/A | Sites in UTR |
| IFI35    | NM_005533    | interferon-induced protein 35                      | 0 | 0 | 0 | 0 | 1 | 1 | 0 | 0 | hsa-miR-663  | -0.53 | N/A | Sites in UTR |
| HRAS     | NM_001130442 | v-Ha-ras Harvey rat sarcoma viral oncogene homolog | 0 | 0 | 0 | 0 | 2 | 0 | 2 | 0 | hsa-miR-663  | -0.52 | N/A | Sites in UTR |
| C6orf221 | NM_001017361 | chromosome 6 open reading frame 221                | 0 | 0 | 0 | 0 | 2 | 0 | 2 | 0 | hsa-miR-663  | -0.52 | N/A | Sites in UTR |
| POLM     | NM_013284    | polymerase (DNA directed), mu                      | 0 | 0 | 0 | 0 | 1 | 1 | 0 | 0 | hsa-miR-1908 | -0.52 | N/A | Sites in UTR |
| SLC25A40 | NM_018843    | solute carrier family 25, member 40                | 0 | 0 | 0 | 0 | 1 | 1 | 0 | 0 | hsa-miR-663  | -0.52 | N/A | Sites in UTR |
| SPRY4    | NM_001127496 | sprouty homolog 4 (Drosophila)                     | 0 | 0 | 0 | 0 | 1 | 1 | 0 | 0 | hsa-miR-1908 | -0.52 | N/A | Sites in UTR |
| CTIF     | NM_001142397 | CBP80/20-dependent translation initiation factor   | 0 | 0 | 0 | 0 | 2 | 1 | 0 | 1 | hsa-miR-663  | -0.52 | N/A | Sites in UTR |
| DYSFIP1  | NM_001007533 | dysferlin interacting protein 1                    | 0 | 0 | 0 | 0 | 1 | 1 | 0 | 0 | hsa-miR-663  | -0.52 | N/A | Sites in UTR |
| PRKCG    | NM_002739    | protein kinase C, gamma                            | 0 | 0 | 0 | 0 | 2 | 0 | 2 | 0 | hsa-miR-663  | -0.52 | N/A | Sites in UTR |
| TTC22    | NM_001114108 | tetratricopeptide repeat domain 22                 | 0 | 0 | 0 | 0 | 2 | 0 | 2 | 0 | hsa-miR-663  | -0.52 | N/A | Sites in UTR |
| HSPB1    | NM_001540    | heat shock 27kDa protein 1                         | 0 | 0 | 0 | 0 | 1 | 1 | 0 | 0 | hsa-miR-1908 | -0.52 | N/A | Sites in UTR |

|              |              |                                                                     |   |   |   |   |   |   |   |   |              |       |     |              |
|--------------|--------------|---------------------------------------------------------------------|---|---|---|---|---|---|---|---|--------------|-------|-----|--------------|
| EZR          | NM_001111077 | ezrin                                                               | 0 | 0 | 0 | 0 | 1 | 1 | 0 | 0 | hsa-miR-663  | -0.52 | N/A | Sites in UTR |
| DENND1A      | NM_020946    | DENN/MADD domain containing 1A                                      | 0 | 0 | 0 | 0 | 1 | 1 | 0 | 0 | hsa-miR-663  | -0.52 | N/A | Sites in UTR |
| MYO1G        | NM_033054    | myosin IG                                                           | 0 | 0 | 0 | 0 | 1 | 1 | 0 | 0 | hsa-miR-1908 | -0.52 | N/A | Sites in UTR |
| ZC3H18       | NM_144604    | zinc finger CCCH-type containing 18                                 | 0 | 0 | 0 | 0 | 2 | 0 | 2 | 0 | hsa-miR-663  | -0.52 | N/A | Sites in UTR |
| TMCO6        | NM_018502    | transmembrane and coiled-coil domains 6                             | 0 | 0 | 0 | 0 | 1 | 1 | 0 | 0 | hsa-miR-1908 | -0.52 | N/A | Sites in UTR |
| FAM125A      | NM_138401    | family with sequence similarity 125, member A                       | 0 | 0 | 0 | 0 | 1 | 1 | 0 | 0 | hsa-miR-1908 | -0.52 | N/A | Sites in UTR |
| ZFPM1        | NM_153813    | zinc finger protein, multitype 1                                    | 0 | 0 | 0 | 0 | 1 | 1 | 0 | 0 | hsa-miR-663  | -0.52 | N/A | Sites in UTR |
| SLC12A5      | NM_001134771 | solute carrier family 12 (potassium/chloride transporter), member 5 | 1 | 0 | 1 | 0 | 2 | 0 | 2 | 0 | hsa-miR-663  | -0.52 | N/A | Sites in UTR |
| GTPBP5       | NM_015666    | GTP binding protein 5 (putative)                                    | 0 | 0 | 0 | 0 | 2 | 0 | 2 | 0 | hsa-miR-663  | -0.52 | N/A | Sites in UTR |
| ACAP1        | NM_014716    | ArfGAP with coiled-coil, ankyrin repeat and PH domains 1            | 0 | 0 | 0 | 0 | 1 | 1 | 0 | 0 | hsa-miR-1908 | -0.52 | N/A | Sites in UTR |
| LCN15        | NM_203347    | lipocalin 15                                                        | 0 | 0 | 0 | 0 | 2 | 0 | 2 | 0 | hsa-miR-1908 | -0.52 | N/A | Sites in UTR |
| FASN         | NM_004104    | fatty acid synthase                                                 | 0 | 0 | 0 | 0 | 2 | 1 | 1 | 0 | hsa-miR-663  | -0.52 | N/A | Sites in UTR |
| CHRNA4       | NM_000744    | cholinergic receptor, nicotinic, alpha 4                            | 0 | 0 | 0 | 0 | 2 | 0 | 2 | 0 | hsa-miR-1908 | -0.52 | N/A | Sites in UTR |
| LRRC4B       | NM_001080457 | leucine rich repeat containing 4B                                   | 0 | 0 | 0 | 0 | 1 | 1 | 0 | 0 | hsa-miR-1908 | -0.51 | N/A | Sites in UTR |
| CORO6        | NM_032854    | coronin 6                                                           | 0 | 0 | 0 | 0 | 2 | 0 | 2 | 0 | hsa-miR-663  | -0.51 | N/A | Sites in UTR |
| PLXNA4       | NM_020911    | plexin A4                                                           | 0 | 0 | 0 | 0 | 2 | 2 | 0 | 0 | hsa-miR-1908 | -0.51 | N/A | Sites in UTR |
| P4HTM        | NM_177938    | prolyl 4-hydroxylase, transmembrane (endoplasmic reticulum)         | 0 | 0 | 0 | 0 | 1 | 1 | 0 | 0 | hsa-miR-1908 | -0.51 | N/A | Sites in UTR |
| LOC100507050 | NM_001195528 | hypothetical LOC100507050                                           | 0 | 0 | 0 | 0 | 2 | 0 | 2 | 0 | hsa-miR-1908 | -0.51 | N/A | Sites in UTR |
| TNIP2        | NM_001161527 | TNFAIP3 interacting protein 2                                       | 0 | 0 | 0 | 0 | 1 | 1 | 0 | 0 | hsa-miR-1908 | -0.51 | N/A | Sites in UTR |
| FAM84A       | NM_145175    | family with sequence similarity 84, member A                        | 0 | 0 | 0 | 0 | 2 | 1 | 1 | 0 | hsa-miR-1908 | -0.51 | N/A | Sites in UTR |

|          |              |                                                                     |   |   |   |   |   |   |   |   |              |       |     |              |
|----------|--------------|---------------------------------------------------------------------|---|---|---|---|---|---|---|---|--------------|-------|-----|--------------|
| CDKN2A   | NM_000077    | cyclin-dependent kinase inhibitor 2A (melanoma, p16, inhibits CDK4) | 0 | 0 | 0 | 0 | 1 | 1 | 0 | 0 | hsa-miR-663  | -0.51 | N/A | Sites in UTR |
| IQCE     | NM_001100390 | IQ motif containing E                                               | 0 | 0 | 0 | 0 | 1 | 1 | 0 | 0 | hsa-miR-1908 | -0.51 | N/A | Sites in UTR |
| HAPLN3   | NM_178232    | hyaluronan and proteoglycan link protein 3                          | 0 | 0 | 0 | 0 | 1 | 1 | 0 | 0 | hsa-miR-1908 | -0.51 | N/A | Sites in UTR |
| FAM43A   | NM_153690    | family with sequence similarity 43, member A                        | 0 | 0 | 0 | 0 | 1 | 1 | 0 | 0 | hsa-miR-1908 | -0.51 | N/A | Sites in UTR |
| SMCR8    | NM_144775    | Smith-Magenis syndrome chromosome region, candidate 8               | 0 | 0 | 0 | 0 | 1 | 1 | 0 | 0 | hsa-miR-1908 | -0.51 | N/A | Sites in UTR |
| GRM4     | NM_000841    | glutamate receptor, metabotropic 4                                  | 0 | 0 | 0 | 0 | 2 | 0 | 2 | 0 | hsa-miR-663  | -0.51 | N/A | Sites in UTR |
| ZBTB45   | NM_032792    | zinc finger and BTB domain containing 45                            | 0 | 0 | 0 | 0 | 2 | 0 | 1 | 1 | hsa-miR-663  | -0.51 | N/A | Sites in UTR |
| IPO9     | NM_018085    | importin 9                                                          | 0 | 0 | 0 | 0 | 2 | 0 | 2 | 0 | hsa-miR-1908 | -0.51 | N/A | Sites in UTR |
| MAD1L1   | NM_001013836 | MAD1 mitotic arrest deficient-like 1 (yeast)                        | 0 | 0 | 0 | 0 | 1 | 1 | 0 | 0 | hsa-miR-663  | -0.51 | N/A | Sites in UTR |
| EPO      | NM_000799    | erythropoietin                                                      | 0 | 0 | 0 | 0 | 1 | 1 | 0 | 0 | hsa-miR-663  | -0.5  | N/A | Sites in UTR |
| C9orf142 | NM_183241    | chromosome 9 open reading frame 142                                 | 0 | 0 | 0 | 0 | 1 | 1 | 0 | 0 | hsa-miR-1908 | -0.5  | N/A | Sites in UTR |
| FNBP1    | NM_015033    | formin binding protein 1                                            | 0 | 0 | 0 | 0 | 3 | 2 | 1 | 0 | hsa-miR-663  | -0.5  | N/A | Sites in UTR |
| PRKDC    | NM_001081640 | protein kinase, DNA-activated, catalytic polypeptide                | 0 | 0 | 0 | 0 | 1 | 1 | 0 | 0 | hsa-miR-663  | -0.5  | N/A | Sites in UTR |
| TSPAN9   | NM_001168320 | tetraspanin 9                                                       | 0 | 0 | 0 | 0 | 2 | 1 | 1 | 0 | hsa-miR-663  | -0.5  | N/A | Sites in UTR |
| C1orf201 | NM_001199012 | chromosome 1 open reading frame 201                                 | 0 | 0 | 0 | 0 | 1 | 1 | 0 | 0 | hsa-miR-1908 | -0.49 | N/A | Sites in UTR |
| RAB3A    | NM_002866    | RAB3A, member RAS oncogene family                                   | 0 | 0 | 0 | 0 | 2 | 0 | 2 | 0 | hsa-miR-663  | -0.49 | N/A | Sites in UTR |
| UBE2M    | NM_003969    | ubiquitin-conjugating enzyme E2M                                    | 1 | 1 | 0 | 0 | 0 | 0 | 0 | 0 | hsa-miR-1908 | -0.49 | N/A | Sites in UTR |
| NCDN     | NM_001014839 | neurochondrin                                                       | 1 | 1 | 0 | 0 | 0 | 0 | 0 | 0 | hsa-miR-1908 | -0.49 | N/A | Sites in UTR |
| CERS4    | NM_024552    | ceramide synthase 4                                                 | 0 | 0 | 0 | 0 | 1 | 1 | 0 | 0 | hsa-miR-1908 | -0.49 | N/A | Sites in UTR |
| TBX1     | NM_080647    | T-box 1                                                             | 0 | 0 | 0 | 0 | 2 | 0 | 2 | 0 | hsa-miR-663  | -0.49 | N/A | Sites in UTR |

|          |              |                                                                |   |   |   |   |   |   |   |   |              |       |     |              |
|----------|--------------|----------------------------------------------------------------|---|---|---|---|---|---|---|---|--------------|-------|-----|--------------|
| TOMM40   | NM_001128916 | translocase of outer mitochondrial membrane 40 homolog (yeast) | 0 | 0 | 0 | 0 | 2 | 1 | 1 | 0 | hsa-miR-1908 | -0.49 | N/A | Sites in UTR |
| SLC26A1  | NM_022042    | solute carrier family 26 (sulfate transporter), member 1       | 0 | 0 | 0 | 0 | 1 | 1 | 0 | 0 | hsa-miR-1908 | -0.49 | N/A | Sites in UTR |
| SNX8     | NM_013321    | sorting nexin 8                                                | 0 | 0 | 0 | 0 | 1 | 1 | 0 | 0 | hsa-miR-1908 | -0.49 | N/A | Sites in UTR |
| HRH3     | NM_007232    | histamine receptor H3                                          | 0 | 0 | 0 | 0 | 2 | 0 | 2 | 0 | hsa-miR-663  | -0.49 | N/A | Sites in UTR |
| ITGB4    | NM_000213    | integrin, beta 4                                               | 0 | 0 | 0 | 0 | 1 | 1 | 0 | 0 | hsa-miR-663  | -0.49 | N/A | Sites in UTR |
| PNMAL2   | NM_020709    | PNMA-like 2                                                    | 0 | 0 | 0 | 0 | 2 | 0 | 2 | 0 | hsa-miR-663  | -0.49 | N/A | Sites in UTR |
| IQSEC3   | NM_001170738 | IQ motif and Sec7 domain 3                                     | 0 | 0 | 0 | 0 | 4 | 0 | 2 | 2 | hsa-miR-1908 | -0.49 | N/A | Sites in UTR |
| SLC25A44 | NM_014655    | solute carrier family 25, member 44                            | 0 | 0 | 0 | 0 | 1 | 1 | 0 | 0 | hsa-miR-1908 | -0.49 | N/A | Sites in UTR |
| HNRNPUL1 | NM_007040    | heterogeneous nuclear ribonucleoprotein U-like 1               | 0 | 0 | 0 | 0 | 1 | 1 | 0 | 0 | hsa-miR-663  | -0.49 | N/A | Sites in UTR |
| FBXW5    | NM_018998    | F-box and WD repeat domain containing 5                        | 0 | 0 | 0 | 0 | 1 | 1 | 0 | 0 | hsa-miR-1908 | -0.49 | N/A | Sites in UTR |
| PPP1R12C | NM_017607    | protein phosphatase 1, regulatory (inhibitor) subunit 12C      | 0 | 0 | 0 | 0 | 2 | 0 | 1 | 1 | hsa-miR-663  | -0.49 | N/A | Sites in UTR |
| MNT      | NM_020310    | MAX binding protein                                            | 0 | 0 | 0 | 0 | 2 | 0 | 2 | 0 | hsa-miR-663  | -0.49 | N/A | Sites in UTR |
| SPTBN4   | NM_020971    | spectrin, beta, non-erythrocytic 4                             | 0 | 0 | 0 | 0 | 2 | 0 | 2 | 0 | hsa-miR-663  | -0.49 | N/A | Sites in UTR |
| GPER     | NM_001039966 | G protein-coupled estrogen receptor 1                          | 0 | 0 | 0 | 0 | 1 | 1 | 0 | 0 | hsa-miR-663  | -0.48 | N/A | Sites in UTR |
| CDHR1    | NM_033100    | cadherin-related family member 1                               | 0 | 0 | 0 | 0 | 1 | 1 | 0 | 0 | hsa-miR-1908 | -0.48 | N/A | Sites in UTR |
| SOX1     | NM_005986    | SRY (sex determining region Y)-box 1                           | 0 | 0 | 0 | 0 | 2 | 0 | 2 | 0 | hsa-miR-663  | -0.48 | N/A | Sites in UTR |
| H6PD     | NM_004285    | hexose-6-phosphate dehydrogenase (glucose 1-dehydrogenase)     | 0 | 0 | 0 | 0 | 1 | 1 | 0 | 0 | hsa-miR-663  | -0.48 | N/A | Sites in UTR |
| CYS1     | NM_001037160 | cystin 1                                                       | 0 | 0 | 0 | 0 | 1 | 1 | 0 | 0 | hsa-miR-1908 | -0.48 | N/A | Sites in UTR |
| RIN3     | NM_024832    | Ras and Rab interactor 3                                       | 0 | 0 | 0 | 0 | 2 | 0 | 2 | 0 | hsa-miR-1908 | -0.48 | N/A | Sites in UTR |
| ANKRD13B | NM_152345    | ankyrin repeat domain 13B                                      | 0 | 0 | 0 | 0 | 1 | 1 | 0 | 0 | hsa-miR-663  | -0.48 | N/A | Sites in UTR |

|          |              |                                                                                                          |   |   |   |   |   |   |   |   |              |       |     |              |
|----------|--------------|----------------------------------------------------------------------------------------------------------|---|---|---|---|---|---|---|---|--------------|-------|-----|--------------|
| MTSS1L   | NM_138383    | metastasis suppressor 1-like                                                                             | 0 | 0 | 0 | 0 | 2 | 0 | 2 | 0 | hsa-miR-663  | -0.48 | N/A | Sites in UTR |
| FADD     | NM_003824    | Fas (TNFRSF6)-associated via death domain                                                                | 0 | 0 | 0 | 0 | 1 | 1 | 0 | 0 | hsa-miR-1908 | -0.48 | N/A | Sites in UTR |
| FKBP15   | NM_015258    | FK506 binding protein 15, 133kDa                                                                         | 0 | 0 | 0 | 0 | 1 | 1 | 0 | 0 | hsa-miR-1908 | -0.48 | N/A | Sites in UTR |
| CSMD2    | NM_052896    | CUB and Sushi multiple domains 2                                                                         | 1 | 0 | 1 | 0 | 1 | 0 | 1 | 0 | hsa-miR-1908 | -0.48 | N/A | Sites in UTR |
| GRINA    | NM_000837    | glutamate receptor, ionotropic, N-methyl D-aspartate-associated protein 1 (glutamate binding)            | 0 | 0 | 0 | 0 | 1 | 1 | 0 | 0 | hsa-miR-663  | -0.48 | N/A | Sites in UTR |
| LRRK1    | NM_024652    | leucine-rich repeat kinase 1                                                                             | 0 | 0 | 0 | 0 | 1 | 1 | 0 | 0 | hsa-miR-663  | -0.48 | N/A | Sites in UTR |
| LMF1     | NM_022773    | lipase maturation factor 1                                                                               | 0 | 0 | 0 | 0 | 1 | 1 | 0 | 0 | hsa-miR-1908 | -0.48 | N/A | Sites in UTR |
| KLHL25   | NM_022480    | kelch-like 25 (Drosophila)                                                                               | 0 | 0 | 0 | 0 | 2 | 0 | 1 | 1 | hsa-miR-663  | -0.48 | N/A | Sites in UTR |
| GLTPD1   | NM_001029885 | glycolipid transfer protein domain containing 1                                                          | 0 | 0 | 0 | 0 | 2 | 0 | 2 | 0 | hsa-miR-663  | -0.48 | N/A | Sites in UTR |
| IRAK2    | NM_001570    | interleukin-1 receptor-associated kinase 2                                                               | 0 | 0 | 0 | 0 | 1 | 1 | 0 | 0 | hsa-miR-1908 | -0.48 | N/A | Sites in UTR |
| MINK1    | NM_001024937 | misshapen-like kinase 1                                                                                  | 1 | 1 | 0 | 0 | 0 | 0 | 0 | 0 | hsa-miR-1908 | -0.48 | N/A | Sites in UTR |
| FOXRED2  | NM_001102371 | FAD-dependent oxidoreductase domain containing 2                                                         | 0 | 0 | 0 | 0 | 2 | 0 | 1 | 1 | hsa-miR-1908 | -0.48 | N/A | Sites in UTR |
| PRELP    | NM_002725    | proline/arginine-rich end leucine-rich repeat protein                                                    | 0 | 0 | 0 | 0 | 2 | 1 | 0 | 1 | hsa-miR-663  | -0.48 | N/A | Sites in UTR |
| FLT1     | NM_002019    | fms-related tyrosine kinase 1 (vascular endothelial growth factor/vascular permeability factor receptor) | 0 | 0 | 0 | 0 | 1 | 1 | 0 | 0 | hsa-miR-663  | -0.48 | N/A | Sites in UTR |
| COL4A3   | NM_000091    | collagen, type IV, alpha 3 (Goodpasture antigen)                                                         | 0 | 0 | 0 | 0 | 1 | 1 | 0 | 0 | hsa-miR-1908 | -0.47 | N/A | Sites in UTR |
| TRIM62   | NM_018207    | tripartite motif containing 62                                                                           | 0 | 0 | 0 | 0 | 1 | 1 | 0 | 0 | hsa-miR-1908 | -0.47 | N/A | Sites in UTR |
| C16orf90 | NM_001080524 | chromosome 16 open reading frame 90                                                                      | 0 | 0 | 0 | 0 | 1 | 1 | 0 | 0 | hsa-miR-1908 | -0.47 | N/A | Sites in UTR |
| DDTL     | NM_001084393 | D-dopachrome tautomerase-like                                                                            | 0 | 0 | 0 | 0 | 1 | 1 | 0 | 0 | hsa-miR-663  | -0.47 | N/A | Sites in UTR |
| SLC32A1  | NM_080552    | solute carrier family 32 (GABA vesicular transporter), member 1                                          | 0 | 0 | 0 | 0 | 2 | 0 | 2 | 0 | hsa-miR-663  | -0.47 | N/A | Sites in UTR |
| FZD8     | NM_031866    | frizzled family receptor 8                                                                               | 0 | 0 | 0 | 0 | 2 | 0 | 1 | 1 | hsa-miR-663  | -0.47 | N/A | Sites in UTR |

|          |              |                                                                      |   |   |   |   |   |   |   |   |              |       |     |              |
|----------|--------------|----------------------------------------------------------------------|---|---|---|---|---|---|---|---|--------------|-------|-----|--------------|
| NCS1     | NM_001128826 | neuronal calcium sensor 1                                            | 0 | 0 | 0 | 0 | 3 | 0 | 2 | 1 | hsa-miR-1908 | -0.47 | N/A | Sites in UTR |
| SPI1     | NM_001080547 | spleen focus forming virus (SFFV) proviral integration oncogene spi1 | 0 | 0 | 0 | 0 | 2 | 1 | 1 | 0 | hsa-miR-663  | -0.47 | N/A | Sites in UTR |
| ARL8A    | NM_138795    | ADP-ribosylation factor-like 8A                                      | 0 | 0 | 0 | 0 | 2 | 0 | 2 | 0 | hsa-miR-663  | -0.47 | N/A | Sites in UTR |
| C16orf5  | NM_001199054 | chromosome 16 open reading frame 5                                   | 0 | 0 | 0 | 0 | 2 | 0 | 2 | 0 | hsa-miR-1908 | -0.47 | N/A | Sites in UTR |
| IGF2     | NM_000612    | insulin-like growth factor 2 (somatomedin A)                         | 0 | 0 | 0 | 0 | 2 | 1 | 1 | 0 | hsa-miR-663  | -0.47 | N/A | Sites in UTR |
| CDX1     | NM_001804    | caudal type homeobox 1                                               | 0 | 0 | 0 | 0 | 1 | 1 | 0 | 0 | hsa-miR-1908 | -0.47 | N/A | Sites in UTR |
| VAT1     | NM_006373    | vesicle amine transport protein 1 homolog (T. californica)           | 0 | 0 | 0 | 0 | 1 | 1 | 0 | 0 | hsa-miR-663  | -0.47 | N/A | Sites in UTR |
| OTOF     | NM_004802    | otoferlin                                                            | 0 | 0 | 0 | 0 | 2 | 0 | 1 | 1 | hsa-miR-1908 | -0.47 | N/A | Sites in UTR |
| DNM1     | NM_001005336 | dynamitin 1                                                          | 0 | 0 | 0 | 0 | 1 | 1 | 0 | 0 | hsa-miR-1908 | -0.47 | N/A | Sites in UTR |
| FAM18A   | NM_001079512 | family with sequence similarity 18, member A                         | 0 | 0 | 0 | 0 | 1 | 1 | 0 | 0 | hsa-miR-1908 | -0.47 | N/A | Sites in UTR |
| HOXC11   | NM_014212    | homeobox C11                                                         | 0 | 0 | 0 | 0 | 2 | 0 | 2 | 0 | hsa-miR-663  | -0.47 | N/A | Sites in UTR |
| LIME1    | NM_017806    | Lck interacting transmembrane adaptor 1                              | 0 | 0 | 0 | 0 | 2 | 0 | 2 | 0 | hsa-miR-663  | -0.47 | N/A | Sites in UTR |
| CDC42EP4 | NM_012121    | CDC42 effector protein (Rho GTPase binding) 4                        | 0 | 0 | 0 | 0 | 1 | 1 | 0 | 0 | hsa-miR-1908 | -0.47 | N/A | Sites in UTR |
| NKX3-2   | NM_001189    | NK3 homeobox 2                                                       | 0 | 0 | 0 | 0 | 1 | 1 | 0 | 0 | hsa-miR-1908 | -0.47 | N/A | Sites in UTR |
| RAD51B   | NM_133509    | RAD51 homolog B (S. cerevisiae)                                      | 0 | 0 | 0 | 0 | 1 | 1 | 0 | 0 | hsa-miR-1908 | -0.47 | N/A | Sites in UTR |
| DEF8     | NM_001242816 | differentially expressed in FDCP 8 homolog (mouse)                   | 0 | 0 | 0 | 0 | 2 | 0 | 1 | 1 | hsa-miR-663  | -0.47 | N/A | Sites in UTR |
| SUFU     | NM_016169    | suppressor of fused homolog (Drosophila)                             | 0 | 0 | 0 | 0 | 2 | 1 | 1 | 0 | hsa-miR-663  | -0.47 | N/A | Sites in UTR |
| CSF1     | NM_172212    | colony stimulating factor 1 (macrophage)                             | 0 | 0 | 0 | 0 | 1 | 1 | 0 | 0 | hsa-miR-663  | -0.47 | N/A | Sites in UTR |
| MFSD10   | NM_001120    | major facilitator superfamily domain containing 10                   | 0 | 0 | 0 | 0 | 1 | 1 | 0 | 0 | hsa-miR-663  | -0.47 | N/A | Sites in UTR |
| ZDHHC7   | NM_001145548 | zinc finger, DHHC-type containing 7                                  | 0 | 0 | 0 | 0 | 1 | 1 | 0 | 0 | hsa-miR-1908 | -0.47 | N/A | Sites in UTR |

|           |              |                                                          |   |   |   |   |   |   |   |   |              |       |     |              |
|-----------|--------------|----------------------------------------------------------|---|---|---|---|---|---|---|---|--------------|-------|-----|--------------|
| C14orf180 | NM_001008404 | chromosome 14 open reading frame 180                     | 0 | 0 | 0 | 0 | 1 | 1 | 0 | 0 | hsa-miR-663  | -0.47 | N/A | Sites in UTR |
| HAND2     | NM_021973    | heart and neural crest derivatives expressed 2           | 0 | 0 | 0 | 0 | 1 | 1 | 0 | 0 | hsa-miR-663  | -0.47 | N/A | Sites in UTR |
| SETD4     | NM_017438    | SET domain containing 4                                  | 0 | 0 | 0 | 0 | 1 | 1 | 0 | 0 | hsa-miR-663  | -0.46 | N/A | Sites in UTR |
| C2orf72   | NM_001144994 | chromosome 2 open reading frame 72                       | 0 | 0 | 0 | 0 | 2 | 0 | 2 | 0 | hsa-miR-663  | -0.46 | N/A | Sites in UTR |
| CC2D1A    | NM_017721    | coiled-coil and C2 domain containing 1A                  | 0 | 0 | 0 | 0 | 1 | 1 | 0 | 0 | hsa-miR-663  | -0.46 | N/A | Sites in UTR |
| ACAP3     | NM_030649    | ArfGAP with coiled-coil, ankyrin repeat and PH domains 3 | 0 | 0 | 0 | 0 | 2 | 0 | 2 | 0 | hsa-miR-663  | -0.46 | N/A | Sites in UTR |
| SERINC2   | NM_001199037 | serine incorporator 2                                    | 0 | 0 | 0 | 0 | 1 | 1 | 0 | 0 | hsa-miR-663  | -0.46 | N/A | Sites in UTR |
| ARHGDI1   | NM_001185077 | Rho GDP dissociation inhibitor (GDI) alpha               | 0 | 0 | 0 | 0 | 2 | 0 | 2 | 0 | hsa-miR-663  | -0.46 | N/A | Sites in UTR |
| CD79A     | NM_001783    | CD79a molecule, immunoglobulin-associated alpha          | 0 | 0 | 0 | 0 | 2 | 0 | 2 | 0 | hsa-miR-1908 | -0.46 | N/A | Sites in UTR |
| TTBK1     | NM_032538    | tau tubulin kinase 1                                     | 0 | 0 | 0 | 0 | 1 | 1 | 0 | 0 | hsa-miR-663  | -0.46 | N/A | Sites in UTR |
| LMX1B     | NM_001174146 | LIM homeobox transcription factor 1, beta                | 1 | 0 | 0 | 1 | 1 | 0 | 1 | 0 | hsa-miR-1908 | -0.46 | N/A | Sites in UTR |
| AGRN      | NM_198576    | agrin                                                    | 0 | 0 | 0 | 0 | 2 | 0 | 2 | 0 | hsa-miR-663  | -0.46 | N/A | Sites in UTR |
| RAX2      | NM_032753    | retina and anterior neural fold homeobox 2               | 0 | 0 | 0 | 0 | 1 | 1 | 0 | 0 | hsa-miR-663  | -0.46 | N/A | Sites in UTR |
| TMEM110   | NM_198563    | transmembrane protein 110                                | 0 | 0 | 0 | 0 | 1 | 1 | 0 | 0 | hsa-miR-1908 | -0.46 | N/A | Sites in UTR |
| ADAR      | NM_001025107 | adenosine deaminase, RNA-specific                        | 0 | 0 | 0 | 0 | 1 | 1 | 0 | 0 | hsa-miR-1908 | -0.46 | N/A | Sites in UTR |
| ZCCHC24   | NM_153367    | zinc finger, CCHC domain containing 24                   | 0 | 0 | 0 | 0 | 1 | 1 | 0 | 0 | hsa-miR-1908 | -0.46 | N/A | Sites in UTR |
| SPEF1     | NM_015417    | sperm flagellar 1                                        | 0 | 0 | 0 | 0 | 2 | 0 | 1 | 1 | hsa-miR-1908 | -0.46 | N/A | Sites in UTR |
| PCDHA9    | NM_031857    | protocadherin alpha 9                                    | 1 | 1 | 0 | 0 | 0 | 0 | 0 | 0 | hsa-miR-1908 | -0.45 | N/A | Sites in UTR |
| PCDHAC2   | NM_018899    | protocadherin alpha subfamily C, 2                       | 1 | 1 | 0 | 0 | 0 | 0 | 0 | 0 | hsa-miR-1908 | -0.45 | N/A | Sites in UTR |
| PCDHAC1   | NM_018898    | protocadherin alpha subfamily C, 1                       | 1 | 1 | 0 | 0 | 0 | 0 | 0 | 0 | hsa-miR-1908 | -0.45 | N/A | Sites in UTR |



|          |              |                                                                       |   |   |   |   |   |   |   |   |   |              |       |     |              |
|----------|--------------|-----------------------------------------------------------------------|---|---|---|---|---|---|---|---|---|--------------|-------|-----|--------------|
| PCDHA13  | NM_018904    | protocadherin alpha 13                                                | 1 | 1 | 0 | 0 | 0 | 0 | 0 | 0 | 0 | hsa-miR-1908 | -0.45 | N/A | Sites in UTR |
| PCDHA12  | NM_018903    | protocadherin alpha 12                                                | 1 | 1 | 0 | 0 | 0 | 0 | 0 | 0 | 0 | hsa-miR-1908 | -0.45 | N/A | Sites in UTR |
| PCDHA11  | NM_018902    | protocadherin alpha 11                                                | 1 | 1 | 0 | 0 | 0 | 0 | 0 | 0 | 0 | hsa-miR-1908 | -0.45 | N/A | Sites in UTR |
| PCDHA10  | NM_018901    | protocadherin alpha 10                                                | 1 | 1 | 0 | 0 | 0 | 0 | 0 | 0 | 0 | hsa-miR-1908 | -0.45 | N/A | Sites in UTR |
| PCDHA8   | NM_018911    | protocadherin alpha 8                                                 | 1 | 1 | 0 | 0 | 0 | 0 | 0 | 0 | 0 | hsa-miR-1908 | -0.45 | N/A | Sites in UTR |
| PCDHA7   | NM_018910    | protocadherin alpha 7                                                 | 1 | 1 | 0 | 0 | 0 | 0 | 0 | 0 | 0 | hsa-miR-1908 | -0.45 | N/A | Sites in UTR |
| PCDHA6   | NM_018909    | protocadherin alpha 6                                                 | 1 | 1 | 0 | 0 | 0 | 0 | 0 | 0 | 0 | hsa-miR-1908 | -0.45 | N/A | Sites in UTR |
| PCDHA5   | NM_018908    | protocadherin alpha 5                                                 | 1 | 1 | 0 | 0 | 0 | 0 | 0 | 0 | 0 | hsa-miR-1908 | -0.45 | N/A | Sites in UTR |
| PCDHA4   | NM_018907    | protocadherin alpha 4                                                 | 1 | 1 | 0 | 0 | 0 | 0 | 0 | 0 | 0 | hsa-miR-1908 | -0.45 | N/A | Sites in UTR |
| PCDHA3   | NM_018906    | protocadherin alpha 3                                                 | 1 | 1 | 0 | 0 | 0 | 0 | 0 | 0 | 0 | hsa-miR-1908 | -0.45 | N/A | Sites in UTR |
| PCDHA2   | NM_018905    | protocadherin alpha 2                                                 | 1 | 1 | 0 | 0 | 0 | 0 | 0 | 0 | 0 | hsa-miR-1908 | -0.45 | N/A | Sites in UTR |
| PCDHA1   | NM_018900    | protocadherin alpha 1                                                 | 1 | 1 | 0 | 0 | 0 | 0 | 0 | 0 | 0 | hsa-miR-1908 | -0.45 | N/A | Sites in UTR |
| PNCK     | NM_001039582 | pregnancy up-regulated non-ubiquitously expressed CaM kinase          | 0 | 0 | 0 | 0 | 1 | 1 | 0 | 0 | 0 | hsa-miR-663  | -0.45 | N/A | Sites in UTR |
| ZC3H12D  | NM_207360    | zinc finger CCCH-type containing 12D                                  | 0 | 0 | 0 | 0 | 2 | 0 | 1 | 1 | 1 | hsa-miR-663  | -0.45 | N/A | Sites in UTR |
| CBFA2T3  | NM_005187    | core-binding factor, runt domain, alpha subunit 2; translocated to, 3 | 0 | 0 | 0 | 0 | 2 | 0 | 1 | 1 | 1 | hsa-miR-663  | -0.45 | N/A | Sites in UTR |
| LLGL1    | NM_004140    | lethal giant larvae homolog 1 (Drosophila)                            | 0 | 0 | 0 | 0 | 2 | 0 | 1 | 1 | 1 | hsa-miR-663  | -0.45 | N/A | Sites in UTR |
| STX16    | NM_001001433 | syntaxin 16                                                           | 0 | 0 | 0 | 0 | 1 | 1 | 0 | 0 | 0 | hsa-miR-1908 | -0.45 | N/A | Sites in UTR |
| KIAA0889 | NM_080627    | KIAA0889                                                              | 0 | 0 | 0 | 0 | 2 | 0 | 1 | 1 | 1 | hsa-miR-663  | -0.45 | N/A | Sites in UTR |
| PLIN4    | NM_001080400 | perilipin 4                                                           | 0 | 0 | 0 | 0 | 2 | 0 | 1 | 1 | 1 | hsa-miR-1908 | -0.45 | N/A | Sites in UTR |
| C1QL1    | NM_006688    | complement component 1, q subcomponent-like 1                         | 0 | 0 | 0 | 0 | 2 | 0 | 2 | 0 | 0 | hsa-miR-663  | -0.45 | N/A | Sites in UTR |

|             |              |                                                                                 |   |   |   |   |   |   |   |   |              |       |     |              |
|-------------|--------------|---------------------------------------------------------------------------------|---|---|---|---|---|---|---|---|--------------|-------|-----|--------------|
| CDK5R1      | NM_003885    | cyclin-dependent kinase 5, regulatory subunit 1 (p35)                           | 0 | 0 | 0 | 0 | 1 | 1 | 0 | 0 | hsa-miR-663  | -0.45 | N/A | Sites in UTR |
| TIMM13      | NM_012458    | translocase of inner mitochondrial membrane 13 homolog (yeast)                  | 0 | 0 | 0 | 0 | 2 | 0 | 1 | 1 | hsa-miR-1908 | -0.45 | N/A | Sites in UTR |
| SH3GL1      | NM_001199943 | SH3-domain GRB2-like 1                                                          | 0 | 0 | 0 | 0 | 3 | 0 | 3 | 0 | hsa-miR-1908 | -0.44 | N/A | Sites in UTR |
| SORBS3      | NM_001018003 | sorbin and SH3 domain containing 3                                              | 0 | 0 | 0 | 0 | 2 | 0 | 2 | 0 | hsa-miR-1908 | -0.44 | N/A | Sites in UTR |
| P2RY11      | NM_002566    | purinergic receptor P2Y, G-protein coupled, 11                                  | 0 | 0 | 0 | 0 | 1 | 1 | 0 | 0 | hsa-miR-663  | -0.44 | N/A | Sites in UTR |
| PPAN-P2RY11 | NM_001040664 | PPAN-P2RY11 readthrough                                                         | 0 | 0 | 0 | 0 | 1 | 1 | 0 | 0 | hsa-miR-663  | -0.44 | N/A | Sites in UTR |
| BARHL1      | NM_020064    | BarH-like homeobox 1                                                            | 0 | 0 | 0 | 0 | 1 | 1 | 0 | 0 | hsa-miR-663  | -0.44 | N/A | Sites in UTR |
| RIMS3       | NM_014747    | regulating synaptic membrane exocytosis 3                                       | 0 | 0 | 0 | 0 | 2 | 1 | 1 | 0 | hsa-miR-1908 | -0.44 | N/A | Sites in UTR |
| SLC25A1     | NM_005984    | solute carrier family 25 (mitochondrial carrier; citrate transporter), member 1 | 0 | 0 | 0 | 0 | 2 | 0 | 1 | 1 | hsa-miR-663  | -0.44 | N/A | Sites in UTR |
| AK3         | NM_001199852 | adenylate kinase 3                                                              | 0 | 0 | 0 | 0 | 1 | 1 | 0 | 0 | hsa-miR-1908 | -0.44 | N/A | Sites in UTR |
| C15orf41    | NM_001130010 | chromosome 15 open reading frame 41                                             | 0 | 0 | 0 | 0 | 1 | 1 | 0 | 0 | hsa-miR-1908 | -0.44 | N/A | Sites in UTR |
| SNAI3       | NM_178310    | snail homolog 3 (Drosophila)                                                    | 0 | 0 | 0 | 0 | 1 | 1 | 0 | 0 | hsa-miR-1908 | -0.44 | N/A | Sites in UTR |
| LRCH4       | NM_002319    | leucine-rich repeats and calponin homology (CH) domain containing 4             | 0 | 0 | 0 | 0 | 2 | 0 | 2 | 0 | hsa-miR-1908 | -0.44 | N/A | Sites in UTR |
| AATF        | NM_012138    | apoptosis antagonizing transcription factor                                     | 0 | 0 | 0 | 0 | 1 | 0 | 1 | 0 | hsa-miR-663  | -0.44 | N/A | Sites in UTR |
| MCF2L2      | NM_015078    | MCF.2 cell line derived transforming sequence-like 2                            | 0 | 0 | 0 | 0 | 2 | 0 | 1 | 1 | hsa-miR-1908 | -0.44 | N/A | Sites in UTR |
| PLEKHG4B    | NM_052909    | pleckstrin homology domain containing, family G (with RhoGef domain) member 4B  | 0 | 0 | 0 | 0 | 3 | 1 | 2 | 0 | hsa-miR-1908 | -0.44 | N/A | Sites in UTR |
| LLGL2       | NM_001031803 | lethal giant larvae homolog 2 (Drosophila)                                      | 0 | 0 | 0 | 0 | 1 | 1 | 0 | 0 | hsa-miR-663  | -0.43 | N/A | Sites in UTR |
| SLC2A4RG    | NM_020062    | SLC2A4 regulator                                                                | 0 | 0 | 0 | 0 | 1 | 1 | 0 | 0 | hsa-miR-663  | -0.43 | N/A | Sites in UTR |
| SKI         | NM_003036    | v-ski sarcoma viral oncogene homolog (avian)                                    | 0 | 0 | 0 | 0 | 2 | 0 | 2 | 0 | hsa-miR-663  | -0.43 | N/A | Sites in UTR |
| NCAM1       | NM_001076682 | neural cell adhesion molecule 1                                                 | 0 | 0 | 0 | 0 | 1 | 1 | 0 | 0 | hsa-miR-1908 | -0.43 | N/A | Sites in UTR |

|          |              |                                                                                     |   |   |   |   |   |   |   |   |              |       |     |              |
|----------|--------------|-------------------------------------------------------------------------------------|---|---|---|---|---|---|---|---|--------------|-------|-----|--------------|
| MED15    | NM_001003891 | mediator complex subunit 15                                                         | 0 | 0 | 0 | 0 | 1 | 1 | 0 | 0 | hsa-miR-663  | -0.43 | N/A | Sites in UTR |
| SLC6A1   | NM_003042    | solute carrier family 6 (neurotransmitter transporter, GABA), member 1              | 0 | 0 | 0 | 0 | 2 | 0 | 1 | 1 | hsa-miR-1908 | -0.43 | N/A | Sites in UTR |
| GREM2    | NM_022469    | gremlin 2                                                                           | 0 | 0 | 0 | 0 | 2 | 0 | 2 | 0 | hsa-miR-663  | -0.43 | N/A | Sites in UTR |
| ZNF275   | NM_001080485 | zinc finger protein 275                                                             | 0 | 0 | 0 | 0 | 2 | 1 | 1 | 0 | hsa-miR-1908 | -0.43 | N/A | Sites in UTR |
| ATP1B2   | NM_001678    | ATPase, Na <sup>+</sup> /K <sup>+</sup> transporting, beta 2 polypeptide            | 0 | 0 | 0 | 0 | 1 | 1 | 0 | 0 | hsa-miR-663  | -0.43 | N/A | Sites in UTR |
| TNFRSF8  | NM_001243    | tumor necrosis factor receptor superfamily, member 8                                | 0 | 0 | 0 | 0 | 1 | 1 | 0 | 0 | hsa-miR-663  | -0.43 | N/A | Sites in UTR |
| ST14     | NM_021978    | suppression of tumorigenicity 14 (colon carcinoma)                                  | 0 | 0 | 0 | 0 | 1 | 1 | 0 | 0 | hsa-miR-1908 | -0.43 | N/A | Sites in UTR |
| EXOC4    | NM_021807    | exocyst complex component 4                                                         | 0 | 0 | 0 | 0 | 1 | 1 | 0 | 0 | hsa-miR-663  | -0.43 | N/A | Sites in UTR |
| RILPL1   | NM_178314    | Rab interacting lysosomal protein-like 1                                            | 0 | 0 | 0 | 0 | 2 | 0 | 0 | 2 | hsa-miR-1908 | -0.43 | N/A | Sites in UTR |
| ITPKB    | NM_002221    | inositol-trisphosphate 3-kinase B                                                   | 0 | 0 | 0 | 0 | 2 | 0 | 2 | 0 | hsa-miR-663  | -0.43 | N/A | Sites in UTR |
| C17orf39 | NM_024052    | chromosome 17 open reading frame 39                                                 | 0 | 0 | 0 | 0 | 1 | 1 | 0 | 0 | hsa-miR-663  | -0.43 | N/A | Sites in UTR |
| KIFC3    | NM_001130099 | kinesin family member C3                                                            | 0 | 0 | 0 | 0 | 2 | 0 | 1 | 1 | hsa-miR-1908 | -0.43 | N/A | Sites in UTR |
| KCNQ4    | NM_004700    | potassium voltage-gated channel, KQT-like subfamily, member 4                       | 0 | 0 | 0 | 0 | 2 | 0 | 1 | 1 | hsa-miR-663  | -0.43 | N/A | Sites in UTR |
| SLC11A1  | NM_000578    | solute carrier family 11 (proton-coupled divalent metal ion transporters), member 1 | 0 | 0 | 0 | 0 | 2 | 1 | 0 | 1 | hsa-miR-663  | -0.43 | N/A | Sites in UTR |
| EVC      | NM_153717    | Ellis van Creveld syndrome                                                          | 0 | 0 | 0 | 0 | 1 | 1 | 0 | 0 | hsa-miR-663  | -0.43 | N/A | Sites in UTR |
| ZDHHC8   | NM_013373    | zinc finger, DHHC-type containing 8                                                 | 0 | 0 | 0 | 0 | 1 | 1 | 0 | 0 | hsa-miR-663  | -0.43 | N/A | Sites in UTR |
| LIMS2    | NM_001136037 | LIM and senescent cell antigen-like domains 2                                       | 0 | 0 | 0 | 0 | 2 | 0 | 2 | 0 | hsa-miR-1908 | -0.43 | N/A | Sites in UTR |
| CERS1    | NM_021267    | ceramide synthase 1                                                                 | 0 | 0 | 0 | 0 | 3 | 0 | 3 | 0 | hsa-miR-663  | -0.43 | N/A | Sites in UTR |
| TMEM184B | NM_001195071 | transmembrane protein 184B                                                          | 0 | 0 | 0 | 0 | 1 | 1 | 0 | 0 | hsa-miR-663  | -0.42 | N/A | Sites in UTR |
| SOST     | NM_025237    | sclerostin                                                                          | 0 | 0 | 0 | 0 | 2 | 0 | 1 | 1 | hsa-miR-663  | -0.42 | N/A | Sites in UTR |

|         |              |                                                                                                           |   |   |   |   |   |   |   |   |              |       |     |              |
|---------|--------------|-----------------------------------------------------------------------------------------------------------|---|---|---|---|---|---|---|---|--------------|-------|-----|--------------|
| TNRC18  | NM_001080495 | trinucleotide repeat containing 18                                                                        | 0 | 0 | 0 | 0 | 2 | 0 | 2 | 0 | hsa-miR-1908 | -0.42 | N/A | Sites in UTR |
| PALM    | NM_001040134 | paralemmin                                                                                                | 0 | 0 | 0 | 0 | 1 | 1 | 0 | 0 | hsa-miR-663  | -0.42 | N/A | Sites in UTR |
| ZNF653  | NM_138783    | zinc finger protein 653                                                                                   | 0 | 0 | 0 | 0 | 2 | 0 | 2 | 0 | hsa-miR-1908 | -0.42 | N/A | Sites in UTR |
| CALML3  | NM_005185    | calmodulin-like 3                                                                                         | 0 | 0 | 0 | 0 | 1 | 1 | 0 | 0 | hsa-miR-663  | -0.42 | N/A | Sites in UTR |
| AZU1    | NM_001700    | azurocidin 1                                                                                              | 0 | 0 | 0 | 0 | 2 | 0 | 2 | 0 | hsa-miR-663  | -0.42 | N/A | Sites in UTR |
| FAM22G  | NM_001045477 | family with sequence similarity 22, member G                                                              | 0 | 0 | 0 | 0 | 2 | 0 | 2 | 0 | hsa-miR-1908 | -0.42 | N/A | Sites in UTR |
| HSPA12B | NM_001197327 | heat shock 70kD protein 12B                                                                               | 0 | 0 | 0 | 0 | 2 | 0 | 1 | 1 | hsa-miR-663  | -0.42 | N/A | Sites in UTR |
| PRR12   | NM_020719    | proline rich 12                                                                                           | 0 | 0 | 0 | 0 | 3 | 0 | 3 | 0 | hsa-miR-663  | -0.42 | N/A | Sites in UTR |
| DGKQ    | NM_001347    | diacylglycerol kinase, theta 110kDa                                                                       | 0 | 0 | 0 | 0 | 2 | 0 | 1 | 1 | hsa-miR-1908 | -0.42 | N/A | Sites in UTR |
| EFNA5   | NM_001962    | ephrin-A5                                                                                                 | 0 | 0 | 0 | 0 | 2 | 0 | 2 | 0 | hsa-miR-663  | -0.42 | N/A | Sites in UTR |
| NXPH3   | NM_007225    | neurexophilin 3                                                                                           | 0 | 0 | 0 | 0 | 1 | 1 | 0 | 0 | hsa-miR-663  | -0.42 | N/A | Sites in UTR |
| NRGN    | NM_001126181 | neurogranin (protein kinase C substrate, RC3)                                                             | 1 | 0 | 1 | 0 | 1 | 0 | 1 | 0 | hsa-miR-663  | -0.42 | N/A | Sites in UTR |
| MYLK2   | NM_033118    | myosin light chain kinase 2                                                                               | 0 | 0 | 0 | 0 | 1 | 1 | 0 | 0 | hsa-miR-1908 | -0.42 | N/A | Sites in UTR |
| PPFIA3  | NM_003660    | protein tyrosine phosphatase, receptor type, f polypeptide (PTPRF), interacting protein (liprin), alpha 3 | 1 | 0 | 1 | 0 | 1 | 0 | 1 | 0 | hsa-miR-1908 | -0.42 | N/A | Sites in UTR |
| MDM4    | NM_001204171 | Mdm4 p53 binding protein homolog (mouse)                                                                  | 0 | 0 | 0 | 0 | 3 | 0 | 2 | 1 | hsa-miR-663  | -0.41 | N/A | Sites in UTR |
| FLRT1   | NM_013280    | fibronectin leucine rich transmembrane protein 1                                                          | 0 | 0 | 0 | 0 | 2 | 0 | 1 | 1 | hsa-miR-663  | -0.41 | N/A | Sites in UTR |
| VASH1   | NM_014909    | vasohibin 1                                                                                               | 0 | 0 | 0 | 0 | 1 | 1 | 0 | 0 | hsa-miR-1908 | -0.41 | N/A | Sites in UTR |
| CLEC2L  | NM_001080511 | C-type lectin domain family 2, member L                                                                   | 0 | 0 | 0 | 0 | 2 | 0 | 2 | 0 | hsa-miR-663  | -0.41 | N/A | Sites in UTR |
| CYBASC3 | NM_001161452 | cytochrome b, ascorbate dependent 3                                                                       | 0 | 0 | 0 | 0 | 1 | 1 | 0 | 0 | hsa-miR-663  | -0.41 | N/A | Sites in UTR |
| FOXP2   | NM_004514    | forkhead box K2                                                                                           | 0 | 0 | 0 | 0 | 2 | 0 | 1 | 1 | hsa-miR-663  | -0.41 | N/A | Sites in UTR |

|          |              |                                                                                                |   |   |   |   |   |   |   |   |              |       |     |              |
|----------|--------------|------------------------------------------------------------------------------------------------|---|---|---|---|---|---|---|---|--------------|-------|-----|--------------|
| IQSEC2   | NM_001111125 | IQ motif and Sec7 domain 2                                                                     | 0 | 0 | 0 | 0 | 1 | 1 | 0 | 0 | hsa-miR-1908 | -0.41 | N/A | Sites in UTR |
| C12orf61 | NM_175895    | chromosome 12 open reading frame 61                                                            | 0 | 0 | 0 | 0 | 1 | 1 | 0 | 0 | hsa-miR-1908 | -0.41 | N/A | Sites in UTR |
| GALNT2   | NM_004481    | UDP-N-acetyl-alpha-D-galactosamine:polypeptide N-acetylgalactosaminyltransferase 2 (GalNAc-T2) | 0 | 0 | 0 | 0 | 3 | 0 | 3 | 0 | hsa-miR-663  | -0.41 | N/A | Sites in UTR |
| SCN1B    | NM_001037    | sodium channel, voltage-gated, type I, beta                                                    | 0 | 0 | 0 | 0 | 3 | 0 | 3 | 0 | hsa-miR-1908 | -0.41 | N/A | Sites in UTR |
| HOMER2   | NM_004839    | homer homolog 2 (Drosophila)                                                                   | 0 | 0 | 0 | 0 | 2 | 0 | 2 | 0 | hsa-miR-663  | -0.41 | N/A | Sites in UTR |
| LRRC27   | NM_001143757 | leucine rich repeat containing 27                                                              | 0 | 0 | 0 | 0 | 2 | 0 | 0 | 2 | hsa-miR-663  | -0.41 | N/A | Sites in UTR |
| C1QTNF8  | NM_207419    | C1q and tumor necrosis factor related protein 8                                                | 0 | 0 | 0 | 0 | 2 | 0 | 0 | 2 | hsa-miR-663  | -0.41 | N/A | Sites in UTR |
| ANAPC2   | NM_013366    | anaphase promoting complex subunit 2                                                           | 0 | 0 | 0 | 0 | 2 | 0 | 1 | 1 | hsa-miR-663  | -0.41 | N/A | Sites in UTR |
| CLCN7    | NM_001114331 | chloride channel 7                                                                             | 0 | 0 | 0 | 0 | 2 | 0 | 2 | 0 | hsa-miR-1908 | -0.41 | N/A | Sites in UTR |
| SLC34A2  | NM_001177998 | solute carrier family 34 (sodium phosphate), member 2                                          | 0 | 0 | 0 | 0 | 2 | 0 | 2 | 0 | hsa-miR-663  | -0.41 | N/A | Sites in UTR |
| CALCOCO2 | NM_005831    | calcium binding and coiled-coil domain 2                                                       | 0 | 0 | 0 | 0 | 1 | 1 | 0 | 0 | hsa-miR-663  | -0.41 | N/A | Sites in UTR |
| NCLN     | NM_020170    | nicalin                                                                                        | 0 | 0 | 0 | 0 | 2 | 0 | 2 | 0 | hsa-miR-663  | -0.4  | N/A | Sites in UTR |
| SP2      | NM_003110    | Sp2 transcription factor                                                                       | 0 | 0 | 0 | 0 | 1 | 1 | 0 | 0 | hsa-miR-1908 | -0.4  | N/A | Sites in UTR |
| TNRC6C   | NM_001142640 | trinucleotide repeat containing 6C                                                             | 0 | 0 | 0 | 0 | 1 | 1 | 0 | 0 | hsa-miR-663  | -0.4  | N/A | Sites in UTR |
| FKBP7    | NM_001135212 | FK506 binding protein 7                                                                        | 0 | 0 | 0 | 0 | 2 | 0 | 1 | 1 | hsa-miR-663  | -0.4  | N/A | Sites in UTR |
| CYP4F22  | NM_173483    | cytochrome P450, family 4, subfamily F, polypeptide 22                                         | 1 | 0 | 1 | 0 | 1 | 0 | 1 | 0 | hsa-miR-663  | -0.4  | N/A | Sites in UTR |
| ELAVL3   | NM_001420    | ELAV (embryonic lethal, abnormal vision, Drosophila)-like 3 (Hu antigen C)                     | 0 | 0 | 0 | 0 | 3 | 1 | 2 | 0 | hsa-miR-663  | -0.4  | N/A | Sites in UTR |
| ASB6     | NM_001202403 | ankyrin repeat and SOCS box containing 6                                                       | 0 | 0 | 0 | 0 | 3 | 0 | 2 | 1 | hsa-miR-1908 | -0.4  | N/A | Sites in UTR |
| PHF21B   | NM_001135862 | PHD finger protein 21B                                                                         | 0 | 0 | 0 | 0 | 1 | 1 | 0 | 0 | hsa-miR-663  | -0.4  | N/A | Sites in UTR |
| PDDC1    | NM_182612    | Parkinson disease 7 domain containing 1                                                        | 0 | 0 | 0 | 0 | 2 | 0 | 2 | 0 | hsa-miR-1908 | -0.4  | N/A | Sites in UTR |

|          |              |                                                                                        |   |   |   |   |   |   |   |   |              |       |     |              |
|----------|--------------|----------------------------------------------------------------------------------------|---|---|---|---|---|---|---|---|--------------|-------|-----|--------------|
| TMEM63C  | NM_020431    | transmembrane protein 63C                                                              | 0 | 0 | 0 | 0 | 1 | 1 | 0 | 0 | hsa-miR-1908 | -0.4  | N/A | Sites in UTR |
| HCN2     | NM_001194    | hyperpolarization activated cyclic nucleotide-gated potassium channel 2                | 0 | 0 | 0 | 0 | 2 | 0 | 2 | 0 | hsa-miR-663  | -0.4  | N/A | Sites in UTR |
| MYADM    | NM_001020818 | myeloid-associated differentiation marker                                              | 0 | 0 | 0 | 0 | 2 | 0 | 2 | 0 | hsa-miR-663  | -0.4  | N/A | Sites in UTR |
| CSDC2    | NM_014460    | cold shock domain containing C2, RNA binding                                           | 0 | 0 | 0 | 0 | 1 | 1 | 0 | 0 | hsa-miR-663  | -0.4  | N/A | Sites in UTR |
| RGMA     | NM_001166283 | RGM domain family, member A                                                            | 0 | 0 | 0 | 0 | 2 | 0 | 1 | 1 | hsa-miR-663  | -0.4  | N/A | Sites in UTR |
| MGAT4B   | NM_014275    | mannosyl (alpha-1,3-)-glycoprotein beta-1,4-N-acetylglucosaminyltransferase, isozyme B | 0 | 0 | 0 | 0 | 2 | 0 | 2 | 0 | hsa-miR-663  | -0.4  | N/A | Sites in UTR |
| CMTM3    | NM_144601    | CKLF-like MARVEL transmembrane domain containing 3                                     | 0 | 0 | 0 | 0 | 1 | 1 | 0 | 0 | hsa-miR-663  | -0.39 | N/A | Sites in UTR |
| TGFB1    | NM_000660    | transforming growth factor, beta 1                                                     | 3 | 0 | 3 | 0 | 0 | 0 | 0 | 0 | hsa-miR-663  | -0.39 | N/A | Sites in UTR |
| C16orf55 | NM_153025    | chromosome 16 open reading frame 55                                                    | 0 | 0 | 0 | 0 | 2 | 0 | 2 | 0 | hsa-miR-1908 | -0.39 | N/A | Sites in UTR |
| UBE2NL   | NM_001012989 | ubiquitin-conjugating enzyme E2N-like                                                  | 0 | 0 | 0 | 0 | 1 | 0 | 1 | 0 | hsa-miR-1908 | -0.39 | N/A | Sites in UTR |
| NBEAL2   | NM_015175    | neurobeachin-like 2                                                                    | 0 | 0 | 0 | 0 | 2 | 0 | 2 | 0 | hsa-miR-663  | -0.39 | N/A | Sites in UTR |
| CTAGE5   | NM_005930    | CTAGE family, member 5                                                                 | 0 | 0 | 0 | 0 | 1 | 0 | 1 | 0 | hsa-miR-663  | -0.39 | N/A | Sites in UTR |
| KIAA0247 | NM_014734    | KIAA0247                                                                               | 0 | 0 | 0 | 0 | 2 | 0 | 1 | 1 | hsa-miR-663  | -0.39 | N/A | Sites in UTR |
| WBP2     | NM_012478    | WW domain binding protein 2                                                            | 0 | 0 | 0 | 0 | 1 | 1 | 0 | 0 | hsa-miR-663  | -0.39 | N/A | Sites in UTR |
| DLX2     | NM_004405    | distal-less homeobox 2                                                                 | 0 | 0 | 0 | 0 | 2 | 0 | 2 | 0 | hsa-miR-1908 | -0.39 | N/A | Sites in UTR |
| CABLES1  | NM_001100619 | Cdk5 and Abl enzyme substrate 1                                                        | 0 | 0 | 0 | 0 | 1 | 1 | 0 | 0 | hsa-miR-663  | -0.39 | N/A | Sites in UTR |
| ARFGAP1  | NM_018209    | ADP-ribosylation factor GTPase activating protein 1                                    | 0 | 0 | 0 | 0 | 2 | 0 | 1 | 1 | hsa-miR-1908 | -0.39 | N/A | Sites in UTR |
| GRIN1    | NM_000832    | glutamate receptor, ionotropic, N-methyl D-aspartate 1                                 | 0 | 0 | 0 | 0 | 2 | 0 | 1 | 1 | hsa-miR-663  | -0.39 | N/A | Sites in UTR |
| CCR1     | NM_001295    | chemokine (C-C motif) receptor 1                                                       | 0 | 0 | 0 | 0 | 1 | 1 | 0 | 0 | hsa-miR-663  | -0.39 | N/A | Sites in UTR |
| PAFAH1B2 | NM_002572    | platelet-activating factor acetylhydrolase 1b, catalytic subunit 2 (30kDa)             | 0 | 0 | 0 | 0 | 1 | 1 | 0 | 0 | hsa-miR-663  | -0.39 | N/A | Sites in UTR |

|           |              |                                                                               |   |   |   |   |   |   |   |   |              |       |     |              |
|-----------|--------------|-------------------------------------------------------------------------------|---|---|---|---|---|---|---|---|--------------|-------|-----|--------------|
| VSX2      | NM_182894    | visual system homeobox 2                                                      | 0 | 0 | 0 | 0 | 1 | 1 | 0 | 0 | hsa-miR-1908 | -0.38 | N/A | Sites in UTR |
| PFAS      | NM_012393    | phosphoribosylformylglycinamide synthase                                      | 0 | 0 | 0 | 0 | 1 | 0 | 1 | 0 | hsa-miR-1908 | -0.38 | N/A | Sites in UTR |
| SPRED2    | NM_001128210 | sprouty-related, EVH1 domain containing 2                                     | 0 | 0 | 0 | 0 | 2 | 0 | 1 | 1 | hsa-miR-663  | -0.38 | N/A | Sites in UTR |
| KIF13B    | NM_015254    | kinesin family member 13B                                                     | 0 | 0 | 0 | 0 | 1 | 1 | 0 | 0 | hsa-miR-663  | -0.38 | N/A | Sites in UTR |
| NFIC      | NM_005597    | nuclear factor I/C (CCAAT-binding transcription factor)                       | 0 | 0 | 0 | 0 | 1 | 1 | 0 | 0 | hsa-miR-1908 | -0.38 | N/A | Sites in UTR |
| C17orf107 | NM_001145536 | chromosome 17 open reading frame 107                                          | 0 | 0 | 0 | 0 | 3 | 0 | 3 | 0 | hsa-miR-663  | -0.38 | N/A | Sites in UTR |
| LMTK3     | NM_001080434 | lemur tyrosine kinase 3                                                       | 0 | 0 | 0 | 0 | 2 | 0 | 2 | 0 | hsa-miR-1908 | -0.38 | N/A | Sites in UTR |
| TCF20     | NM_005650    | transcription factor 20 (AR1)                                                 | 0 | 0 | 0 | 0 | 2 | 0 | 2 | 0 | hsa-miR-663  | -0.38 | N/A | Sites in UTR |
| C19orf26  | NM_152769    | chromosome 19 open reading frame 26                                           | 0 | 0 | 0 | 0 | 2 | 0 | 2 | 0 | hsa-miR-1908 | -0.38 | N/A | Sites in UTR |
| SMAD3     | NM_001145102 | SMAD family member 3                                                          | 0 | 0 | 0 | 0 | 2 | 1 | 1 | 0 | hsa-miR-663  | -0.38 | N/A | Sites in UTR |
| KLC2      | NM_001134774 | kinesin light chain 2                                                         | 1 | 0 | 1 | 0 | 1 | 0 | 1 | 0 | hsa-miR-663  | -0.38 | N/A | Sites in UTR |
| OLFM2     | NM_058164    | olfactomedin 2                                                                | 0 | 0 | 0 | 0 | 1 | 0 | 1 | 0 | hsa-miR-663  | -0.38 | N/A | Sites in UTR |
| LOC643988 | NM_001242659 | hypothetical LOC643988                                                        | 0 | 0 | 0 | 0 | 2 | 0 | 1 | 1 | hsa-miR-1908 | -0.38 | N/A | Sites in UTR |
| SLC25A22  | NM_001191060 | solute carrier family 25 (mitochondrial carrier: glutamate), member 22        | 0 | 0 | 0 | 0 | 2 | 0 | 1 | 1 | hsa-miR-663  | -0.38 | N/A | Sites in UTR |
| PLEKHG5   | NM_001042663 | pleckstrin homology domain containing, family G (with RhoGef domain) member 5 | 1 | 0 | 1 | 0 | 1 | 0 | 1 | 0 | hsa-miR-663  | -0.38 | N/A | Sites in UTR |
| GPD1      | NM_005276    | glycerol-3-phosphate dehydrogenase 1 (soluble)                                | 0 | 0 | 0 | 0 | 1 | 1 | 0 | 0 | hsa-miR-663  | -0.38 | N/A | Sites in UTR |
| ARID3B    | NM_006465    | AT rich interactive domain 3B (BRIGHT-like)                                   | 0 | 0 | 0 | 0 | 1 | 1 | 0 | 0 | hsa-miR-663  | -0.38 | N/A | Sites in UTR |
| OTP       | NM_032109    | orthopedia homeobox                                                           | 0 | 0 | 0 | 0 | 2 | 0 | 0 | 2 | hsa-miR-1908 | -0.38 | N/A | Sites in UTR |
| GRB2      | NM_002086    | growth factor receptor-bound protein 2                                        | 0 | 0 | 0 | 0 | 2 | 0 | 2 | 0 | hsa-miR-663  | -0.37 | N/A | Sites in UTR |
| ZNF628    | NM_033113    | zinc finger protein 628                                                       | 0 | 0 | 0 | 0 | 1 | 0 | 1 | 0 | hsa-miR-663  | -0.37 | N/A | Sites in UTR |

|          |              |                                                          |   |   |   |   |   |   |   |   |              |       |     |              |
|----------|--------------|----------------------------------------------------------|---|---|---|---|---|---|---|---|--------------|-------|-----|--------------|
| CD40LG   | NM_000074    | CD40 ligand                                              | 0 | 0 | 0 | 0 | 1 | 1 | 0 | 0 | hsa-miR-663  | -0.37 | N/A | Sites in UTR |
| JUNB     | NM_002229    | jun B proto-oncogene                                     | 1 | 0 | 1 | 0 | 1 | 0 | 1 | 0 | hsa-miR-663  | -0.37 | N/A | Sites in UTR |
| MAPK8IP3 | NM_001040439 | mitogen-activated protein kinase 8 interacting protein 3 | 0 | 0 | 0 | 0 | 2 | 0 | 2 | 0 | hsa-miR-1908 | -0.37 | N/A | Sites in UTR |
| MMP24    | NM_006690    | matrix metalloproteinase 24 (membrane-inserted)          | 0 | 0 | 0 | 0 | 2 | 0 | 1 | 1 | hsa-miR-663  | -0.37 | N/A | Sites in UTR |
| CIAO1    | NM_004804    | cytosolic iron-sulfur protein assembly 1                 | 0 | 0 | 0 | 0 | 1 | 0 | 1 | 0 | hsa-miR-1908 | -0.37 | N/A | Sites in UTR |
| FAM83H   | NM_198488    | family with sequence similarity 83, member H             | 0 | 0 | 0 | 0 | 2 | 0 | 2 | 0 | hsa-miR-663  | -0.37 | N/A | Sites in UTR |
| STARD3   | NM_001165937 | StAR-related lipid transfer (START) domain containing 3  | 0 | 0 | 0 | 0 | 2 | 0 | 2 | 0 | hsa-miR-663  | -0.37 | N/A | Sites in UTR |
| DHTKD1   | NM_018706    | dehydrogenase E1 and transketolase domain containing 1   | 0 | 0 | 0 | 0 | 1 | 0 | 1 | 0 | hsa-miR-1908 | -0.37 | N/A | Sites in UTR |
| MAP2K7   | NM_145185    | mitogen-activated protein kinase kinase 7                | 0 | 0 | 0 | 0 | 2 | 0 | 2 | 0 | hsa-miR-663  | -0.37 | N/A | Sites in UTR |
| TBR1     | NM_006593    | T-box, brain, 1                                          | 0 | 0 | 0 | 0 | 2 | 0 | 1 | 1 | hsa-miR-663  | -0.37 | N/A | Sites in UTR |
| NLRP8    | NM_176811    | NLR family, pyrin domain containing 8                    | 0 | 0 | 0 | 0 | 1 | 0 | 1 | 0 | hsa-miR-1908 | -0.37 | N/A | Sites in UTR |
| RAX      | NM_013435    | retina and anterior neural fold homeobox                 | 0 | 0 | 0 | 0 | 2 | 0 | 0 | 2 | hsa-miR-1908 | -0.37 | N/A | Sites in UTR |
| CASZ1    | NM_001079843 | castor zinc finger 1                                     | 1 | 0 | 1 | 0 | 1 | 0 | 0 | 1 | hsa-miR-663  | -0.37 | N/A | Sites in UTR |
| CEBPA    | NM_004364    | CCAAT/enhancer binding protein (C/EBP), alpha            | 0 | 0 | 0 | 0 | 2 | 0 | 0 | 2 | hsa-miR-663  | -0.37 | N/A | Sites in UTR |
| DOT1L    | NM_032482    | DOT1-like, histone H3 methyltransferase (S. cerevisiae)  | 0 | 0 | 0 | 0 | 2 | 0 | 1 | 1 | hsa-miR-663  | -0.37 | N/A | Sites in UTR |
| CYP8B1   | NM_004391    | cytochrome P450, family 8, subfamily B, polypeptide 1    | 0 | 0 | 0 | 0 | 1 | 0 | 1 | 0 | hsa-miR-1908 | -0.36 | N/A | Sites in UTR |
| SARS     | NM_006513    | seryl-tRNA synthetase                                    | 0 | 0 | 0 | 0 | 1 | 0 | 1 | 0 | hsa-miR-663  | -0.36 | N/A | Sites in UTR |
| ANKRD23  | NM_144994    | ankyrin repeat domain 23                                 | 0 | 0 | 0 | 0 | 3 | 0 | 3 | 0 | hsa-miR-1908 | -0.36 | N/A | Sites in UTR |
| WDR7     | NM_015285    | WD repeat domain 7                                       | 0 | 0 | 0 | 0 | 1 | 1 | 0 | 0 | hsa-miR-1908 | -0.36 | N/A | Sites in UTR |
| TLX3     | NM_021025    | T-cell leukemia homeobox 3                               | 0 | 0 | 0 | 0 | 2 | 0 | 2 | 0 | hsa-miR-1908 | -0.36 | N/A | Sites in UTR |



|         |              |                                                             |   |   |   |   |   |   |   |   |              |       |     |              |
|---------|--------------|-------------------------------------------------------------|---|---|---|---|---|---|---|---|--------------|-------|-----|--------------|
| PIK3R5  | NM_001142633 | phosphoinositide-3-kinase, regulatory subunit 5             | 0 | 0 | 0 | 0 | 1 | 0 | 1 | 0 | hsa-miR-663  | -0.36 | N/A | Sites in UTR |
| GPR123  | NM_001083909 | G protein-coupled receptor 123                              | 0 | 0 | 0 | 0 | 1 | 0 | 1 | 0 | hsa-miR-663  | -0.36 | N/A | Sites in UTR |
| RBPMS2  | NM_194272    | RNA binding protein with multiple splicing 2                | 0 | 0 | 0 | 0 | 2 | 0 | 2 | 0 | hsa-miR-1908 | -0.36 | N/A | Sites in UTR |
| WNK3    | NM_001002838 | WNK lysine deficient protein kinase 3                       | 0 | 0 | 0 | 0 | 1 | 0 | 1 | 0 | hsa-miR-663  | -0.36 | N/A | Sites in UTR |
| RASD1   | NM_001199989 | RAS, dexamethasone-induced 1                                | 0 | 0 | 0 | 0 | 2 | 0 | 1 | 1 | hsa-miR-663  | -0.36 | N/A | Sites in UTR |
| PLA2G6  | NM_001004426 | phospholipase A2, group VI (cytosolic, calcium-independent) | 0 | 0 | 0 | 0 | 1 | 0 | 1 | 0 | hsa-miR-663  | -0.36 | N/A | Sites in UTR |
| AKAP3   | NM_006422    | A kinase (PRKA) anchor protein 3                            | 0 | 0 | 0 | 0 | 1 | 0 | 1 | 0 | hsa-miR-663  | -0.36 | N/A | Sites in UTR |
| ASH1L   | NM_018489    | ash1 (absent, small, or homeotic)-like (Drosophila)         | 1 | 1 | 0 | 0 | 0 | 0 | 0 | 0 | hsa-miR-1908 | -0.36 | N/A | Sites in UTR |
| DPYSL5  | NM_020134    | dihydropyrimidinase-like 5                                  | 0 | 0 | 0 | 0 | 2 | 0 | 2 | 0 | hsa-miR-1908 | -0.35 | N/A | Sites in UTR |
| STK35   | NM_080836    | serine/threonine kinase 35                                  | 0 | 0 | 0 | 0 | 3 | 1 | 1 | 1 | hsa-miR-1908 | -0.35 | N/A | Sites in UTR |
| DAND5   | NM_152654    | DAN domain family, member 5                                 | 0 | 0 | 0 | 0 | 2 | 0 | 0 | 2 | hsa-miR-663  | -0.35 | N/A | Sites in UTR |
| CPLX1   | NM_006651    | complexin 1                                                 | 0 | 0 | 0 | 0 | 2 | 0 | 2 | 0 | hsa-miR-663  | -0.35 | N/A | Sites in UTR |
| PDGFRA  | NM_006206    | platelet-derived growth factor receptor, alpha polypeptide  | 0 | 0 | 0 | 0 | 1 | 1 | 0 | 0 | hsa-miR-663  | -0.35 | N/A | Sites in UTR |
| GAL3ST3 | NM_033036    | galactose-3-O-sulfotransferase 3                            | 0 | 0 | 0 | 0 | 1 | 1 | 0 | 0 | hsa-miR-1908 | -0.35 | N/A | Sites in UTR |
| SPRN    | NM_001012508 | shadow of prion protein homolog (zebrafish)                 | 0 | 0 | 0 | 0 | 3 | 0 | 1 | 2 | hsa-miR-663  | -0.35 | N/A | Sites in UTR |
| SLC39A3 | NM_213568    | solute carrier family 39 (zinc transporter), member 3       | 0 | 0 | 0 | 0 | 1 | 1 | 0 | 0 | hsa-miR-1908 | -0.35 | N/A | Sites in UTR |
| METTL16 | NM_024086    | methyltransferase like 16                                   | 0 | 0 | 0 | 0 | 2 | 0 | 2 | 0 | hsa-miR-663  | -0.35 | N/A | Sites in UTR |
| PORCN   | NM_022825    | porcupine homolog (Drosophila)                              | 0 | 0 | 0 | 0 | 1 | 0 | 1 | 0 | hsa-miR-1908 | -0.35 | N/A | Sites in UTR |
| POU3F1  | NM_002699    | POU class 3 homeobox 1                                      | 1 | 0 | 1 | 0 | 1 | 0 | 1 | 0 | hsa-miR-663  | -0.35 | N/A | Sites in UTR |
| SHISA9  | NM_001145204 | shisa homolog 9 (Xenopus laevis)                            | 0 | 0 | 0 | 0 | 1 | 0 | 1 | 0 | hsa-miR-1908 | -0.34 | N/A | Sites in UTR |

|           |              |                                                                                                |   |   |   |   |   |   |   |   |              |       |     |              |
|-----------|--------------|------------------------------------------------------------------------------------------------|---|---|---|---|---|---|---|---|--------------|-------|-----|--------------|
| CSNK1G2   | NM_001319    | casein kinase 1, gamma 2                                                                       | 0 | 0 | 0 | 0 | 1 | 1 | 0 | 0 | hsa-miR-1908 | -0.34 | N/A | Sites in UTR |
| ATP9A     | NM_006045    | ATPase, class II, type 9A                                                                      | 0 | 0 | 0 | 0 | 1 | 1 | 0 | 0 | hsa-miR-663  | -0.34 | N/A | Sites in UTR |
| POFUT2    | NM_015227    | protein O-fucosyltransferase 2                                                                 | 0 | 0 | 0 | 0 | 3 | 0 | 2 | 1 | hsa-miR-663  | -0.34 | N/A | Sites in UTR |
| CYP2B6    | NM_000767    | cytochrome P450, family 2, subfamily B, polypeptide 6                                          | 0 | 0 | 0 | 0 | 1 | 0 | 1 | 0 | hsa-miR-1908 | -0.34 | N/A | Sites in UTR |
| C20orf27  | NM_001039140 | chromosome 20 open reading frame 27                                                            | 0 | 0 | 0 | 0 | 2 | 0 | 2 | 0 | hsa-miR-663  | -0.34 | N/A | Sites in UTR |
| RAB36     | NM_004914    | RAB36, member RAS oncogene family                                                              | 0 | 0 | 0 | 0 | 1 | 1 | 0 | 0 | hsa-miR-1908 | -0.34 | N/A | Sites in UTR |
| NXF1      | NM_001081491 | nuclear RNA export factor 1                                                                    | 0 | 0 | 0 | 0 | 1 | 1 | 0 | 0 | hsa-miR-1908 | -0.34 | N/A | Sites in UTR |
| AMPD2     | NM_004037    | adenosine monophosphate deaminase 2                                                            | 0 | 0 | 0 | 0 | 1 | 0 | 1 | 0 | hsa-miR-663  | -0.34 | N/A | Sites in UTR |
| CALR      | NM_004343    | calreticulin                                                                                   | 0 | 0 | 0 | 0 | 1 | 0 | 1 | 0 | hsa-miR-663  | -0.34 | N/A | Sites in UTR |
| ETV6      | NM_001987    | ets variant 6                                                                                  | 0 | 0 | 0 | 0 | 1 | 0 | 1 | 0 | hsa-miR-1908 | -0.34 | N/A | Sites in UTR |
| FAM81A    | NM_152450    | family with sequence similarity 81, member A                                                   | 0 | 0 | 0 | 0 | 1 | 0 | 1 | 0 | hsa-miR-1908 | -0.34 | N/A | Sites in UTR |
| MLLT6     | NM_005937    | myeloid/lymphoid or mixed-lineage leukemia (trithorax homolog, Drosophila); translocated to, 6 | 0 | 0 | 0 | 0 | 2 | 0 | 2 | 0 | hsa-miR-1908 | -0.34 | N/A | Sites in UTR |
| LIN28A    | NM_024674    | lin-28 homolog A (C. elegans)                                                                  | 0 | 0 | 0 | 0 | 2 | 0 | 1 | 1 | hsa-miR-1908 | -0.34 | N/A | Sites in UTR |
| TNN       | NM_022093    | tenascin N                                                                                     | 0 | 0 | 0 | 0 | 1 | 0 | 1 | 0 | hsa-miR-663  | -0.34 | N/A | Sites in UTR |
| ELF4      | NM_001127197 | E74-like factor 4 (ets domain transcription factor)                                            | 0 | 0 | 0 | 0 | 1 | 1 | 0 | 0 | hsa-miR-663  | -0.34 | N/A | Sites in UTR |
| C19orf29  | NM_001080543 | chromosome 19 open reading frame 29                                                            | 0 | 0 | 0 | 0 | 1 | 0 | 1 | 0 | hsa-miR-663  | -0.34 | N/A | Sites in UTR |
| MYH14     | NM_001077186 | myosin, heavy chain 14, non-muscle                                                             | 0 | 0 | 0 | 0 | 1 | 0 | 1 | 0 | hsa-miR-663  | -0.34 | N/A | Sites in UTR |
| C20orf144 | NM_080825    | chromosome 20 open reading frame 144                                                           | 0 | 0 | 0 | 0 | 1 | 0 | 1 | 0 | hsa-miR-663  | -0.34 | N/A | Sites in UTR |
| PHF15     | NM_015288    | PHD finger protein 15                                                                          | 0 | 0 | 0 | 0 | 2 | 0 | 2 | 0 | hsa-miR-1908 | -0.34 | N/A | Sites in UTR |
| EPHB2     | NM_004442    | EPH receptor B2                                                                                | 0 | 0 | 0 | 0 | 2 | 0 | 1 | 1 | hsa-miR-1908 | -0.34 | N/A | Sites in UTR |

|             |              |                                                                     |   |   |   |   |   |   |   |   |              |       |     |              |
|-------------|--------------|---------------------------------------------------------------------|---|---|---|---|---|---|---|---|--------------|-------|-----|--------------|
| ADAM8       | NM_001109    | ADAM metallopeptidase domain 8                                      | 0 | 0 | 0 | 0 | 1 | 0 | 1 | 0 | hsa-miR-1908 | -0.33 | N/A | Sites in UTR |
| DLGAP2      | NM_004745    | discs, large (Drosophila) homolog-associated protein 2              | 0 | 0 | 0 | 0 | 2 | 0 | 1 | 1 | hsa-miR-1908 | -0.33 | N/A | Sites in UTR |
| CACNA2D2    | NM_001005505 | calcium channel, voltage-dependent, alpha 2/delta subunit 2         | 0 | 0 | 0 | 0 | 1 | 0 | 1 | 0 | hsa-miR-663  | -0.33 | N/A | Sites in UTR |
| USP20       | NM_001008563 | ubiquitin specific peptidase 20                                     | 0 | 0 | 0 | 0 | 1 | 0 | 1 | 0 | hsa-miR-663  | -0.33 | N/A | Sites in UTR |
| IKZF1       | NM_001220765 | IKAROS family zinc finger 1 (Ikaros)                                | 0 | 0 | 0 | 0 | 2 | 0 | 1 | 1 | hsa-miR-1908 | -0.33 | N/A | Sites in UTR |
| UBR4        | NM_020765    | ubiquitin protein ligase E3 component n-recogin 4                   | 0 | 0 | 0 | 0 | 1 | 0 | 1 | 0 | hsa-miR-1908 | -0.33 | N/A | Sites in UTR |
| SSTR1       | NM_001049    | somatostatin receptor 1                                             | 0 | 0 | 0 | 0 | 2 | 0 | 0 | 2 | hsa-miR-663  | -0.33 | N/A | Sites in UTR |
| MRPL4       | NM_146388    | mitochondrial ribosomal protein L4                                  | 0 | 0 | 0 | 0 | 2 | 0 | 2 | 0 | hsa-miR-663  | -0.33 | N/A | Sites in UTR |
| NPW         | NM_001099456 | neuropeptide W                                                      | 0 | 0 | 0 | 0 | 2 | 0 | 2 | 0 | hsa-miR-663  | -0.33 | N/A | Sites in UTR |
| PEX26       | NM_001127649 | peroxisomal biogenesis factor 26                                    | 0 | 0 | 0 | 0 | 1 | 1 | 0 | 0 | hsa-miR-663  | -0.33 | N/A | Sites in UTR |
| SYNGAP1     | NM_006772    | synaptic Ras GTPase activating protein 1                            | 0 | 0 | 0 | 0 | 2 | 0 | 1 | 1 | hsa-miR-663  | -0.33 | N/A | Sites in UTR |
| WWP2        | NM_007014    | WW domain containing E3 ubiquitin protein ligase 2                  | 0 | 0 | 0 | 0 | 2 | 0 | 0 | 2 | hsa-miR-1908 | -0.33 | N/A | Sites in UTR |
| RUSC1-AS1   | NM_001039517 | RUSC1 antisense RNA 1 (non-protein coding)                          | 0 | 0 | 0 | 0 | 1 | 0 | 1 | 0 | hsa-miR-1908 | -0.33 | N/A | Sites in UTR |
| PAM16       | NM_016069    | presequence translocase-associated motor 16 homolog (S. cerevisiae) | 0 | 0 | 0 | 0 | 2 | 0 | 2 | 0 | hsa-miR-663  | -0.33 | N/A | Sites in UTR |
| CORO7-PAM16 | NM_001201479 | CORO7-PAM16 readthrough                                             | 0 | 0 | 0 | 0 | 2 | 0 | 2 | 0 | hsa-miR-663  | -0.33 | N/A | Sites in UTR |
| NAT8L       | NM_178557    | N-acetyltransferase 8-like (GCN5-related, putative)                 | 0 | 0 | 0 | 0 | 3 | 0 | 3 | 0 | hsa-miR-1908 | -0.33 | N/A | Sites in UTR |
| ST6GAL1     | NM_003032    | ST6 beta-galactosamide alpha-2,6-sialyltransferase 1                | 0 | 0 | 0 | 0 | 1 | 0 | 1 | 0 | hsa-miR-1908 | -0.33 | N/A | Sites in UTR |
| NAAA        | NM_001042402 | N-acyl ethanolamine acid amidase                                    | 0 | 0 | 0 | 0 | 1 | 0 | 1 | 0 | hsa-miR-1908 | -0.33 | N/A | Sites in UTR |
| CCDC142     | NM_032779    | coiled-coil domain containing 142                                   | 0 | 0 | 0 | 0 | 1 | 0 | 1 | 0 | hsa-miR-663  | -0.33 | N/A | Sites in UTR |
| CST9        | NM_001008693 | cystatin 9 (testatin)                                               | 0 | 0 | 0 | 0 | 1 | 0 | 1 | 0 | hsa-miR-663  | -0.33 | N/A | Sites in UTR |

|          |              |                                                                 |   |   |   |   |   |   |   |   |              |       |     |              |
|----------|--------------|-----------------------------------------------------------------|---|---|---|---|---|---|---|---|--------------|-------|-----|--------------|
| LAMB3    | NM_000228    | laminin, beta 3                                                 | 0 | 0 | 0 | 0 | 1 | 0 | 1 | 0 | hsa-miR-663  | -0.32 | N/A | Sites in UTR |
| PPID     | NM_005038    | peptidylprolyl isomerase D                                      | 0 | 0 | 0 | 0 | 1 | 0 | 1 | 0 | hsa-miR-1908 | -0.32 | N/A | Sites in UTR |
| NEUROD2  | NM_006160    | neurogenic differentiation 2                                    | 1 | 0 | 1 | 0 | 2 | 0 | 2 | 0 | hsa-miR-663  | -0.32 | N/A | Sites in UTR |
| PITPNB   | NM_012399    | phosphatidylinositol transfer protein, beta                     | 0 | 0 | 0 | 0 | 1 | 1 | 0 | 0 | hsa-miR-663  | -0.32 | N/A | Sites in UTR |
| HEYL     | NM_014571    | hairy/enhancer-of-split related with YRPW motif-like            | 0 | 0 | 0 | 0 | 1 | 0 | 1 | 0 | hsa-miR-663  | -0.32 | N/A | Sites in UTR |
| ADAMTS15 | NM_139055    | ADAM metallopeptidase with thrombospondin type 1 motif, 15      | 0 | 0 | 0 | 0 | 1 | 0 | 1 | 0 | hsa-miR-663  | -0.32 | N/A | Sites in UTR |
| MAD2L2   | NM_001127325 | MAD2 mitotic arrest deficient-like 2 (yeast)                    | 0 | 0 | 0 | 0 | 1 | 0 | 1 | 0 | hsa-miR-1908 | -0.32 | N/A | Sites in UTR |
| LRRC8A   | NM_001127244 | leucine rich repeat containing 8 family, member A               | 0 | 0 | 0 | 0 | 1 | 0 | 1 | 0 | hsa-miR-1908 | -0.32 | N/A | Sites in UTR |
| C7orf29  | NM_138434    | chromosome 7 open reading frame 29                              | 0 | 0 | 0 | 0 | 1 | 0 | 1 | 0 | hsa-miR-663  | -0.32 | N/A | Sites in UTR |
| PPIL2    | NM_014337    | peptidylprolyl isomerase (cyclophilin)-like 2                   | 0 | 0 | 0 | 0 | 2 | 0 | 1 | 1 | hsa-miR-663  | -0.32 | N/A | Sites in UTR |
| FOXI2    | NM_207426    | forkhead box I2                                                 | 0 | 0 | 0 | 0 | 1 | 1 | 0 | 0 | hsa-miR-663  | -0.32 | N/A | Sites in UTR |
| SIGLEC7  | NM_014385    | sialic acid binding Ig-like lectin 7                            | 0 | 0 | 0 | 0 | 1 | 0 | 1 | 0 | hsa-miR-1908 | -0.32 | N/A | Sites in UTR |
| SPSB3    | NM_080861    | splA/ryanodine receptor domain and SOCS box containing 3        | 0 | 0 | 0 | 0 | 1 | 0 | 1 | 0 | hsa-miR-663  | -0.32 | N/A | Sites in UTR |
| SH2D1B   | NM_053282    | SH2 domain containing 1B                                        | 0 | 0 | 0 | 0 | 1 | 0 | 1 | 0 | hsa-miR-1908 | -0.32 | N/A | Sites in UTR |
| C6orf141 | NM_001145652 | chromosome 6 open reading frame 141                             | 0 | 0 | 0 | 0 | 1 | 0 | 1 | 0 | hsa-miR-1908 | -0.32 | N/A | Sites in UTR |
| GYS1     | NM_001161587 | glycogen synthase 1 (muscle)                                    | 0 | 0 | 0 | 0 | 1 | 0 | 1 | 0 | hsa-miR-663  | -0.32 | N/A | Sites in UTR |
| GDAP1L1  | NM_024034    | ganglioside-induced differentiation-associated protein 1-like 1 | 0 | 0 | 0 | 0 | 1 | 0 | 1 | 0 | hsa-miR-1908 | -0.32 | N/A | Sites in UTR |
| SRRM4    | NM_194286    | serine/arginine repetitive matrix 4                             | 0 | 0 | 0 | 0 | 1 | 0 | 1 | 0 | hsa-miR-1908 | -0.32 | N/A | Sites in UTR |
| AQP10    | NM_080429    | aquaporin 10                                                    | 0 | 0 | 0 | 0 | 1 | 0 | 1 | 0 | hsa-miR-663  | -0.32 | N/A | Sites in UTR |
| RHBDD1   | NM_001167608 | rhomboid domain containing 1                                    | 0 | 0 | 0 | 0 | 1 | 1 | 0 | 0 | hsa-miR-663  | -0.32 | N/A | Sites in UTR |

|           |              |                                                                        |   |   |   |   |   |   |   |   |              |       |     |              |
|-----------|--------------|------------------------------------------------------------------------|---|---|---|---|---|---|---|---|--------------|-------|-----|--------------|
| KIF21B    | NM_017596    | kinesin family member 21B                                              | 0 | 0 | 0 | 0 | 3 | 1 | 2 | 0 | hsa-miR-663  | -0.32 | N/A | Sites in UTR |
| SOBP      | NM_018013    | sine oculis binding protein homolog (Drosophila)                       | 0 | 0 | 0 | 0 | 2 | 0 | 2 | 0 | hsa-miR-663  | -0.32 | N/A | Sites in UTR |
| SEC22C    | NM_032970    | SEC22 vesicle trafficking protein homolog C (S. cerevisiae)            | 0 | 0 | 0 | 0 | 1 | 1 | 0 | 0 | hsa-miR-1908 | -0.32 | N/A | Sites in UTR |
| PLOD3     | NM_001084    | procollagen-lysine, 2-oxoglutarate 5-dioxygenase 3                     | 0 | 0 | 0 | 0 | 1 | 0 | 1 | 0 | hsa-miR-663  | -0.32 | N/A | Sites in UTR |
| ADCYAP1R1 | NM_001118    | adenylate cyclase activating polypeptide 1 (pituitary) receptor type I | 0 | 0 | 0 | 0 | 1 | 1 | 0 | 0 | hsa-miR-1908 | -0.32 | N/A | Sites in UTR |
| EEPD1     | NM_030636    | endonuclease/exonuclease/phosphatase family domain containing 1        | 0 | 0 | 0 | 0 | 2 | 0 | 2 | 0 | hsa-miR-663  | -0.32 | N/A | Sites in UTR |
| DENND5A   | NM_015213    | DENN/MADD domain containing 5A                                         | 0 | 0 | 0 | 0 | 1 | 0 | 0 | 1 | hsa-miR-1908 | -0.31 | N/A | Sites in UTR |
| ASB16     | NM_080863    | ankyrin repeat and SOCS box containing 16                              | 0 | 0 | 0 | 0 | 1 | 0 | 1 | 0 | hsa-miR-663  | -0.31 | N/A | Sites in UTR |
| CYTH2     | NM_004228    | cytohesin 2                                                            | 1 | 0 | 1 | 0 | 1 | 0 | 0 | 1 | hsa-miR-663  | -0.31 | N/A | Sites in UTR |
| CNBP      | NM_001127192 | CCHC-type zinc finger, nucleic acid binding protein                    | 0 | 0 | 0 | 0 | 3 | 0 | 1 | 2 | hsa-miR-1908 | -0.31 | N/A | Sites in UTR |
| GPSM3     | NM_022107    | G-protein signaling modulator 3                                        | 0 | 0 | 0 | 0 | 1 | 0 | 1 | 0 | hsa-miR-1908 | -0.31 | N/A | Sites in UTR |
| CAMKMT    | NM_024766    | calmodulin-lysine N-methyltransferase                                  | 0 | 0 | 0 | 0 | 1 | 0 | 1 | 0 | hsa-miR-1908 | -0.31 | N/A | Sites in UTR |
| ZNF490    | NM_020714    | zinc finger protein 490                                                | 0 | 0 | 0 | 0 | 2 | 0 | 1 | 1 | hsa-miR-1908 | -0.31 | N/A | Sites in UTR |
| ABLIM3    | NM_014945    | actin binding LIM protein family, member 3                             | 0 | 0 | 0 | 0 | 1 | 1 | 0 | 0 | hsa-miR-1908 | -0.31 | N/A | Sites in UTR |
| NACC2     | NM_144653    | NACC family member 2, BEN and BTB (POZ) domain containing              | 0 | 0 | 0 | 0 | 2 | 0 | 2 | 0 | hsa-miR-663  | -0.31 | N/A | Sites in UTR |
| RBCK1     | NM_006462    | RanBP-type and C3HC4-type zinc finger containing 1                     | 0 | 0 | 0 | 0 | 1 | 0 | 1 | 0 | hsa-miR-1908 | -0.31 | N/A | Sites in UTR |
| MAPKBP1   | NM_001128608 | mitogen-activated protein kinase binding protein 1                     | 0 | 0 | 0 | 0 | 1 | 0 | 1 | 0 | hsa-miR-1908 | -0.31 | N/A | Sites in UTR |
| FOXN4     | NM_213596    | forkhead box N4                                                        | 0 | 0 | 0 | 0 | 1 | 0 | 1 | 0 | hsa-miR-1908 | -0.31 | N/A | Sites in UTR |
| VPS37D    | NM_001077621 | vacuolar protein sorting 37 homolog D (S. cerevisiae)                  | 1 | 0 | 1 | 0 | 0 | 0 | 0 | 0 | hsa-miR-663  | -0.31 | N/A | Sites in UTR |
| RS1       | NM_000330    | retinoschisin 1                                                        | 0 | 0 | 0 | 0 | 1 | 0 | 1 | 0 | hsa-miR-1908 | -0.31 | N/A | Sites in UTR |

|          |              |                                                           |   |   |   |   |   |   |   |   |              |       |     |              |
|----------|--------------|-----------------------------------------------------------|---|---|---|---|---|---|---|---|--------------|-------|-----|--------------|
| PCIF1    | NM_022104    | PDX1 C-terminal inhibiting factor 1                       | 0 | 0 | 0 | 0 | 1 | 0 | 1 | 0 | hsa-miR-1908 | -0.31 | N/A | Sites in UTR |
| KCTD2    | NM_015353    | potassium channel tetramerisation domain containing 2     | 0 | 0 | 0 | 0 | 1 | 1 | 0 | 0 | hsa-miR-1908 | -0.31 | N/A | Sites in UTR |
| KALRN    | NM_003947    | kalirin, RhoGEF kinase                                    | 0 | 0 | 0 | 0 | 1 | 0 | 1 | 0 | hsa-miR-1908 | -0.31 | N/A | Sites in UTR |
| SNRNP200 | NM_014014    | small nuclear ribonucleoprotein 200kDa (U5)               | 0 | 0 | 0 | 0 | 1 | 0 | 1 | 0 | hsa-miR-663  | -0.31 | N/A | Sites in UTR |
| OTUB1    | NM_017670    | OTU domain, ubiquitin aldehyde binding 1                  | 0 | 0 | 0 | 0 | 1 | 0 | 1 | 0 | hsa-miR-1908 | -0.31 | N/A | Sites in UTR |
| FIZ1     | NM_032836    | FLT3-interacting zinc finger 1                            | 0 | 0 | 0 | 0 | 1 | 0 | 1 | 0 | hsa-miR-1908 | -0.31 | N/A | Sites in UTR |
| GLI3     | NM_000168    | GLI family zinc finger 3                                  | 0 | 0 | 0 | 0 | 1 | 0 | 1 | 0 | hsa-miR-1908 | -0.31 | N/A | Sites in UTR |
| KIAA0556 | NM_015202    | KIAA0556                                                  | 0 | 0 | 0 | 0 | 2 | 0 | 0 | 2 | hsa-miR-1908 | -0.31 | N/A | Sites in UTR |
| MMP15    | NM_002428    | matrix metalloproteinase 15 (membrane-inserted)           | 0 | 0 | 0 | 0 | 1 | 0 | 1 | 0 | hsa-miR-663  | -0.31 | N/A | Sites in UTR |
| TSPAN31  | NM_005981    | tetraspanin 31                                            | 0 | 0 | 0 | 0 | 1 | 0 | 1 | 0 | hsa-miR-663  | -0.31 | N/A | Sites in UTR |
| CELF5    | NM_001172673 | CUGBP, Elav-like family member 5                          | 0 | 0 | 0 | 0 | 2 | 0 | 1 | 1 | hsa-miR-663  | -0.31 | N/A | Sites in UTR |
| TBC1D30  | NM_015279    | TBC1 domain family, member 30                             | 0 | 0 | 0 | 0 | 1 | 0 | 1 | 0 | hsa-miR-663  | -0.3  | N/A | Sites in UTR |
| DUSP14   | NM_007026    | dual specificity phosphatase 14                           | 0 | 0 | 0 | 0 | 1 | 0 | 1 | 0 | hsa-miR-1908 | -0.3  | N/A | Sites in UTR |
| PACSIN2  | NM_001184970 | protein kinase C and casein kinase substrate in neurons 2 | 0 | 0 | 0 | 0 | 1 | 0 | 1 | 0 | hsa-miR-663  | -0.3  | N/A | Sites in UTR |
| ZNF219   | NM_001101672 | zinc finger protein 219                                   | 0 | 0 | 0 | 0 | 1 | 0 | 1 | 0 | hsa-miR-663  | -0.3  | N/A | Sites in UTR |
| GAS7     | NM_001130831 | growth arrest-specific 7                                  | 0 | 0 | 0 | 0 | 2 | 0 | 0 | 2 | hsa-miR-663  | -0.3  | N/A | Sites in UTR |
| ZBTB7A   | NM_015898    | zinc finger and BTB domain containing 7A                  | 0 | 0 | 0 | 0 | 2 | 0 | 2 | 0 | hsa-miR-663  | -0.3  | N/A | Sites in UTR |
| CDC42EP1 | NM_152243    | CDC42 effector protein (Rho GTPase binding) 1             | 0 | 0 | 0 | 0 | 1 | 0 | 1 | 0 | hsa-miR-663  | -0.3  | N/A | Sites in UTR |
| SEZ6     | NM_001098635 | seizure related 6 homolog (mouse)                         | 0 | 0 | 0 | 0 | 1 | 0 | 1 | 0 | hsa-miR-1908 | -0.3  | N/A | Sites in UTR |
| RASL12   | NM_016563    | RAS-like, family 12                                       | 0 | 0 | 0 | 0 | 1 | 0 | 1 | 0 | hsa-miR-663  | -0.3  | N/A | Sites in UTR |

|          |              |                                                                  |   |   |   |   |   |   |   |   |              |      |     |              |
|----------|--------------|------------------------------------------------------------------|---|---|---|---|---|---|---|---|--------------|------|-----|--------------|
| PGPEP1   | NM_017712    | pyroglutamyl-peptidase I                                         | 0 | 0 | 0 | 0 | 1 | 0 | 1 | 0 | hsa-miR-663  | -0.3 | N/A | Sites in UTR |
| MIB2     | NM_001170686 | mindbomb homolog 2 (Drosophila)                                  | 0 | 0 | 0 | 0 | 1 | 0 | 1 | 0 | hsa-miR-1908 | -0.3 | N/A | Sites in UTR |
| SETD8    | NM_020382    | SET domain containing (lysine methyltransferase) 8               | 0 | 0 | 0 | 0 | 1 | 0 | 1 | 0 | hsa-miR-663  | -0.3 | N/A | Sites in UTR |
| EXTL3    | NM_001440    | exostosins (multiple)-like 3                                     | 0 | 0 | 0 | 0 | 2 | 0 | 2 | 0 | hsa-miR-1908 | -0.3 | N/A | Sites in UTR |
| ELN      | NM_000501    | elastin                                                          | 0 | 0 | 0 | 0 | 1 | 0 | 1 | 0 | hsa-miR-663  | -0.3 | N/A | Sites in UTR |
| C9orf66  | NM_152569    | chromosome 9 open reading frame 66                               | 0 | 0 | 0 | 0 | 1 | 0 | 1 | 0 | hsa-miR-663  | -0.3 | N/A | Sites in UTR |
| ING5     | NM_032329    | inhibitor of growth family, member 5                             | 0 | 0 | 0 | 0 | 3 | 0 | 2 | 1 | hsa-miR-663  | -0.3 | N/A | Sites in UTR |
| SPPL2B   | NM_001077238 | signal peptide peptidase-like 2B                                 | 0 | 0 | 0 | 0 | 2 | 0 | 0 | 2 | hsa-miR-663  | -0.3 | N/A | Sites in UTR |
| HOXC10   | NM_017409    | homeobox C10                                                     | 1 | 0 | 1 | 0 | 0 | 0 | 0 | 0 | hsa-miR-663  | -0.3 | N/A | Sites in UTR |
| TRIM58   | NM_015431    | tripartite motif containing 58                                   | 0 | 0 | 0 | 0 | 1 | 0 | 1 | 0 | hsa-miR-1908 | -0.3 | N/A | Sites in UTR |
| ZFP3     | NM_153018    | zinc finger protein 3 homolog (mouse)                            | 0 | 0 | 0 | 0 | 1 | 0 | 1 | 0 | hsa-miR-1908 | -0.3 | N/A | Sites in UTR |
| C6orf145 | NM_183373    | chromosome 6 open reading frame 145                              | 0 | 0 | 0 | 0 | 1 | 0 | 1 | 0 | hsa-miR-1908 | -0.3 | N/A | Sites in UTR |
| ZFAND3   | NM_021943    | zinc finger, AN1-type domain 3                                   | 0 | 0 | 0 | 0 | 2 | 0 | 2 | 0 | hsa-miR-663  | -0.3 | N/A | Sites in UTR |
| CAMK2N2  | NM_033259    | calcium/calmodulin-dependent protein kinase II inhibitor 2       | 0 | 0 | 0 | 0 | 2 | 0 | 2 | 0 | hsa-miR-663  | -0.3 | N/A | Sites in UTR |
| GHDC     | NM_001142622 | GH3 domain containing                                            | 0 | 0 | 0 | 0 | 1 | 0 | 1 | 0 | hsa-miR-663  | -0.3 | N/A | Sites in UTR |
| CD8A     | NM_001145873 | CD8a molecule                                                    | 0 | 0 | 0 | 0 | 1 | 0 | 1 | 0 | hsa-miR-1908 | -0.3 | N/A | Sites in UTR |
| SLC39A8  | NM_001135147 | solute carrier family 39 (zinc transporter), member 8            | 0 | 0 | 0 | 0 | 1 | 0 | 1 | 0 | hsa-miR-1908 | -0.3 | N/A | Sites in UTR |
| CCDC120  | NM_001163323 | coiled-coil domain containing 120                                | 0 | 0 | 0 | 0 | 1 | 0 | 1 | 0 | hsa-miR-1908 | -0.3 | N/A | Sites in UTR |
| MAFK     | NM_002360    | v-maf musculoaponeurotic fibrosarcoma oncogene homolog K (avian) | 0 | 0 | 0 | 0 | 2 | 0 | 0 | 2 | hsa-miR-1908 | -0.3 | N/A | Sites in UTR |
| CRABP2   | NM_001199723 | cellular retinoic acid binding protein 2                         | 0 | 0 | 0 | 0 | 1 | 0 | 1 | 0 | hsa-miR-663  | -0.3 | N/A | Sites in UTR |

|          |              |                                                                          |   |   |   |   |   |   |   |   |              |       |     |              |
|----------|--------------|--------------------------------------------------------------------------|---|---|---|---|---|---|---|---|--------------|-------|-----|--------------|
| SLC1A7   | NM_006671    | solute carrier family 1 (glutamate transporter), member 7                | 0 | 0 | 0 | 0 | 1 | 0 | 1 | 0 | hsa-miR-1908 | -0.3  | N/A | Sites in UTR |
| FSCN1    | NM_003088    | fascin homolog 1, actin-bundling protein (Strongylocentrotus purpuratus) | 0 | 0 | 0 | 0 | 1 | 0 | 1 | 0 | hsa-miR-663  | -0.3  | N/A | Sites in UTR |
| STAM2    | NM_005843    | signal transducing adaptor molecule (SH3 domain and ITAM motif) 2        | 0 | 0 | 0 | 0 | 1 | 0 | 1 | 0 | hsa-miR-663  | -0.3  | N/A | Sites in UTR |
| HCST     | NM_001007469 | hematopoietic cell signal transducer                                     | 0 | 0 | 0 | 0 | 1 | 0 | 1 | 0 | hsa-miR-663  | -0.3  | N/A | Sites in UTR |
| ZCCHC3   | NM_033089    | zinc finger, CCHC domain containing 3                                    | 0 | 0 | 0 | 0 | 1 | 0 | 1 | 0 | hsa-miR-663  | -0.3  | N/A | Sites in UTR |
| SIM2     | NM_005069    | single-minded homolog 2 (Drosophila)                                     | 0 | 0 | 0 | 0 | 1 | 0 | 1 | 0 | hsa-miR-1908 | -0.29 | N/A | Sites in UTR |
| PGS1     | NM_024419    | phosphatidylglycerophosphate synthase 1                                  | 0 | 0 | 0 | 0 | 1 | 0 | 1 | 0 | hsa-miR-663  | -0.29 | N/A | Sites in UTR |
| OLFM1    | NM_014279    | olfactomedin 1                                                           | 0 | 0 | 0 | 0 | 1 | 0 | 1 | 0 | hsa-miR-663  | -0.29 | N/A | Sites in UTR |
| TUBA8    | NM_001193414 | tubulin, alpha 8                                                         | 0 | 0 | 0 | 0 | 1 | 0 | 1 | 0 | hsa-miR-1908 | -0.29 | N/A | Sites in UTR |
| GPR173   | NM_018969    | G protein-coupled receptor 173                                           | 0 | 0 | 0 | 0 | 1 | 0 | 1 | 0 | hsa-miR-1908 | -0.29 | N/A | Sites in UTR |
| C2CD4C   | NM_001136263 | C2 calcium-dependent domain containing 4C                                | 0 | 0 | 0 | 0 | 1 | 0 | 1 | 0 | hsa-miR-663  | -0.29 | N/A | Sites in UTR |
| DACT2    | NM_214462    | dapper, antagonist of beta-catenin, homolog 2 (Xenopus laevis)           | 0 | 0 | 0 | 0 | 1 | 0 | 1 | 0 | hsa-miR-663  | -0.29 | N/A | Sites in UTR |
| MAP2K2   | NM_030662    | mitogen-activated protein kinase kinase 2                                | 0 | 0 | 0 | 0 | 1 | 0 | 1 | 0 | hsa-miR-663  | -0.29 | N/A | Sites in UTR |
| MIS18A   | NM_018944    | MIS18 kinetochore protein homolog A (S. pombe)                           | 0 | 0 | 0 | 0 | 1 | 0 | 1 | 0 | hsa-miR-1908 | -0.29 | N/A | Sites in UTR |
| FLJ22184 | NM_001190467 | hypothetical protein FLJ22184                                            | 0 | 0 | 0 | 0 | 2 | 0 | 2 | 0 | hsa-miR-663  | -0.29 | N/A | Sites in UTR |
| NPHP4    | NM_015102    | nephronophthisis 4                                                       | 0 | 0 | 0 | 0 | 1 | 0 | 1 | 0 | hsa-miR-663  | -0.29 | N/A | Sites in UTR |
| 9-Sep    | NM_001113491 | septin 9                                                                 | 0 | 0 | 0 | 0 | 2 | 0 | 1 | 1 | hsa-miR-663  | -0.29 | N/A | Sites in UTR |
| HUWE1    | NM_031407    | HECT, UBA and WWE domain containing 1                                    | 0 | 0 | 0 | 0 | 1 | 0 | 1 | 0 | hsa-miR-1908 | -0.29 | N/A | Sites in UTR |
| ENTPD2   | NM_001246    | ectonucleoside triphosphate diphosphohydrolase 2                         | 0 | 0 | 0 | 0 | 1 | 0 | 1 | 0 | hsa-miR-1908 | -0.29 | N/A | Sites in UTR |
| NAV1     | NM_001167738 | neuron navigator 1                                                       | 0 | 0 | 0 | 0 | 1 | 0 | 1 | 0 | hsa-miR-1908 | -0.29 | N/A | Sites in UTR |



|          |              |                                                                            |   |   |   |   |   |   |   |   |              |       |     |              |
|----------|--------------|----------------------------------------------------------------------------|---|---|---|---|---|---|---|---|--------------|-------|-----|--------------|
| SIGLEC12 | NM_033329    | sialic acid binding Ig-like lectin 12 (gene/pseudogene)                    | 0 | 0 | 0 | 0 | 1 | 0 | 1 | 0 | hsa-miR-1908 | -0.29 | N/A | Sites in UTR |
| C2orf85  | NM_173821    | chromosome 2 open reading frame 85                                         | 0 | 0 | 0 | 0 | 1 | 0 | 1 | 0 | hsa-miR-1908 | -0.29 | N/A | Sites in UTR |
| CCBP2    | NM_001296    | chemokine binding protein 2                                                | 0 | 0 | 0 | 0 | 1 | 0 | 1 | 0 | hsa-miR-1908 | -0.29 | N/A | Sites in UTR |
| CLDN9    | NM_020982    | claudin 9                                                                  | 0 | 0 | 0 | 0 | 1 | 0 | 1 | 0 | hsa-miR-663  | -0.29 | N/A | Sites in UTR |
| TACC3    | NM_006342    | transforming, acidic coiled-coil containing protein 3                      | 0 | 0 | 0 | 0 | 1 | 0 | 1 | 0 | hsa-miR-663  | -0.29 | N/A | Sites in UTR |
| GAB2     | NM_012296    | GRB2-associated binding protein 2                                          | 0 | 0 | 0 | 0 | 1 | 1 | 0 | 0 | hsa-miR-663  | -0.29 | N/A | Sites in UTR |
| TBC1D22A | NM_014346    | TBC1 domain family, member 22A                                             | 0 | 0 | 0 | 0 | 1 | 1 | 0 | 0 | hsa-miR-1908 | -0.29 | N/A | Sites in UTR |
| RFNG     | NM_002917    | RFNG O-fucosylpeptide 3-beta-N-acetylglucosaminyltransferase               | 0 | 0 | 0 | 0 | 1 | 0 | 1 | 0 | hsa-miR-663  | -0.29 | N/A | Sites in UTR |
| VAMP2    | NM_014232    | vesicle-associated membrane protein 2 (synaptobrevin 2)                    | 0 | 0 | 0 | 0 | 1 | 0 | 1 | 0 | hsa-miR-663  | -0.29 | N/A | Sites in UTR |
| CEP104   | NM_014704    | centrosomal protein 104kDa                                                 | 0 | 0 | 0 | 0 | 1 | 0 | 1 | 0 | hsa-miR-663  | -0.29 | N/A | Sites in UTR |
| BAIAP2   | NM_001144888 | BAI1-associated protein 2                                                  | 0 | 0 | 0 | 0 | 1 | 0 | 1 | 0 | hsa-miR-663  | -0.29 | N/A | Sites in UTR |
| C17orf81 | NM_015362    | chromosome 17 open reading frame 81                                        | 0 | 0 | 0 | 0 | 1 | 0 | 1 | 0 | hsa-miR-1908 | -0.29 | N/A | Sites in UTR |
| CENPO    | NM_001199803 | centromere protein O                                                       | 0 | 0 | 0 | 0 | 1 | 0 | 1 | 0 | hsa-miR-663  | -0.29 | N/A | Sites in UTR |
| SLC10A7  | NM_001029998 | solute carrier family 10 (sodium/bile acid cotransporter family), member 7 | 0 | 0 | 0 | 0 | 1 | 0 | 1 | 0 | hsa-miR-1908 | -0.29 | N/A | Sites in UTR |
| EIF1AD   | NM_001242481 | eukaryotic translation initiation factor 1A domain containing              | 0 | 0 | 0 | 0 | 1 | 0 | 1 | 0 | hsa-miR-663  | -0.29 | N/A | Sites in UTR |
| ARF1     | NM_001024226 | ADP-ribosylation factor 1                                                  | 0 | 0 | 0 | 0 | 1 | 0 | 1 | 0 | hsa-miR-1908 | -0.29 | N/A | Sites in UTR |
| CHRN2    | NM_000748    | cholinergic receptor, nicotinic, beta 2 (neuronal)                         | 0 | 0 | 0 | 0 | 1 | 0 | 1 | 0 | hsa-miR-1908 | -0.29 | N/A | Sites in UTR |
| RGS5     | NM_001195303 | regulator of G-protein signaling 5                                         | 0 | 0 | 0 | 0 | 1 | 1 | 0 | 0 | hsa-miR-1908 | -0.29 | N/A | Sites in UTR |
| ATP6V0A1 | NM_001130020 | ATPase, H+ transporting, lysosomal V0 subunit a1                           | 0 | 0 | 0 | 0 | 1 | 0 | 1 | 0 | hsa-miR-1908 | -0.29 | N/A | Sites in UTR |
| PBX1     | NM_001204961 | pre-B-cell leukemia homeobox 1                                             | 0 | 0 | 0 | 0 | 1 | 0 | 1 | 0 | hsa-miR-663  | -0.29 | N/A | Sites in UTR |

|          |              |                                                                    |   |   |   |   |   |   |   |   |              |       |     |              |
|----------|--------------|--------------------------------------------------------------------|---|---|---|---|---|---|---|---|--------------|-------|-----|--------------|
| TFE3     | NM_006521    | transcription factor binding to IGHM enhancer 3                    | 0 | 0 | 0 | 0 | 1 | 0 | 1 | 0 | hsa-miR-1908 | -0.29 | N/A | Sites in UTR |
| PHB2     | NM_001144831 | prohibitin 2                                                       | 0 | 0 | 0 | 0 | 1 | 0 | 1 | 0 | hsa-miR-1908 | -0.29 | N/A | Sites in UTR |
| ARHGAP31 | NM_020754    | Rho GTPase activating protein 31                                   | 0 | 0 | 0 | 0 | 1 | 1 | 0 | 0 | hsa-miR-663  | -0.29 | N/A | Sites in UTR |
| PDE4C    | NM_000923    | phosphodiesterase 4C, cAMP-specific                                | 0 | 0 | 0 | 0 | 1 | 0 | 1 | 0 | hsa-miR-1908 | -0.29 | N/A | Sites in UTR |
| FAM90A1  | NM_018088    | family with sequence similarity 90, member A1                      | 0 | 0 | 0 | 0 | 1 | 0 | 1 | 0 | hsa-miR-663  | -0.29 | N/A | Sites in UTR |
| TRIM65   | NM_173547    | tripartite motif containing 65                                     | 0 | 0 | 0 | 0 | 1 | 0 | 1 | 0 | hsa-miR-663  | -0.29 | N/A | Sites in UTR |
| FAM90A7  | NM_001136572 | family with sequence similarity 90, member A7                      | 0 | 0 | 0 | 0 | 1 | 0 | 1 | 0 | hsa-miR-663  | -0.29 | N/A | Sites in UTR |
| SCML4    | NM_198081    | sex comb on midleg-like 4 (Drosophila)                             | 0 | 0 | 0 | 0 | 1 | 0 | 0 | 1 | hsa-miR-1908 | -0.28 | N/A | Sites in UTR |
| FHIT     | NM_001166243 | fragile histidine triad gene                                       | 0 | 0 | 0 | 0 | 1 | 0 | 1 | 0 | hsa-miR-663  | -0.28 | N/A | Sites in UTR |
| GPR124   | NM_032777    | G protein-coupled receptor 124                                     | 0 | 0 | 0 | 0 | 1 | 0 | 1 | 0 | hsa-miR-1908 | -0.28 | N/A | Sites in UTR |
| SRGAP1   | NM_020762    | SLIT-ROBO Rho GTPase activating protein 1                          | 0 | 0 | 0 | 0 | 1 | 0 | 1 | 0 | hsa-miR-663  | -0.28 | N/A | Sites in UTR |
| FAM167B  | NM_032648    | family with sequence similarity 167, member B                      | 0 | 0 | 0 | 0 | 1 | 0 | 1 | 0 | hsa-miR-663  | -0.28 | N/A | Sites in UTR |
| LATS1    | NM_004690    | LATS, large tumor suppressor, homolog 1 (Drosophila)               | 0 | 0 | 0 | 0 | 1 | 0 | 1 | 0 | hsa-miR-663  | -0.28 | N/A | Sites in UTR |
| BET1L    | NM_001098787 | blocked early in transport 1 homolog (S. cerevisiae)-like          | 0 | 0 | 0 | 0 | 1 | 0 | 1 | 0 | hsa-miR-1908 | -0.28 | N/A | Sites in UTR |
| PYDC1    | NM_152901    | PYD (pyrin domain) containing 1                                    | 0 | 0 | 0 | 0 | 1 | 0 | 1 | 0 | hsa-miR-1908 | -0.28 | N/A | Sites in UTR |
| KIAA0240 | NM_015349    | KIAA0240                                                           | 0 | 0 | 0 | 0 | 1 | 0 | 1 | 0 | hsa-miR-663  | -0.28 | N/A | Sites in UTR |
| KRT6C    | NM_173086    | keratin 6C                                                         | 0 | 0 | 0 | 0 | 1 | 0 | 1 | 0 | hsa-miR-1908 | -0.28 | N/A | Sites in UTR |
| RGAG4    | NM_001024455 | retrotransposon gag domain containing 4                            | 0 | 0 | 0 | 0 | 1 | 0 | 1 | 0 | hsa-miR-663  | -0.28 | N/A | Sites in UTR |
| SYNGR1   | NM_004711    | synaptogyrin 1                                                     | 0 | 0 | 0 | 0 | 2 | 0 | 2 | 0 | hsa-miR-663  | -0.28 | N/A | Sites in UTR |
| PTPN18   | NM_001142370 | protein tyrosine phosphatase, non-receptor type 18 (brain-derived) | 0 | 0 | 0 | 0 | 1 | 1 | 0 | 0 | hsa-miR-663  | -0.28 | N/A | Sites in UTR |

|         |              |                                                                                              |   |   |   |   |   |   |   |   |              |       |     |              |
|---------|--------------|----------------------------------------------------------------------------------------------|---|---|---|---|---|---|---|---|--------------|-------|-----|--------------|
| ALAD    | NM_000031    | aminolevulinatase dehydratase                                                                | 0 | 0 | 0 | 0 | 1 | 0 | 1 | 0 | hsa-miR-663  | -0.28 | N/A | Sites in UTR |
| RFX2    | NM_000635    | regulatory factor X, 2 (influences HLA class II expression)                                  | 0 | 0 | 0 | 0 | 1 | 0 | 1 | 0 | hsa-miR-663  | -0.28 | N/A | Sites in UTR |
| DENND4B | NM_014856    | DENN/MADD domain containing 4B                                                               | 0 | 0 | 0 | 0 | 1 | 0 | 1 | 0 | hsa-miR-1908 | -0.28 | N/A | Sites in UTR |
| CDH23   | NM_001171931 | cadherin-related 23                                                                          | 0 | 0 | 0 | 0 | 1 | 0 | 1 | 0 | hsa-miR-663  | -0.28 | N/A | Sites in UTR |
| ZYX     | NM_001010972 | zyxin                                                                                        | 0 | 0 | 0 | 0 | 1 | 0 | 1 | 0 | hsa-miR-1908 | -0.28 | N/A | Sites in UTR |
| SLC7A8  | NM_012244    | solute carrier family 7 (amino acid transporter light chain, L system), member 8             | 0 | 0 | 0 | 0 | 1 | 0 | 1 | 0 | hsa-miR-663  | -0.28 | N/A | Sites in UTR |
| RPP25   | NM_017793    | ribonuclease P/MRP 25kDa subunit                                                             | 0 | 0 | 0 | 0 | 1 | 0 | 1 | 0 | hsa-miR-663  | -0.28 | N/A | Sites in UTR |
| PLEKHA2 | NM_021623    | pleckstrin homology domain containing, family A (phosphoinositide binding specific) member 2 | 0 | 0 | 0 | 0 | 1 | 0 | 1 | 0 | hsa-miR-1908 | -0.28 | N/A | Sites in UTR |
| CD180   | NM_005582    | CD180 molecule                                                                               | 0 | 0 | 0 | 0 | 1 | 0 | 1 | 0 | hsa-miR-663  | -0.28 | N/A | Sites in UTR |
| PET112  | NM_004564    | PET112 homolog (yeast)                                                                       | 0 | 0 | 0 | 0 | 1 | 0 | 1 | 0 | hsa-miR-1908 | -0.28 | N/A | Sites in UTR |
| CNIH2   | NM_182553    | cornichon homolog 2 (Drosophila)                                                             | 0 | 0 | 0 | 0 | 1 | 0 | 1 | 0 | hsa-miR-663  | -0.28 | N/A | Sites in UTR |
| THSD4   | NM_024817    | thrombospondin, type I, domain containing 4                                                  | 0 | 0 | 0 | 0 | 2 | 0 | 2 | 0 | hsa-miR-663  | -0.28 | N/A | Sites in UTR |
| AKAP13  | NM_006738    | A kinase (PRKA) anchor protein 13                                                            | 0 | 0 | 0 | 0 | 2 | 0 | 2 | 0 | hsa-miR-663  | -0.28 | N/A | Sites in UTR |
| GPX4    | NM_001039847 | glutathione peroxidase 4 (phospholipid hydroperoxidase)                                      | 0 | 0 | 0 | 0 | 1 | 0 | 1 | 0 | hsa-miR-1908 | -0.28 | N/A | Sites in UTR |
| SAP18   | NM_005870    | Sin3A-associated protein, 18kDa                                                              | 0 | 0 | 0 | 0 | 1 | 0 | 1 | 0 | hsa-miR-1908 | -0.28 | N/A | Sites in UTR |
| SHPK    | NM_013276    | sedoheptulokinase                                                                            | 0 | 0 | 0 | 0 | 1 | 0 | 1 | 0 | hsa-miR-663  | -0.28 | N/A | Sites in UTR |
| HES2    | NM_019089    | hairy and enhancer of split 2 (Drosophila)                                                   | 0 | 0 | 0 | 0 | 1 | 0 | 1 | 0 | hsa-miR-1908 | -0.28 | N/A | Sites in UTR |
| WBSCR17 | NM_022479    | Williams-Beuren syndrome chromosome region 17                                                | 0 | 0 | 0 | 0 | 1 | 0 | 1 | 0 | hsa-miR-663  | -0.28 | N/A | Sites in UTR |
| STEAP3  | NM_001008410 | STEAP family member 3                                                                        | 0 | 0 | 0 | 0 | 1 | 1 | 0 | 0 | hsa-miR-663  | -0.28 | N/A | Sites in UTR |
| SLC7A4  | NM_004173    | solute carrier family 7 (orphan transporter), member 4                                       | 0 | 0 | 0 | 0 | 1 | 0 | 1 | 0 | hsa-miR-663  | -0.28 | N/A | Sites in UTR |

|              |              |                                                                                 |   |   |   |   |   |   |   |   |              |       |     |              |
|--------------|--------------|---------------------------------------------------------------------------------|---|---|---|---|---|---|---|---|--------------|-------|-----|--------------|
| SETD3        | NM_199123    | SET domain containing 3                                                         | 0 | 0 | 0 | 0 | 1 | 0 | 1 | 0 | hsa-miR-1908 | -0.28 | N/A | Sites in UTR |
| LOC100130705 | NM_001195150 | hypothetical protein LOC100130705                                               | 0 | 0 | 0 | 0 | 2 | 0 | 2 | 0 | hsa-miR-1908 | -0.28 | N/A | Sites in UTR |
| GPR83        | NM_016540    | G protein-coupled receptor 83                                                   | 0 | 0 | 0 | 0 | 2 | 0 | 1 | 1 | hsa-miR-1908 | -0.28 | N/A | Sites in UTR |
| CRISP1       | NM_001131    | cysteine-rich secretory protein 1                                               | 0 | 0 | 0 | 0 | 1 | 0 | 1 | 0 | hsa-miR-1908 | -0.28 | N/A | Sites in UTR |
| CYB561       | NM_001017916 | cytochrome b-561                                                                | 0 | 0 | 0 | 0 | 1 | 0 | 1 | 0 | hsa-miR-663  | -0.28 | N/A | Sites in UTR |
| FPGS         | NM_001018078 | folylpolyglutamate synthase                                                     | 0 | 0 | 0 | 0 | 1 | 0 | 1 | 0 | hsa-miR-663  | -0.28 | N/A | Sites in UTR |
| TGM3         | NM_003245    | transglutaminase 3 (E polypeptide, protein-glutamine-gamma-glutamyltransferase) | 0 | 0 | 0 | 0 | 1 | 0 | 1 | 0 | hsa-miR-1908 | -0.28 | N/A | Sites in UTR |
| ADAMTSL4     | NM_019032    | ADAMTS-like 4                                                                   | 0 | 0 | 0 | 0 | 1 | 0 | 1 | 0 | hsa-miR-663  | -0.28 | N/A | Sites in UTR |
| ACTR10       | NM_018477    | actin-related protein 10 homolog ( <i>S. cerevisiae</i> )                       | 0 | 0 | 0 | 0 | 1 | 0 | 1 | 0 | hsa-miR-1908 | -0.28 | N/A | Sites in UTR |
| CREB3L3      | NM_032607    | cAMP responsive element binding protein 3-like 3                                | 0 | 0 | 0 | 0 | 2 | 1 | 1 | 0 | hsa-miR-663  | -0.28 | N/A | Sites in UTR |
| LRTM2        | NM_001039029 | leucine-rich repeats and transmembrane domains 2                                | 0 | 0 | 0 | 0 | 1 | 0 | 1 | 0 | hsa-miR-663  | -0.28 | N/A | Sites in UTR |
| ATF7         | NM_001130059 | activating transcription factor 7                                               | 0 | 0 | 0 | 0 | 1 | 1 | 0 | 0 | hsa-miR-1908 | -0.28 | N/A | Sites in UTR |
| CRAT         | NM_000755    | carnitine O-acetyltransferase                                                   | 0 | 0 | 0 | 0 | 1 | 0 | 1 | 0 | hsa-miR-1908 | -0.28 | N/A | Sites in UTR |
| SUSD4        | NM_017982    | sushi domain containing 4                                                       | 0 | 0 | 0 | 0 | 1 | 0 | 1 | 0 | hsa-miR-1908 | -0.28 | N/A | Sites in UTR |
| ANKRD52      | NM_173595    | ankyrin repeat domain 52                                                        | 0 | 0 | 0 | 0 | 1 | 0 | 1 | 0 | hsa-miR-663  | -0.28 | N/A | Sites in UTR |
| PTGER3       | NM_198714    | prostaglandin E receptor 3 (subtype EP3)                                        | 0 | 0 | 0 | 0 | 1 | 0 | 0 | 1 | hsa-miR-1908 | -0.28 | N/A | Sites in UTR |
| ZIC2         | NM_007129    | Zic family member 2                                                             | 0 | 0 | 0 | 0 | 1 | 0 | 1 | 0 | hsa-miR-663  | -0.28 | N/A | Sites in UTR |
| DLC1         | NM_001164271 | deleted in liver cancer 1                                                       | 0 | 0 | 0 | 0 | 1 | 0 | 1 | 0 | hsa-miR-663  | -0.28 | N/A | Sites in UTR |
| LPIN1        | NM_145693    | lipin 1                                                                         | 0 | 0 | 0 | 0 | 1 | 0 | 1 | 0 | hsa-miR-663  | -0.28 | N/A | Sites in UTR |
| AGAP2        | NM_001122772 | ArfGAP with GTPase domain, ankyrin repeat and PH domain 2                       | 0 | 0 | 0 | 0 | 1 | 0 | 1 | 0 | hsa-miR-663  | -0.28 | N/A | Sites in UTR |

|          |              |                                                                |   |   |   |   |   |   |   |   |              |       |     |              |
|----------|--------------|----------------------------------------------------------------|---|---|---|---|---|---|---|---|--------------|-------|-----|--------------|
| ANPEP    | NM_001150    | alanyl (membrane) aminopeptidase                               | 0 | 0 | 0 | 0 | 1 | 0 | 1 | 0 | hsa-miR-1908 | -0.27 | N/A | Sites in UTR |
| LRP1     | NM_002332    | low density lipoprotein receptor-related protein 1             | 0 | 0 | 0 | 0 | 1 | 0 | 1 | 0 | hsa-miR-663  | -0.27 | N/A | Sites in UTR |
| SCGB3A1  | NM_052863    | secretoglobin, family 3A, member 1                             | 0 | 0 | 0 | 0 | 1 | 0 | 1 | 0 | hsa-miR-663  | -0.27 | N/A | Sites in UTR |
| CDAN1    | NM_138477    | congenital dyserythropoietic anemia, type I                    | 0 | 0 | 0 | 0 | 1 | 0 | 1 | 0 | hsa-miR-663  | -0.27 | N/A | Sites in UTR |
| MUM1     | NM_032853    | melanoma associated antigen (mutated) 1                        | 0 | 0 | 0 | 0 | 2 | 0 | 1 | 1 | hsa-miR-663  | -0.27 | N/A | Sites in UTR |
| EPHB4    | NM_004444    | EPH receptor B4                                                | 0 | 0 | 0 | 0 | 1 | 0 | 1 | 0 | hsa-miR-1908 | -0.27 | N/A | Sites in UTR |
| ZNF19    | NM_006961    | zinc finger protein 19                                         | 0 | 0 | 0 | 0 | 1 | 0 | 1 | 0 | hsa-miR-1908 | -0.27 | N/A | Sites in UTR |
| TENC1    | NM_015319    | tensin like C1 domain containing phosphatase (tensin 2)        | 0 | 0 | 0 | 0 | 1 | 0 | 1 | 0 | hsa-miR-1908 | -0.27 | N/A | Sites in UTR |
| FAM63A   | NM_001040217 | family with sequence similarity 63, member A                   | 0 | 0 | 0 | 0 | 1 | 0 | 1 | 0 | hsa-miR-663  | -0.27 | N/A | Sites in UTR |
| CCDC64B  | NM_001103175 | coiled-coil domain containing 64B                              | 0 | 0 | 0 | 0 | 1 | 0 | 1 | 0 | hsa-miR-1908 | -0.27 | N/A | Sites in UTR |
| RAP1GAP2 | NM_001100398 | RAP1 GTPase activating protein 2                               | 0 | 0 | 0 | 0 | 1 | 1 | 0 | 0 | hsa-miR-1908 | -0.27 | N/A | Sites in UTR |
| CTBP1    | NM_001012614 | C-terminal binding protein 1                                   | 0 | 0 | 0 | 0 | 1 | 0 | 1 | 0 | hsa-miR-663  | -0.27 | N/A | Sites in UTR |
| POU2F2   | NM_001207025 | POU class 2 homeobox 2                                         | 1 | 0 | 1 | 0 | 0 | 0 | 0 | 0 | hsa-miR-1908 | -0.27 | N/A | Sites in UTR |
| PACSIN1  | NM_001199583 | protein kinase C and casein kinase substrate in neurons 1      | 0 | 0 | 0 | 0 | 1 | 0 | 1 | 0 | hsa-miR-663  | -0.27 | N/A | Sites in UTR |
| NCKAP5L  | NM_001037806 | NCK-associated protein 5-like                                  | 0 | 0 | 0 | 0 | 1 | 0 | 1 | 0 | hsa-miR-1908 | -0.27 | N/A | Sites in UTR |
| CD27     | NM_001242    | CD27 molecule                                                  | 0 | 0 | 0 | 0 | 1 | 0 | 1 | 0 | hsa-miR-663  | -0.27 | N/A | Sites in UTR |
| GTF3C1   | NM_001520    | general transcription factor IIIC, polypeptide 1, alpha 220kDa | 0 | 0 | 0 | 0 | 1 | 0 | 1 | 0 | hsa-miR-663  | -0.27 | N/A | Sites in UTR |
| DGKD     | NM_003648    | diacylglycerol kinase, delta 130kDa                            | 0 | 0 | 0 | 0 | 1 | 0 | 1 | 0 | hsa-miR-1908 | -0.27 | N/A | Sites in UTR |
| HIF1AN   | NM_017902    | hypoxia inducible factor 1, alpha subunit inhibitor            | 0 | 0 | 0 | 0 | 1 | 0 | 1 | 0 | hsa-miR-1908 | -0.27 | N/A | Sites in UTR |
| C8orf73  | NM_001100878 | chromosome 8 open reading frame 73                             | 0 | 0 | 0 | 0 | 1 | 0 | 1 | 0 | hsa-miR-1908 | -0.27 | N/A | Sites in UTR |

|         |              |                                                                                     |   |   |   |   |   |   |   |   |              |       |     |              |
|---------|--------------|-------------------------------------------------------------------------------------|---|---|---|---|---|---|---|---|--------------|-------|-----|--------------|
| MTRF1L  | NM_001114184 | mitochondrial translational release factor 1-like                                   | 0 | 0 | 0 | 0 | 1 | 1 | 0 | 0 | hsa-miR-663  | -0.27 | N/A | Sites in UTR |
| MPST    | NM_001013436 | mercaptopyruvate sulfurtransferase                                                  | 0 | 0 | 0 | 0 | 1 | 0 | 1 | 0 | hsa-miR-663  | -0.27 | N/A | Sites in UTR |
| RAB5C   | NM_004583    | RAB5C, member RAS oncogene family                                                   | 0 | 0 | 0 | 0 | 1 | 0 | 1 | 0 | hsa-miR-663  | -0.27 | N/A | Sites in UTR |
| GPR37L1 | NM_004767    | G protein-coupled receptor 37 like 1                                                | 0 | 0 | 0 | 0 | 1 | 0 | 1 | 0 | hsa-miR-663  | -0.27 | N/A | Sites in UTR |
| PHPT1   | NM_001135861 | phosphohistidine phosphatase 1                                                      | 0 | 0 | 0 | 0 | 1 | 0 | 1 | 0 | hsa-miR-1908 | -0.27 | N/A | Sites in UTR |
| NUB1    | NM_016118    | negative regulator of ubiquitin-like proteins 1                                     | 0 | 0 | 0 | 0 | 1 | 0 | 1 | 0 | hsa-miR-663  | -0.27 | N/A | Sites in UTR |
| CTDSP1  | NM_001206878 | CTD (carboxy-terminal domain, RNA polymerase II, polypeptide A) small phosphatase 1 | 0 | 0 | 0 | 0 | 1 | 0 | 1 | 0 | hsa-miR-663  | -0.27 | N/A | Sites in UTR |
| RCOR2   | NM_173587    | REST corepressor 2                                                                  | 0 | 0 | 0 | 0 | 1 | 0 | 1 | 0 | hsa-miR-1908 | -0.27 | N/A | Sites in UTR |
| MUC21   | NM_001010909 | mucin 21, cell surface associated                                                   | 0 | 0 | 0 | 0 | 1 | 0 | 1 | 0 | hsa-miR-1908 | -0.27 | N/A | Sites in UTR |
| FOXL2   | NM_023067    | forkhead box L2                                                                     | 0 | 0 | 0 | 0 | 1 | 0 | 1 | 0 | hsa-miR-663  | -0.27 | N/A | Sites in UTR |
| MEN1    | NM_000244    | multiple endocrine neoplasia I                                                      | 0 | 0 | 0 | 0 | 1 | 0 | 1 | 0 | hsa-miR-1908 | -0.27 | N/A | Sites in UTR |
| ROR2    | NM_004560    | receptor tyrosine kinase-like orphan receptor 2                                     | 0 | 0 | 0 | 0 | 1 | 0 | 1 | 0 | hsa-miR-1908 | -0.27 | N/A | Sites in UTR |
| PRSS33  | NM_152891    | protease, serine, 33                                                                | 0 | 0 | 0 | 0 | 1 | 0 | 1 | 0 | hsa-miR-1908 | -0.27 | N/A | Sites in UTR |
| SH2D5   | NM_001103160 | SH2 domain containing 5                                                             | 0 | 0 | 0 | 0 | 1 | 0 | 1 | 0 | hsa-miR-663  | -0.27 | N/A | Sites in UTR |
| RPS6KA2 | NM_001006932 | ribosomal protein S6 kinase, 90kDa, polypeptide 2                                   | 0 | 0 | 0 | 0 | 1 | 0 | 1 | 0 | hsa-miR-663  | -0.27 | N/A | Sites in UTR |
| FKBP9   | NM_007270    | FK506 binding protein 9, 63 kDa                                                     | 0 | 0 | 0 | 0 | 1 | 0 | 1 | 0 | hsa-miR-1908 | -0.27 | N/A | Sites in UTR |
| SDHAF2  | NM_017841    | succinate dehydrogenase complex assembly factor 2                                   | 0 | 0 | 0 | 0 | 1 | 0 | 1 | 0 | hsa-miR-663  | -0.27 | N/A | Sites in UTR |
| KLK15   | NM_017509    | kallikrein-related peptidase 15                                                     | 0 | 0 | 0 | 0 | 1 | 0 | 1 | 0 | hsa-miR-663  | -0.27 | N/A | Sites in UTR |
| KRT71   | NM_033448    | keratin 71                                                                          | 0 | 0 | 0 | 0 | 1 | 0 | 1 | 0 | hsa-miR-663  | -0.27 | N/A | Sites in UTR |
| SYNGR2  | NM_004710    | synaptogyrin 2                                                                      | 0 | 0 | 0 | 0 | 1 | 0 | 1 | 0 | hsa-miR-1908 | -0.27 | N/A | Sites in UTR |

|          |              |                                                        |   |   |   |   |   |   |   |   |              |       |     |              |
|----------|--------------|--------------------------------------------------------|---|---|---|---|---|---|---|---|--------------|-------|-----|--------------|
| ARFRP1   | NM_001134758 | ADP-ribosylation factor related protein 1              | 0 | 0 | 0 | 0 | 1 | 0 | 1 | 0 | hsa-miR-663  | -0.27 | N/A | Sites in UTR |
| ATL2     | NM_001135673 | atlastin GTPase 2                                      | 0 | 0 | 0 | 0 | 1 | 0 | 1 | 0 | hsa-miR-1908 | -0.27 | N/A | Sites in UTR |
| PASD1    | NM_173493    | PAS domain containing 1                                | 0 | 0 | 0 | 0 | 1 | 0 | 1 | 0 | hsa-miR-1908 | -0.27 | N/A | Sites in UTR |
| MSLN     | NM_001177355 | mesothelin                                             | 0 | 0 | 0 | 0 | 1 | 0 | 1 | 0 | hsa-miR-663  | -0.27 | N/A | Sites in UTR |
| XPO6     | NM_015171    | exportin 6                                             | 0 | 0 | 0 | 0 | 1 | 0 | 1 | 0 | hsa-miR-1908 | -0.27 | N/A | Sites in UTR |
| SUN2     | NM_001199579 | Sad1 and UNC84 domain containing 2                     | 0 | 0 | 0 | 0 | 1 | 0 | 1 | 0 | hsa-miR-1908 | -0.27 | N/A | Sites in UTR |
| BEND3    | NM_001080450 | BEN domain containing 3                                | 0 | 0 | 0 | 0 | 1 | 0 | 1 | 0 | hsa-miR-663  | -0.27 | N/A | Sites in UTR |
| C10orf95 | NM_024886    | chromosome 10 open reading frame 95                    | 0 | 0 | 0 | 0 | 1 | 0 | 1 | 0 | hsa-miR-663  | -0.27 | N/A | Sites in UTR |
| FAM123A  | NM_152704    | family with sequence similarity 123A                   | 0 | 0 | 0 | 0 | 1 | 0 | 1 | 0 | hsa-miR-663  | -0.27 | N/A | Sites in UTR |
| GP1BB    | NM_000407    | glycoprotein Ib (platelet), beta polypeptide           | 0 | 0 | 0 | 0 | 1 | 0 | 1 | 0 | hsa-miR-663  | -0.27 | N/A | Sites in UTR |
| CORO2B   | NM_001190456 | coronin, actin binding protein, 2B                     | 0 | 0 | 0 | 0 | 1 | 0 | 1 | 0 | hsa-miR-663  | -0.27 | N/A | Sites in UTR |
| MAP1LC3A | NM_032514    | microtubule-associated protein 1 light chain 3 alpha   | 0 | 0 | 0 | 0 | 1 | 0 | 1 | 0 | hsa-miR-663  | -0.27 | N/A | Sites in UTR |
| HS3ST5   | NM_153612    | heparan sulfatase (glucosamine) 3-O-sulfotransferase 5 | 0 | 0 | 0 | 0 | 1 | 0 | 0 | 1 | hsa-miR-1908 | -0.26 | N/A | Sites in UTR |
| RGS19    | NM_001039467 | regulator of G-protein signaling 19                    | 0 | 0 | 0 | 0 | 1 | 0 | 1 | 0 | hsa-miR-663  | -0.26 | N/A | Sites in UTR |
| FBXW8    | NM_012174    | F-box and WD repeat domain containing 8                | 0 | 0 | 0 | 0 | 1 | 0 | 1 | 0 | hsa-miR-1908 | -0.26 | N/A | Sites in UTR |
| ASCL4    | NM_203436    | achaete-scute complex homolog 4 (Drosophila)           | 0 | 0 | 0 | 0 | 1 | 0 | 1 | 0 | hsa-miR-663  | -0.26 | N/A | Sites in UTR |
| NPAS4    | NM_178864    | neuronal PAS domain protein 4                          | 0 | 0 | 0 | 0 | 1 | 0 | 1 | 0 | hsa-miR-1908 | -0.26 | N/A | Sites in UTR |
| MUC13    | NM_033049    | mucin 13, cell surface associated                      | 0 | 0 | 0 | 0 | 1 | 0 | 0 | 1 | hsa-miR-1908 | -0.26 | N/A | Sites in UTR |
| TIAM1    | NM_003253    | T-cell lymphoma invasion and metastasis 1              | 0 | 0 | 0 | 0 | 1 | 0 | 1 | 0 | hsa-miR-663  | -0.26 | N/A | Sites in UTR |
| H2AFY2   | NM_018649    | H2A histone family, member Y2                          | 0 | 0 | 0 | 0 | 1 | 0 | 1 | 0 | hsa-miR-1908 | -0.26 | N/A | Sites in UTR |

|          |              |                                                                        |   |   |   |   |   |   |   |   |              |       |     |              |
|----------|--------------|------------------------------------------------------------------------|---|---|---|---|---|---|---|---|--------------|-------|-----|--------------|
| TRIM36   | NM_001017398 | tripartite motif containing 36                                         | 0 | 0 | 0 | 0 | 1 | 0 | 1 | 0 | hsa-miR-1908 | -0.26 | N/A | Sites in UTR |
| LRRC3    | NM_030891    | leucine rich repeat containing 3                                       | 0 | 0 | 0 | 0 | 1 | 0 | 1 | 0 | hsa-miR-663  | -0.26 | N/A | Sites in UTR |
| FIGNL2   | NM_001013690 | fidgetin-like 2                                                        | 0 | 0 | 0 | 0 | 1 | 0 | 1 | 0 | hsa-miR-663  | -0.26 | N/A | Sites in UTR |
| SBK1     | NM_001024401 | SH3-binding domain kinase 1                                            | 0 | 0 | 0 | 0 | 2 | 0 | 2 | 0 | hsa-miR-1908 | -0.26 | N/A | Sites in UTR |
| LGI2     | NM_018176    | leucine-rich repeat LGI family, member 2                               | 0 | 0 | 0 | 0 | 1 | 1 | 0 | 0 | hsa-miR-1908 | -0.26 | N/A | Sites in UTR |
| FOXP1    | NM_001037165 | forkhead box K1                                                        | 0 | 0 | 0 | 0 | 2 | 1 | 1 | 0 | hsa-miR-1908 | -0.26 | N/A | Sites in UTR |
| PRICKLE3 | NM_006150    | prickle homolog 3 (Drosophila)                                         | 0 | 0 | 0 | 0 | 1 | 0 | 1 | 0 | hsa-miR-663  | -0.26 | N/A | Sites in UTR |
| MVD      | NM_002461    | mevalonate (diphospho) decarboxylase                                   | 0 | 0 | 0 | 0 | 1 | 0 | 1 | 0 | hsa-miR-663  | -0.26 | N/A | Sites in UTR |
| CIB2     | NM_006383    | calcium and integrin binding family member 2                           | 0 | 0 | 0 | 0 | 1 | 0 | 1 | 0 | hsa-miR-663  | -0.26 | N/A | Sites in UTR |
| KAT5     | NM_001206833 | K(lysine) acetyltransferase 5                                          | 0 | 0 | 0 | 0 | 1 | 0 | 1 | 0 | hsa-miR-1908 | -0.26 | N/A | Sites in UTR |
| ATP5D    | NM_001001975 | ATP synthase, H+ transporting, mitochondrial F1 complex, delta subunit | 0 | 0 | 0 | 0 | 1 | 0 | 1 | 0 | hsa-miR-663  | -0.26 | N/A | Sites in UTR |
| DLG4     | NM_001128827 | discs, large homolog 4 (Drosophila)                                    | 0 | 0 | 0 | 0 | 1 | 0 | 1 | 0 | hsa-miR-663  | -0.26 | N/A | Sites in UTR |
| SIN3B    | NM_015260    | SIN3 homolog B, transcription regulator (yeast)                        | 0 | 0 | 0 | 0 | 1 | 0 | 1 | 0 | hsa-miR-663  | -0.26 | N/A | Sites in UTR |
| SS18L1   | NM_198935    | synovial sarcoma translocation gene on chromosome 18-like 1            | 0 | 0 | 0 | 0 | 1 | 0 | 1 | 0 | hsa-miR-663  | -0.26 | N/A | Sites in UTR |
| ARHGAP39 | NM_025251    | Rho GTPase activating protein 39                                       | 0 | 0 | 0 | 0 | 1 | 0 | 1 | 0 | hsa-miR-663  | -0.26 | N/A | Sites in UTR |
| OLIG1    | NM_138983    | oligodendrocyte transcription factor 1                                 | 0 | 0 | 0 | 0 | 1 | 0 | 1 | 0 | hsa-miR-663  | -0.26 | N/A | Sites in UTR |
| IL34     | NM_001172771 | interleukin 34                                                         | 0 | 0 | 0 | 0 | 1 | 0 | 1 | 0 | hsa-miR-1908 | -0.26 | N/A | Sites in UTR |
| SNRNP48  | NM_152551    | small nuclear ribonucleoprotein 48kDa (U11/U12)                        | 0 | 0 | 0 | 0 | 1 | 0 | 1 | 0 | hsa-miR-663  | -0.26 | N/A | Sites in UTR |
| PLAGL2   | NM_002657    | pleiomorphic adenoma gene-like 2                                       | 0 | 0 | 0 | 0 | 2 | 0 | 2 | 0 | hsa-miR-663  | -0.26 | N/A | Sites in UTR |
| SPTB     | NM_000347    | spectrin, beta, erythrocytic                                           | 0 | 0 | 0 | 0 | 1 | 0 | 1 | 0 | hsa-miR-663  | -0.26 | N/A | Sites in UTR |



|         |              |                                                        |   |   |   |   |   |   |   |   |              |       |     |              |
|---------|--------------|--------------------------------------------------------|---|---|---|---|---|---|---|---|--------------|-------|-----|--------------|
| DPPA4   | NM_018189    | developmental pluripotency associated 4                | 0 | 0 | 0 | 0 | 1 | 0 | 1 | 0 | hsa-miR-663  | -0.26 | N/A | Sites in UTR |
| MAVS    | NM_001206491 | mitochondrial antiviral signaling protein              | 0 | 0 | 0 | 0 | 3 | 0 | 1 | 2 | hsa-miR-663  | -0.26 | N/A | Sites in UTR |
| DBN1    | NM_004395    | drebrin 1                                              | 0 | 0 | 0 | 0 | 1 | 0 | 1 | 0 | hsa-miR-663  | -0.26 | N/A | Sites in UTR |
| PRRG2   | NM_000951    | proline rich Gla (G-carboxyglutamic acid) 2            | 0 | 0 | 0 | 0 | 1 | 0 | 1 | 0 | hsa-miR-663  | -0.26 | N/A | Sites in UTR |
| PRAP1   | NM_001145201 | proline-rich acidic protein 1                          | 0 | 0 | 0 | 0 | 1 | 0 | 1 | 0 | hsa-miR-1908 | -0.26 | N/A | Sites in UTR |
| XRRA1   | NM_182969    | X-ray radiation resistance associated 1                | 0 | 0 | 0 | 0 | 1 | 0 | 1 | 0 | hsa-miR-1908 | -0.26 | N/A | Sites in UTR |
| IL4R    | NM_000418    | interleukin 4 receptor                                 | 0 | 0 | 0 | 0 | 1 | 0 | 1 | 0 | hsa-miR-1908 | -0.26 | N/A | Sites in UTR |
| UNC13A  | NM_001080421 | unc-13 homolog A (C. elegans)                          | 1 | 0 | 1 | 0 | 0 | 0 | 0 | 0 | hsa-miR-1908 | -0.26 | N/A | Sites in UTR |
| CNTF    | NM_000614    | ciliary neurotrophic factor                            | 0 | 0 | 0 | 0 | 1 | 0 | 0 | 1 | hsa-miR-1908 | -0.26 | N/A | Sites in UTR |
| EN1     | NM_001426    | engrailed homeobox 1                                   | 0 | 0 | 0 | 0 | 1 | 0 | 1 | 0 | hsa-miR-1908 | -0.26 | N/A | Sites in UTR |
| CDK5R2  | NM_003936    | cyclin-dependent kinase 5, regulatory subunit 2 (p39)  | 0 | 0 | 0 | 0 | 1 | 0 | 1 | 0 | hsa-miR-663  | -0.26 | N/A | Sites in UTR |
| SOCS6   | NM_004232    | suppressor of cytokine signaling 6                     | 0 | 0 | 0 | 0 | 1 | 0 | 1 | 0 | hsa-miR-1908 | -0.26 | N/A | Sites in UTR |
| PITPNM3 | NM_001165966 | PITPNM family member 3                                 | 1 | 0 | 1 | 0 | 0 | 0 | 0 | 0 | hsa-miR-1908 | -0.26 | N/A | Sites in UTR |
| KLF16   | NM_031918    | Kruppel-like factor 16                                 | 0 | 0 | 0 | 0 | 1 | 0 | 1 | 0 | hsa-miR-1908 | -0.26 | N/A | Sites in UTR |
| FGD3    | NM_001083536 | FYVE, RhoGEF and PH domain containing 3                | 0 | 0 | 0 | 0 | 1 | 0 | 1 | 0 | hsa-miR-663  | -0.26 | N/A | Sites in UTR |
| S100A16 | NM_080388    | S100 calcium binding protein A16                       | 0 | 0 | 0 | 0 | 1 | 0 | 1 | 0 | hsa-miR-663  | -0.26 | N/A | Sites in UTR |
| PIM3    | NM_001001852 | pim-3 oncogene                                         | 0 | 0 | 0 | 0 | 1 | 0 | 1 | 0 | hsa-miR-663  | -0.26 | N/A | Sites in UTR |
| TGFB111 | NM_001042454 | transforming growth factor beta 1 induced transcript 1 | 0 | 0 | 0 | 0 | 1 | 0 | 1 | 0 | hsa-miR-663  | -0.26 | N/A | Sites in UTR |
| CGGBP1  | NM_001008390 | CGG triplet repeat binding protein 1                   | 0 | 0 | 0 | 0 | 1 | 0 | 1 | 0 | hsa-miR-1908 | -0.26 | N/A | Sites in UTR |
| ARTN    | NM_001136215 | artemin                                                | 0 | 0 | 0 | 0 | 1 | 0 | 1 | 0 | hsa-miR-1908 | -0.26 | N/A | Sites in UTR |

|          |              |                                                                          |   |   |   |   |   |   |   |   |              |       |     |              |
|----------|--------------|--------------------------------------------------------------------------|---|---|---|---|---|---|---|---|--------------|-------|-----|--------------|
| PGBD5    | NM_024554    | piggyBac transposable element derived 5                                  | 0 | 0 | 0 | 0 | 1 | 0 | 1 | 0 | hsa-miR-1908 | -0.26 | N/A | Sites in UTR |
| C1orf95  | NM_001003665 | chromosome 1 open reading frame 95                                       | 0 | 0 | 0 | 0 | 2 | 0 | 2 | 0 | hsa-miR-663  | -0.26 | N/A | Sites in UTR |
| PTPRF    | NM_002840    | protein tyrosine phosphatase, receptor type, F                           | 0 | 0 | 0 | 0 | 1 | 0 | 1 | 0 | hsa-miR-663  | -0.25 | N/A | Sites in UTR |
| MAP4K2   | NM_004579    | mitogen-activated protein kinase kinase kinase kinase 2                  | 0 | 0 | 0 | 0 | 1 | 0 | 1 | 0 | hsa-miR-663  | -0.25 | N/A | Sites in UTR |
| DGKZ     | NM_001105540 | diacylglycerol kinase, zeta                                              | 0 | 0 | 0 | 0 | 1 | 0 | 1 | 0 | hsa-miR-663  | -0.25 | N/A | Sites in UTR |
| PAK4     | NM_001014831 | p21 protein (Cdc42/Rac)-activated kinase 4                               | 0 | 0 | 0 | 0 | 1 | 0 | 1 | 0 | hsa-miR-663  | -0.25 | N/A | Sites in UTR |
| PCSK4    | NM_017573    | proprotein convertase subtilisin/kexin type 4                            | 0 | 0 | 0 | 0 | 1 | 0 | 1 | 0 | hsa-miR-663  | -0.25 | N/A | Sites in UTR |
| THTPA    | NM_001126339 | thiamine triphosphatase                                                  | 0 | 0 | 0 | 0 | 1 | 0 | 1 | 0 | hsa-miR-1908 | -0.25 | N/A | Sites in UTR |
| RELL2    | NM_001130029 | RELT-like 2                                                              | 0 | 0 | 0 | 0 | 1 | 0 | 1 | 0 | hsa-miR-1908 | -0.25 | N/A | Sites in UTR |
| APOE     | NM_000041    | apolipoprotein E                                                         | 0 | 0 | 0 | 0 | 1 | 0 | 1 | 0 | hsa-miR-663  | -0.25 | N/A | Sites in UTR |
| KCNAB3   | NM_004732    | potassium voltage-gated channel, shaker-related subfamily, beta member 3 | 1 | 0 | 1 | 0 | 0 | 0 | 0 | 0 | hsa-miR-663  | -0.25 | N/A | Sites in UTR |
| STMN3    | NM_015894    | stathmin-like 3                                                          | 0 | 0 | 0 | 0 | 1 | 0 | 1 | 0 | hsa-miR-663  | -0.25 | N/A | Sites in UTR |
| PARP10   | NM_032789    | poly (ADP-ribose) polymerase family, member 10                           | 0 | 0 | 0 | 0 | 1 | 0 | 1 | 0 | hsa-miR-1908 | -0.25 | N/A | Sites in UTR |
| ADAMTS14 | NM_080722    | ADAM metalloproteinase with thrombospondin type 1 motif, 14              | 0 | 0 | 0 | 0 | 1 | 0 | 1 | 0 | hsa-miR-663  | -0.25 | N/A | Sites in UTR |
| ZNF865   | NM_001195605 | zinc finger protein 865                                                  | 0 | 0 | 0 | 0 | 1 | 0 | 1 | 0 | hsa-miR-663  | -0.25 | N/A | Sites in UTR |
| FLNA     | NM_001110556 | filamin A, alpha                                                         | 0 | 0 | 0 | 0 | 1 | 0 | 1 | 0 | hsa-miR-663  | -0.25 | N/A | Sites in UTR |
| MAPT     | NM_001123066 | microtubule-associated protein tau                                       | 0 | 0 | 0 | 0 | 1 | 0 | 1 | 0 | hsa-miR-663  | -0.25 | N/A | Sites in UTR |
| PNPLA2   | NM_020376    | patatin-like phospholipase domain containing 2                           | 0 | 0 | 0 | 0 | 1 | 0 | 1 | 0 | hsa-miR-663  | -0.25 | N/A | Sites in UTR |
| PDZD4    | NM_032512    | PDZ domain containing 4                                                  | 0 | 0 | 0 | 0 | 1 | 0 | 1 | 0 | hsa-miR-663  | -0.25 | N/A | Sites in UTR |
| PRDM12   | NM_021619    | PR domain containing 12                                                  | 0 | 0 | 0 | 0 | 2 | 0 | 2 | 0 | hsa-miR-1908 | -0.25 | N/A | Sites in UTR |

|         |              |                                                                                                           |   |   |   |   |   |   |   |   |              |       |     |              |
|---------|--------------|-----------------------------------------------------------------------------------------------------------|---|---|---|---|---|---|---|---|--------------|-------|-----|--------------|
| SH2D4A  | NM_001174159 | SH2 domain containing 4A                                                                                  | 0 | 0 | 0 | 0 | 1 | 0 | 1 | 0 | hsa-miR-1908 | -0.25 | N/A | Sites in UTR |
| TNS4    | NM_032865    | tensin 4                                                                                                  | 0 | 0 | 0 | 0 | 1 | 0 | 1 | 0 | hsa-miR-1908 | -0.25 | N/A | Sites in UTR |
| DOK7    | NM_001164673 | docking protein 7                                                                                         | 0 | 0 | 0 | 0 | 1 | 0 | 1 | 0 | hsa-miR-663  | -0.25 | N/A | Sites in UTR |
| TBX10   | NM_005995    | T-box 10                                                                                                  | 0 | 0 | 0 | 0 | 1 | 0 | 1 | 0 | hsa-miR-1908 | -0.25 | N/A | Sites in UTR |
| SAMD4A  | NM_001161576 | sterile alpha motif domain containing 4A                                                                  | 0 | 0 | 0 | 0 | 1 | 1 | 0 | 0 | hsa-miR-663  | -0.25 | N/A | Sites in UTR |
| BRF1    | NM_001242786 | BRF1 homolog, subunit of RNA polymerase III transcription initiation factor IIIB ( <i>S. cerevisiae</i> ) | 0 | 0 | 0 | 0 | 1 | 0 | 1 | 0 | hsa-miR-663  | -0.25 | N/A | Sites in UTR |
| S1PR2   | NM_004230    | sphingosine-1-phosphate receptor 2                                                                        | 0 | 0 | 0 | 0 | 1 | 0 | 1 | 0 | hsa-miR-663  | -0.25 | N/A | Sites in UTR |
| STARD8  | NM_001142503 | StAR-related lipid transfer (START) domain containing 8                                                   | 0 | 0 | 0 | 0 | 1 | 0 | 1 | 0 | hsa-miR-1908 | -0.25 | N/A | Sites in UTR |
| EFR3B   | NM_014971    | EFR3 homolog B ( <i>S. cerevisiae</i> )                                                                   | 0 | 0 | 0 | 0 | 1 | 0 | 1 | 0 | hsa-miR-663  | -0.25 | N/A | Sites in UTR |
| DDN     | NM_015086    | dendrin                                                                                                   | 0 | 0 | 0 | 0 | 1 | 0 | 1 | 0 | hsa-miR-663  | -0.25 | N/A | Sites in UTR |
| C4orf3  | NM_001001701 | chromosome 4 open reading frame 3                                                                         | 0 | 0 | 0 | 0 | 1 | 0 | 1 | 0 | hsa-miR-1908 | -0.25 | N/A | Sites in UTR |
| GAS1    | NM_002048    | growth arrest-specific 1                                                                                  | 0 | 0 | 0 | 0 | 2 | 0 | 2 | 0 | hsa-miR-1908 | -0.25 | N/A | Sites in UTR |
| KCNG1   | NM_002237    | potassium voltage-gated channel, subfamily G, member 1                                                    | 0 | 0 | 0 | 0 | 1 | 0 | 1 | 0 | hsa-miR-1908 | -0.25 | N/A | Sites in UTR |
| MIER2   | NM_017550    | mesoderm induction early response 1, family member 2                                                      | 0 | 0 | 0 | 0 | 1 | 0 | 1 | 0 | hsa-miR-1908 | -0.25 | N/A | Sites in UTR |
| SLITRK1 | NM_052910    | SLIT and NTRK-like family, member 1                                                                       | 0 | 0 | 0 | 0 | 1 | 0 | 1 | 0 | hsa-miR-663  | -0.25 | N/A | Sites in UTR |
| PLD4    | NM_138790    | phospholipase D family, member 4                                                                          | 0 | 0 | 0 | 0 | 1 | 0 | 1 | 0 | hsa-miR-1908 | -0.25 | N/A | Sites in UTR |
| TLX2    | NM_016170    | T-cell leukemia homeobox 2                                                                                | 1 | 0 | 0 | 1 | 0 | 0 | 0 | 0 | hsa-miR-663  | -0.25 | N/A | Sites in UTR |
| FAM157A | NM_001145248 | family with sequence similarity 157, member A                                                             | 0 | 0 | 0 | 0 | 1 | 0 | 0 | 1 | hsa-miR-663  | -0.25 | N/A | Sites in UTR |
| ARRB2   | NM_004313    | arrestin, beta 2                                                                                          | 0 | 0 | 0 | 0 | 1 | 0 | 1 | 0 | hsa-miR-1908 | -0.25 | N/A | Sites in UTR |
| HNF4A   | NM_000457    | hepatocyte nuclear factor 4, alpha                                                                        | 0 | 0 | 0 | 0 | 1 | 0 | 1 | 0 | hsa-miR-1908 | -0.25 | N/A | Sites in UTR |

|           |              |                                                                   |   |   |   |   |   |   |   |   |              |       |     |              |
|-----------|--------------|-------------------------------------------------------------------|---|---|---|---|---|---|---|---|--------------|-------|-----|--------------|
| KLHL6     | NM_130446    | kelch-like 6 (Drosophila)                                         | 0 | 0 | 0 | 0 | 1 | 0 | 1 | 0 | hsa-miR-663  | -0.25 | N/A | Sites in UTR |
| KCNC1     | NM_004976    | potassium voltage-gated channel, Shaw-related subfamily, member 1 | 0 | 0 | 0 | 0 | 2 | 0 | 1 | 1 | hsa-miR-663  | -0.25 | N/A | Sites in UTR |
| SYCE1L    | NM_001129979 | synaptonemal complex central element protein 1-like               | 0 | 0 | 0 | 0 | 1 | 0 | 0 | 1 | hsa-miR-1908 | -0.25 | N/A | Sites in UTR |
| PBMUCL1   | NM_001198815 | panbronchiolitis related mucin-like 1                             | 0 | 0 | 0 | 0 | 1 | 0 | 0 | 1 | hsa-miR-663  | -0.25 | N/A | Sites in UTR |
| ADAM11    | NM_002390    | ADAM metallopeptidase domain 11                                   | 0 | 0 | 0 | 0 | 1 | 0 | 1 | 0 | hsa-miR-1908 | -0.25 | N/A | Sites in UTR |
| PITX1     | NM_002653    | paired-like homeodomain 1                                         | 0 | 0 | 0 | 0 | 2 | 0 | 2 | 0 | hsa-miR-663  | -0.25 | N/A | Sites in UTR |
| SALL1     | NM_001127892 | sal-like 1 (Drosophila)                                           | 0 | 0 | 0 | 0 | 1 | 0 | 1 | 0 | hsa-miR-663  | -0.25 | N/A | Sites in UTR |
| KLF10     | NM_001032282 | Kruppel-like factor 10                                            | 0 | 0 | 0 | 0 | 1 | 0 | 1 | 0 | hsa-miR-1908 | -0.25 | N/A | Sites in UTR |
| GIPC1     | NM_005716    | GIPC PDZ domain containing family, member 1                       | 0 | 0 | 0 | 0 | 1 | 0 | 1 | 0 | hsa-miR-663  | -0.25 | N/A | Sites in UTR |
| GUF1      | NM_021927    | GUF1 GTPase homolog ( <i>S. cerevisiae</i> )                      | 0 | 0 | 0 | 0 | 1 | 0 | 1 | 0 | hsa-miR-1908 | -0.25 | N/A | Sites in UTR |
| PGAP3     | NM_033419    | post-GPI attachment to proteins 3                                 | 0 | 0 | 0 | 0 | 1 | 0 | 1 | 0 | hsa-miR-1908 | -0.25 | N/A | Sites in UTR |
| FAM78A    | NM_033387    | family with sequence similarity 78, member A                      | 0 | 0 | 0 | 0 | 1 | 0 | 1 | 0 | hsa-miR-663  | -0.25 | N/A | Sites in UTR |
| ZNF324B   | NM_207395    | zinc finger protein 324B                                          | 0 | 0 | 0 | 0 | 1 | 0 | 1 | 0 | hsa-miR-1908 | -0.25 | N/A | Sites in UTR |
| C14orf119 | NM_017924    | chromosome 14 open reading frame 119                              | 0 | 0 | 0 | 0 | 1 | 0 | 1 | 0 | hsa-miR-1908 | -0.25 | N/A | Sites in UTR |
| CPNE5     | NM_020939    | copine V                                                          | 0 | 0 | 0 | 0 | 1 | 0 | 1 | 0 | hsa-miR-663  | -0.25 | N/A | Sites in UTR |
| OTUD6A    | NM_207320    | OTU domain containing 6A                                          | 0 | 0 | 0 | 0 | 1 | 0 | 1 | 0 | hsa-miR-663  | -0.25 | N/A | Sites in UTR |
| MTR       | NM_000254    | 5-methyltetrahydrofolate-homocysteine methyltransferase           | 0 | 0 | 0 | 0 | 2 | 0 | 1 | 1 | hsa-miR-1908 | -0.25 | N/A | Sites in UTR |
| EPHB3     | NM_004443    | EPH receptor B3                                                   | 1 | 0 | 1 | 0 | 0 | 0 | 0 | 0 | hsa-miR-663  | -0.25 | N/A | Sites in UTR |
| MN1       | NM_002430    | meningioma (disrupted in balanced translocation) 1                | 0 | 0 | 0 | 0 | 1 | 0 | 1 | 0 | hsa-miR-663  | -0.25 | N/A | Sites in UTR |
| PDCD1     | NM_005018    | programmed cell death 1                                           | 0 | 0 | 0 | 0 | 1 | 0 | 1 | 0 | hsa-miR-663  | -0.25 | N/A | Sites in UTR |

|         |              |                                                                 |   |   |   |   |   |   |   |   |              |       |     |              |
|---------|--------------|-----------------------------------------------------------------|---|---|---|---|---|---|---|---|--------------|-------|-----|--------------|
| NPLOC4  | NM_017921    | nuclear protein localization 4 homolog ( <i>S. cerevisiae</i> ) | 0 | 0 | 0 | 0 | 1 | 0 | 1 | 0 | hsa-miR-1908 | -0.25 | N/A | Sites in UTR |
| HR      | NM_005144    | hairless homolog (mouse)                                        | 0 | 0 | 0 | 0 | 1 | 0 | 1 | 0 | hsa-miR-1908 | -0.25 | N/A | Sites in UTR |
| LPCAT1  | NM_024830    | lysophosphatidylcholine acyltransferase 1                       | 0 | 0 | 0 | 0 | 1 | 0 | 1 | 0 | hsa-miR-663  | -0.25 | N/A | Sites in UTR |
| ZNF696  | NM_030895    | zinc finger protein 696                                         | 0 | 0 | 0 | 0 | 1 | 0 | 1 | 0 | hsa-miR-663  | -0.25 | N/A | Sites in UTR |
| SH3TC2  | NM_024577    | SH3 domain and tetratricopeptide repeats 2                      | 0 | 0 | 0 | 0 | 1 | 0 | 0 | 1 | hsa-miR-1908 | -0.24 | N/A | Sites in UTR |
| FAM89A  | NM_198552    | family with sequence similarity 89, member A                    | 0 | 0 | 0 | 0 | 1 | 0 | 0 | 1 | hsa-miR-663  | -0.24 | N/A | Sites in UTR |
| KCNJ11  | NM_000525    | potassium inwardly-rectifying channel, subfamily J, member 11   | 0 | 0 | 0 | 0 | 1 | 0 | 1 | 0 | hsa-miR-663  | -0.24 | N/A | Sites in UTR |
| IL32    | NM_001012631 | interleukin 32                                                  | 0 | 0 | 0 | 0 | 1 | 0 | 1 | 0 | hsa-miR-1908 | -0.24 | N/A | Sites in UTR |
| HHLA3   | NM_001031693 | HERV-H LTR-associating 3                                        | 0 | 0 | 0 | 0 | 1 | 0 | 1 | 0 | hsa-miR-663  | -0.24 | N/A | Sites in UTR |
| ZBTB4   | NM_001128833 | zinc finger and BTB domain containing 4                         | 0 | 0 | 0 | 0 | 1 | 0 | 1 | 0 | hsa-miR-1908 | -0.24 | N/A | Sites in UTR |
| VSTM2L  | NM_080607    | V-set and transmembrane domain containing 2 like                | 0 | 0 | 0 | 0 | 1 | 0 | 1 | 0 | hsa-miR-663  | -0.24 | N/A | Sites in UTR |
| IGFBP6  | NM_002178    | insulin-like growth factor binding protein 6                    | 0 | 0 | 0 | 0 | 1 | 0 | 1 | 0 | hsa-miR-1908 | -0.24 | N/A | Sites in UTR |
| SFRP5   | NM_003015    | secreted frizzled-related protein 5                             | 0 | 0 | 0 | 0 | 1 | 0 | 1 | 0 | hsa-miR-663  | -0.24 | N/A | Sites in UTR |
| MACROD1 | NM_014067    | MACRO domain containing 1                                       | 0 | 0 | 0 | 0 | 1 | 0 | 1 | 0 | hsa-miR-663  | -0.24 | N/A | Sites in UTR |
| RTBDN   | NM_001080997 | retbindin                                                       | 0 | 0 | 0 | 0 | 1 | 0 | 1 | 0 | hsa-miR-663  | -0.24 | N/A | Sites in UTR |
| MAMDC4  | NM_206920    | MAM domain containing 4                                         | 0 | 0 | 0 | 0 | 1 | 0 | 1 | 0 | hsa-miR-663  | -0.24 | N/A | Sites in UTR |
| GP5     | NM_004488    | glycoprotein V (platelet)                                       | 0 | 0 | 0 | 0 | 1 | 0 | 1 | 0 | hsa-miR-1908 | -0.24 | N/A | Sites in UTR |
| PVRL2   | NM_002856    | poliovirus receptor-related 2 (herpesvirus entry mediator B)    | 0 | 0 | 0 | 0 | 1 | 0 | 1 | 0 | hsa-miR-663  | -0.24 | N/A | Sites in UTR |
| RAB35   | NM_001167606 | RAB35, member RAS oncogene family                               | 0 | 0 | 0 | 0 | 1 | 0 | 1 | 0 | hsa-miR-1908 | -0.24 | N/A | Sites in UTR |
| CALY    | NM_015722    | calcyon neuron-specific vesicular protein                       | 0 | 0 | 0 | 0 | 1 | 0 | 1 | 0 | hsa-miR-1908 | -0.24 | N/A | Sites in UTR |

|          |              |                                                                                         |   |   |   |   |   |   |   |   |              |       |     |              |
|----------|--------------|-----------------------------------------------------------------------------------------|---|---|---|---|---|---|---|---|--------------|-------|-----|--------------|
| MKL1     | NM_020831    | megakaryoblastic leukemia (translocation) 1                                             | 0 | 0 | 0 | 0 | 1 | 0 | 1 | 0 | hsa-miR-1908 | -0.24 | N/A | Sites in UTR |
| UNKL     | NM_001193388 | unkempt homolog (Drosophila)-like                                                       | 0 | 0 | 0 | 0 | 1 | 0 | 1 | 0 | hsa-miR-663  | -0.24 | N/A | Sites in UTR |
| PPDPF    | NM_024299    | pancreatic progenitor cell differentiation and proliferation factor homolog (zebrafish) | 0 | 0 | 0 | 0 | 1 | 0 | 1 | 0 | hsa-miR-1908 | -0.24 | N/A | Sites in UTR |
| KLK9     | NM_012315    | kallikrein-related peptidase 9                                                          | 0 | 0 | 0 | 0 | 1 | 0 | 1 | 0 | hsa-miR-663  | -0.24 | N/A | Sites in UTR |
| TNRC6B   | NM_001024843 | trinucleotide repeat containing 6B                                                      | 0 | 0 | 0 | 0 | 1 | 1 | 0 | 0 | hsa-miR-1908 | -0.24 | N/A | Sites in UTR |
| CDH8     | NM_001796    | cadherin 8, type 2                                                                      | 0 | 0 | 0 | 0 | 1 | 0 | 0 | 1 | hsa-miR-1908 | -0.24 | N/A | Sites in UTR |
| SFN      | NM_006142    | stratifin                                                                               | 0 | 0 | 0 | 0 | 2 | 0 | 1 | 1 | hsa-miR-663  | -0.24 | N/A | Sites in UTR |
| SYN2     | NM_133625    | synapsin II                                                                             | 0 | 0 | 0 | 0 | 1 | 0 | 1 | 0 | hsa-miR-663  | -0.24 | N/A | Sites in UTR |
| HSPB7    | NM_014424    | heat shock 27kDa protein family, member 7 (cardiovascular)                              | 0 | 0 | 0 | 0 | 1 | 0 | 1 | 0 | hsa-miR-663  | -0.24 | N/A | Sites in UTR |
| ZNF671   | NM_024833    | zinc finger protein 671                                                                 | 0 | 0 | 0 | 0 | 1 | 0 | 0 | 1 | hsa-miR-1908 | -0.24 | N/A | Sites in UTR |
| KCNC3    | NM_004977    | potassium voltage-gated channel, Shaw-related subfamily, member 3                       | 0 | 0 | 0 | 0 | 1 | 0 | 1 | 0 | hsa-miR-1908 | -0.24 | N/A | Sites in UTR |
| STAM     | NM_003473    | signal transducing adaptor molecule (SH3 domain and ITAM motif) 1                       | 0 | 0 | 0 | 0 | 1 | 0 | 1 | 0 | hsa-miR-1908 | -0.24 | N/A | Sites in UTR |
| MCOLN1   | NM_020533    | mucolipin 1                                                                             | 0 | 0 | 0 | 0 | 1 | 0 | 1 | 0 | hsa-miR-663  | -0.24 | N/A | Sites in UTR |
| NDOR1    | NM_001144026 | NADPH dependent diflavin oxidoreductase 1                                               | 0 | 0 | 0 | 0 | 2 | 0 | 2 | 0 | hsa-miR-663  | -0.24 | N/A | Sites in UTR |
| PXMP4    | NM_007238    | peroxisomal membrane protein 4, 24kDa                                                   | 0 | 0 | 0 | 0 | 2 | 0 | 0 | 2 | hsa-miR-663  | -0.24 | N/A | Sites in UTR |
| CD5L     | NM_005894    | CD5 molecule-like                                                                       | 0 | 0 | 0 | 0 | 1 | 0 | 1 | 0 | hsa-miR-663  | -0.24 | N/A | Sites in UTR |
| INPPL1   | NM_001567    | inositol polyphosphate phosphatase-like 1                                               | 0 | 0 | 0 | 0 | 1 | 0 | 1 | 0 | hsa-miR-663  | -0.24 | N/A | Sites in UTR |
| C1orf93  | NM_001195736 | chromosome 1 open reading frame 93                                                      | 0 | 0 | 0 | 0 | 1 | 0 | 1 | 0 | hsa-miR-1908 | -0.24 | N/A | Sites in UTR |
| C7orf51  | NM_173564    | chromosome 7 open reading frame 51                                                      | 0 | 0 | 0 | 0 | 1 | 0 | 1 | 0 | hsa-miR-1908 | -0.24 | N/A | Sites in UTR |
| KIAA0040 | NM_001162893 | KIAA0040                                                                                | 0 | 0 | 0 | 0 | 1 | 1 | 0 | 0 | hsa-miR-663  | -0.24 | N/A | Sites in UTR |

|           |              |                                                                            |   |   |   |   |   |   |   |   |              |       |     |              |
|-----------|--------------|----------------------------------------------------------------------------|---|---|---|---|---|---|---|---|--------------|-------|-----|--------------|
| ACCN1     | NM_001094    | amiloride-sensitive cation channel 1, neuronal                             | 0 | 0 | 0 | 0 | 1 | 0 | 1 | 0 | hsa-miR-1908 | -0.24 | N/A | Sites in UTR |
| LCN1      | NM_002297    | lipocalin 1 (tear prealbumin)                                              | 0 | 0 | 0 | 0 | 1 | 0 | 1 | 0 | hsa-miR-663  | -0.24 | N/A | Sites in UTR |
| MYOD1     | NM_002478    | myogenic differentiation 1                                                 | 0 | 0 | 0 | 0 | 1 | 0 | 1 | 0 | hsa-miR-663  | -0.24 | N/A | Sites in UTR |
| SLC6A8    | NM_001142805 | solute carrier family 6 (neurotransmitter transporter, creatine), member 8 | 0 | 0 | 0 | 0 | 1 | 0 | 1 | 0 | hsa-miR-663  | -0.24 | N/A | Sites in UTR |
| CLDN6     | NM_021195    | claudin 6                                                                  | 0 | 0 | 0 | 0 | 1 | 0 | 1 | 0 | hsa-miR-1908 | -0.24 | N/A | Sites in UTR |
| LHPP      | NM_001167880 | phospholysine phosphohistidine inorganic pyrophosphate phosphatase         | 0 | 0 | 0 | 0 | 1 | 0 | 1 | 0 | hsa-miR-663  | -0.24 | N/A | Sites in UTR |
| ZFH2      | NM_033400    | zinc finger homeobox 2                                                     | 0 | 0 | 0 | 0 | 1 | 0 | 1 | 0 | hsa-miR-663  | -0.24 | N/A | Sites in UTR |
| DCAF15    | NM_138353    | DDB1 and CUL4 associated factor 15                                         | 0 | 0 | 0 | 0 | 1 | 0 | 1 | 0 | hsa-miR-1908 | -0.24 | N/A | Sites in UTR |
| SPTBN2    | NM_006946    | spectrin, beta, non-erythrocytic 2                                         | 0 | 0 | 0 | 0 | 1 | 0 | 1 | 0 | hsa-miR-663  | -0.24 | N/A | Sites in UTR |
| TATDN2    | NM_014760    | TatD DNase domain containing 2                                             | 0 | 0 | 0 | 0 | 1 | 0 | 1 | 0 | hsa-miR-663  | -0.24 | N/A | Sites in UTR |
| PRX       | NM_020956    | periaxin                                                                   | 0 | 0 | 0 | 0 | 2 | 1 | 1 | 0 | hsa-miR-663  | -0.24 | N/A | Sites in UTR |
| KREMEN1   | NM_001039570 | kringle containing transmembrane protein 1                                 | 0 | 0 | 0 | 0 | 1 | 0 | 1 | 0 | hsa-miR-1908 | -0.24 | N/A | Sites in UTR |
| LRRC33    | NM_198565    | leucine rich repeat containing 33                                          | 0 | 0 | 0 | 0 | 1 | 0 | 1 | 0 | hsa-miR-1908 | -0.24 | N/A | Sites in UTR |
| C9orf171  | NM_207417    | chromosome 9 open reading frame 171                                        | 0 | 0 | 0 | 0 | 1 | 0 | 1 | 0 | hsa-miR-1908 | -0.24 | N/A | Sites in UTR |
| MPRIIP    | NM_015134    | myosin phosphatase Rho interacting protein                                 | 0 | 0 | 0 | 0 | 2 | 0 | 1 | 1 | hsa-miR-663  | -0.24 | N/A | Sites in UTR |
| PCGF3     | NM_006315    | polycomb group ring finger 3                                               | 0 | 0 | 0 | 0 | 1 | 0 | 1 | 0 | hsa-miR-1908 | -0.24 | N/A | Sites in UTR |
| TNFAIP8L1 | NM_001167942 | tumor necrosis factor, alpha-induced protein 8-like 1                      | 0 | 0 | 0 | 0 | 1 | 0 | 1 | 0 | hsa-miR-1908 | -0.24 | N/A | Sites in UTR |
| DPY19L3   | NM_001172774 | dpy-19-like 3 (C. elegans)                                                 | 0 | 0 | 0 | 0 | 1 | 1 | 0 | 0 | hsa-miR-663  | -0.24 | N/A | Sites in UTR |
| RAPGEFL1  | NM_016339    | Rap guanine nucleotide exchange factor (GEF)-like 1                        | 0 | 0 | 0 | 0 | 1 | 0 | 0 | 1 | hsa-miR-1908 | -0.24 | N/A | Sites in UTR |
| RPL28     | NM_000991    | ribosomal protein L28                                                      | 0 | 0 | 0 | 0 | 1 | 0 | 1 | 0 | hsa-miR-663  | -0.24 | N/A | Sites in UTR |

|         |              |                                                                             |   |   |   |   |   |   |   |   |              |       |     |              |
|---------|--------------|-----------------------------------------------------------------------------|---|---|---|---|---|---|---|---|--------------|-------|-----|--------------|
| STXBP1  | NM_001032221 | syntaxin binding protein 1                                                  | 0 | 0 | 0 | 0 | 1 | 0 | 1 | 0 | hsa-miR-1908 | -0.24 | N/A | Sites in UTR |
| PDCD11  | NM_014976    | programmed cell death 11                                                    | 0 | 0 | 0 | 0 | 1 | 0 | 1 | 0 | hsa-miR-663  | -0.24 | N/A | Sites in UTR |
| DHX37   | NM_032656    | DEAH (Asp-Glu-Ala-His) box polypeptide 37                                   | 0 | 0 | 0 | 0 | 1 | 0 | 1 | 0 | hsa-miR-663  | -0.24 | N/A | Sites in UTR |
| MAPK15  | NM_139021    | mitogen-activated protein kinase 15                                         | 0 | 0 | 0 | 0 | 1 | 0 | 1 | 0 | hsa-miR-1908 | -0.24 | N/A | Sites in UTR |
| DIS3    | NM_001128226 | DIS3 mitotic control homolog ( <i>S. cerevisiae</i> )                       | 0 | 0 | 0 | 0 | 1 | 1 | 0 | 0 | hsa-miR-663  | -0.24 | N/A | Sites in UTR |
| GBP4    | NM_052941    | guanylate binding protein 4                                                 | 0 | 0 | 0 | 0 | 1 | 0 | 0 | 1 | hsa-miR-663  | -0.23 | N/A | Sites in UTR |
| GPC1    | NM_002081    | glypican 1                                                                  | 0 | 0 | 0 | 0 | 1 | 0 | 1 | 0 | hsa-miR-663  | -0.23 | N/A | Sites in UTR |
| NPTX2   | NM_002523    | neuronal pentraxin II                                                       | 0 | 0 | 0 | 0 | 1 | 0 | 1 | 0 | hsa-miR-663  | -0.23 | N/A | Sites in UTR |
| TCEB3   | NM_003198    | transcription elongation factor B (SIII), polypeptide 3 (110kDa, elongin A) | 0 | 0 | 0 | 0 | 1 | 0 | 1 | 0 | hsa-miR-1908 | -0.23 | N/A | Sites in UTR |
| TNRC6A  | NM_014494    | trinucleotide repeat containing 6A                                          | 0 | 0 | 0 | 0 | 1 | 0 | 1 | 0 | hsa-miR-1908 | -0.23 | N/A | Sites in UTR |
| CCDC106 | NM_013301    | coiled-coil domain containing 106                                           | 0 | 0 | 0 | 0 | 1 | 0 | 1 | 0 | hsa-miR-663  | -0.23 | N/A | Sites in UTR |
| CD1A    | NM_001763    | CD1a molecule                                                               | 0 | 0 | 0 | 0 | 1 | 0 | 0 | 1 | hsa-miR-1908 | -0.23 | N/A | Sites in UTR |
| CHST15  | NM_015892    | carbohydrate (N-acetylglactosamine 4-sulfate 6-O) sulfotransferase 15       | 0 | 0 | 0 | 0 | 1 | 0 | 0 | 1 | hsa-miR-1908 | -0.23 | N/A | Sites in UTR |
| SFTPB   | NM_000542    | surfactant protein B                                                        | 0 | 0 | 0 | 0 | 1 | 0 | 1 | 0 | hsa-miR-663  | -0.23 | N/A | Sites in UTR |
| ULK1    | NM_003565    | unc-51-like kinase 1 ( <i>C. elegans</i> )                                  | 0 | 0 | 0 | 0 | 1 | 0 | 1 | 0 | hsa-miR-663  | -0.23 | N/A | Sites in UTR |
| DGKE    | NM_003647    | diacylglycerol kinase, epsilon 64kDa                                        | 0 | 0 | 0 | 0 | 1 | 0 | 1 | 0 | hsa-miR-1908 | -0.23 | N/A | Sites in UTR |
| TLR6    | NM_006068    | toll-like receptor 6                                                        | 0 | 0 | 0 | 0 | 1 | 0 | 1 | 0 | hsa-miR-663  | -0.23 | N/A | Sites in UTR |
| NGB     | NM_021257    | neuroglobin                                                                 | 0 | 0 | 0 | 0 | 2 | 0 | 2 | 0 | hsa-miR-663  | -0.23 | N/A | Sites in UTR |
| CACNG7  | NM_031896    | calcium channel, voltage-dependent, gamma subunit 7                         | 0 | 0 | 0 | 0 | 1 | 0 | 1 | 0 | hsa-miR-663  | -0.23 | N/A | Sites in UTR |
| FAM55C  | NM_001134456 | family with sequence similarity 55, member C                                | 1 | 0 | 1 | 0 | 0 | 0 | 0 | 0 | hsa-miR-663  | -0.23 | N/A | Sites in UTR |



|          |              |                                                                                           |   |   |   |   |   |   |   |   |              |       |     |              |
|----------|--------------|-------------------------------------------------------------------------------------------|---|---|---|---|---|---|---|---|--------------|-------|-----|--------------|
| EVI5L    | NM_001159944 | ecotropic viral integration site 5-like                                                   | 0 | 0 | 0 | 0 | 1 | 0 | 0 | 1 | hsa-miR-663  | -0.23 | N/A | Sites in UTR |
| NONO     | NM_001145408 | non-POU domain containing, octamer-binding                                                | 0 | 0 | 0 | 0 | 1 | 0 | 1 | 0 | hsa-miR-1908 | -0.23 | N/A | Sites in UTR |
| ZNF70    | NM_021916    | zinc finger protein 70                                                                    | 0 | 0 | 0 | 0 | 1 | 0 | 1 | 0 | hsa-miR-1908 | -0.23 | N/A | Sites in UTR |
| TSPYL4   | NM_021648    | TSPY-like 4                                                                               | 0 | 0 | 0 | 0 | 1 | 0 | 1 | 0 | hsa-miR-1908 | -0.23 | N/A | Sites in UTR |
| PTCHD2   | NM_020780    | patched domain containing 2                                                               | 0 | 0 | 0 | 0 | 1 | 0 | 1 | 0 | hsa-miR-663  | -0.23 | N/A | Sites in UTR |
| C11orf95 | NM_001144936 | chromosome 11 open reading frame 95                                                       | 0 | 0 | 0 | 0 | 1 | 0 | 1 | 0 | hsa-miR-1908 | -0.23 | N/A | Sites in UTR |
| MARVELD1 | NM_031484    | MARVEL domain containing 1                                                                | 0 | 0 | 0 | 0 | 1 | 0 | 1 | 0 | hsa-miR-1908 | -0.23 | N/A | Sites in UTR |
| RLIM     | NM_016120    | ring finger protein, LIM domain interacting                                               | 0 | 0 | 0 | 0 | 2 | 0 | 1 | 1 | hsa-miR-1908 | -0.23 | N/A | Sites in UTR |
| ZNF585B  | NM_152279    | zinc finger protein 585B                                                                  | 0 | 0 | 0 | 0 | 1 | 1 | 0 | 0 | hsa-miR-1908 | -0.23 | N/A | Sites in UTR |
| SLC24A4  | NM_153646    | solute carrier family 24 (sodium/potassium/calcium exchanger), member 4                   | 0 | 0 | 0 | 0 | 1 | 1 | 0 | 0 | hsa-miR-663  | -0.23 | N/A | Sites in UTR |
| TRIM9    | NM_052978    | tripartite motif containing 9                                                             | 0 | 0 | 0 | 0 | 1 | 0 | 0 | 1 | hsa-miR-1908 | -0.23 | N/A | Sites in UTR |
| KCTD19   | NM_001100915 | potassium channel tetramerisation domain containing 19                                    | 0 | 0 | 0 | 0 | 1 | 0 | 0 | 1 | hsa-miR-1908 | -0.23 | N/A | Sites in UTR |
| MYBPHL   | NM_001010985 | myosin binding protein H-like                                                             | 0 | 0 | 0 | 0 | 1 | 0 | 0 | 1 | hsa-miR-1908 | -0.23 | N/A | Sites in UTR |
| GSK3A    | NM_019884    | glycogen synthase kinase 3 alpha                                                          | 0 | 0 | 0 | 0 | 1 | 0 | 1 | 0 | hsa-miR-1908 | -0.23 | N/A | Sites in UTR |
| MPZ      | NM_000530    | myelin protein zero                                                                       | 0 | 0 | 0 | 0 | 1 | 0 | 1 | 0 | hsa-miR-663  | -0.23 | N/A | Sites in UTR |
| PRODH    | NM_001195226 | proline dehydrogenase (oxidase) 1                                                         | 0 | 0 | 0 | 0 | 2 | 0 | 1 | 1 | hsa-miR-663  | -0.23 | N/A | Sites in UTR |
| REEP2    | NM_016606    | receptor accessory protein 2                                                              | 0 | 0 | 0 | 0 | 1 | 0 | 1 | 0 | hsa-miR-663  | -0.23 | N/A | Sites in UTR |
| RAPGEF5  | NM_012294    | Rap guanine nucleotide exchange factor (GEF) 5                                            | 0 | 0 | 0 | 0 | 1 | 0 | 0 | 1 | hsa-miR-1908 | -0.23 | N/A | Sites in UTR |
| HMGGA1   | NM_002131    | high mobility group AT-hook 1                                                             | 0 | 0 | 0 | 0 | 1 | 0 | 1 | 0 | hsa-miR-663  | -0.23 | N/A | Sites in UTR |
| KCNN1    | NM_002248    | potassium intermediate/small conductance calcium-activated channel, subfamily N, member 1 | 0 | 0 | 0 | 0 | 2 | 0 | 1 | 1 | hsa-miR-1908 | -0.23 | N/A | Sites in UTR |

|          |              |                                                                          |   |   |   |   |   |   |   |   |              |       |     |              |
|----------|--------------|--------------------------------------------------------------------------|---|---|---|---|---|---|---|---|--------------|-------|-----|--------------|
| NFIA     | NM_001134673 | nuclear factor I/A                                                       | 0 | 0 | 0 | 0 | 1 | 0 | 1 | 0 | hsa-miR-1908 | -0.23 | N/A | Sites in UTR |
| ENPP1    | NM_006208    | ectonucleotide pyrophosphatase/phosphodiesterase 1                       | 0 | 0 | 0 | 0 | 1 | 0 | 1 | 0 | hsa-miR-1908 | -0.23 | N/A | Sites in UTR |
| SPOCK2   | NM_014767    | sparc/osteonectin, cwcv and kazal-like domains proteoglycan (testican) 2 | 0 | 0 | 0 | 0 | 1 | 0 | 1 | 0 | hsa-miR-663  | -0.23 | N/A | Sites in UTR |
| MMRN1    | NM_007351    | multimerin 1                                                             | 0 | 0 | 0 | 0 | 1 | 0 | 1 | 0 | hsa-miR-663  | -0.23 | N/A | Sites in UTR |
| PHLDB3   | NM_198850    | pleckstrin homology-like domain, family B, member 3                      | 1 | 0 | 1 | 0 | 1 | 0 | 1 | 0 | hsa-miR-1908 | -0.23 | N/A | Sites in UTR |
| CERS2    | NM_022075    | ceramide synthase 2                                                      | 0 | 0 | 0 | 0 | 1 | 0 | 0 | 1 | hsa-miR-1908 | -0.23 | N/A | Sites in UTR |
| HUS1     | NM_004507    | HUS1 checkpoint homolog (S. pombe)                                       | 0 | 0 | 0 | 0 | 1 | 0 | 1 | 0 | hsa-miR-1908 | -0.23 | N/A | Sites in UTR |
| PTBP1    | NM_002819    | polypyrimidine tract binding protein 1                                   | 0 | 0 | 0 | 0 | 1 | 0 | 1 | 0 | hsa-miR-663  | -0.23 | N/A | Sites in UTR |
| ADAMTSL2 | NM_001145320 | ADAMTS-like 2                                                            | 0 | 0 | 0 | 0 | 1 | 0 | 1 | 0 | hsa-miR-1908 | -0.23 | N/A | Sites in UTR |
| ZDHHC12  | NM_032799    | zinc finger, DHHC-type containing 12                                     | 0 | 0 | 0 | 0 | 1 | 0 | 1 | 0 | hsa-miR-663  | -0.23 | N/A | Sites in UTR |
| FAM199X  | NM_207318    | family with sequence similarity 199, X-linked                            | 0 | 0 | 0 | 0 | 1 | 0 | 1 | 0 | hsa-miR-1908 | -0.23 | N/A | Sites in UTR |
| VSTM4    | NM_144984    | V-set and transmembrane domain containing 4                              | 0 | 0 | 0 | 0 | 1 | 0 | 0 | 1 | hsa-miR-1908 | -0.23 | N/A | Sites in UTR |
| BBC3     | NM_001127240 | BCL2 binding component 3                                                 | 0 | 0 | 0 | 0 | 1 | 0 | 1 | 0 | hsa-miR-663  | -0.23 | N/A | Sites in UTR |
| PAK6     | NM_001128628 | p21 protein (Cdc42/Rac)-activated kinase 6                               | 0 | 0 | 0 | 0 | 1 | 0 | 1 | 0 | hsa-miR-1908 | -0.23 | N/A | Sites in UTR |
| PRDM8    | NM_001099403 | PR domain containing 8                                                   | 0 | 0 | 0 | 0 | 1 | 0 | 1 | 0 | hsa-miR-663  | -0.23 | N/A | Sites in UTR |
| PLSCR3   | NM_001201576 | phospholipid scramblase 3                                                | 0 | 0 | 0 | 0 | 1 | 0 | 1 | 0 | hsa-miR-663  | -0.23 | N/A | Sites in UTR |
| TRMT2B   | NM_001167970 | TRM2 tRNA methyltransferase 2 homolog B (S. cerevisiae)                  | 0 | 0 | 0 | 0 | 1 | 0 | 1 | 0 | hsa-miR-663  | -0.23 | N/A | Sites in UTR |
| MSRA     | NM_001135670 | methionine sulfoxide reductase A                                         | 0 | 0 | 0 | 0 | 1 | 0 | 0 | 1 | hsa-miR-1908 | -0.23 | N/A | Sites in UTR |
| PTPN9    | NM_002833    | protein tyrosine phosphatase, non-receptor type 9                        | 0 | 0 | 0 | 0 | 1 | 0 | 0 | 1 | hsa-miR-1908 | -0.23 | N/A | Sites in UTR |
| TBX3     | NM_005996    | T-box 3                                                                  | 0 | 0 | 0 | 0 | 1 | 0 | 0 | 1 | hsa-miR-1908 | -0.23 | N/A | Sites in UTR |

|          |              |                                                               |   |   |   |   |   |   |   |   |              |       |     |              |
|----------|--------------|---------------------------------------------------------------|---|---|---|---|---|---|---|---|--------------|-------|-----|--------------|
| UBE4A    | NM_001204077 | ubiquitination factor E4A                                     | 0 | 0 | 0 | 0 | 1 | 0 | 0 | 1 | hsa-miR-1908 | -0.23 | N/A | Sites in UTR |
| FRMD1    | NM_001122841 | FERM domain containing 1                                      | 0 | 0 | 0 | 0 | 1 | 0 | 0 | 1 | hsa-miR-663  | -0.23 | N/A | Sites in UTR |
| DMWD     | NM_004943    | dystrophia myotonica, WD repeat containing                    | 0 | 0 | 0 | 0 | 1 | 0 | 1 | 0 | hsa-miR-663  | -0.23 | N/A | Sites in UTR |
| RPL29    | NM_000992    | ribosomal protein L29                                         | 0 | 0 | 0 | 0 | 1 | 0 | 1 | 0 | hsa-miR-663  | -0.23 | N/A | Sites in UTR |
| PLXND1   | NM_015103    | plexin D1                                                     | 0 | 0 | 0 | 0 | 1 | 0 | 1 | 0 | hsa-miR-663  | -0.23 | N/A | Sites in UTR |
| PAQR5    | NM_001104554 | progesterone and adipoQ receptor family member V              | 0 | 0 | 0 | 0 | 1 | 0 | 1 | 0 | hsa-miR-663  | -0.23 | N/A | Sites in UTR |
| UBTD1    | NM_024954    | ubiquitin domain containing 1                                 | 0 | 0 | 0 | 0 | 1 | 0 | 1 | 0 | hsa-miR-663  | -0.23 | N/A | Sites in UTR |
| ANKS4B   | NM_145865    | ankyrin repeat and sterile alpha motif domain containing 4B   | 0 | 0 | 0 | 0 | 1 | 0 | 1 | 0 | hsa-miR-663  | -0.23 | N/A | Sites in UTR |
| MARVELD3 | NM_052858    | MARVEL domain containing 3                                    | 0 | 0 | 0 | 0 | 1 | 0 | 0 | 1 | hsa-miR-663  | -0.23 | N/A | Sites in UTR |
| SLC9A3   | NM_004174    | solute carrier family 9 (sodium/hydrogen exchanger), member 3 | 0 | 0 | 0 | 0 | 1 | 0 | 1 | 0 | hsa-miR-663  | -0.23 | N/A | Sites in UTR |
| VASP     | NM_003370    | vasodilator-stimulated phosphoprotein                         | 0 | 0 | 0 | 0 | 1 | 0 | 1 | 0 | hsa-miR-663  | -0.23 | N/A | Sites in UTR |
| C16orf11 | NM_145270    | chromosome 16 open reading frame 11                           | 0 | 0 | 0 | 0 | 1 | 0 | 1 | 0 | hsa-miR-663  | -0.23 | N/A | Sites in UTR |
| C17orf50 | NM_145272    | chromosome 17 open reading frame 50                           | 0 | 0 | 0 | 0 | 1 | 0 | 1 | 0 | hsa-miR-663  | -0.23 | N/A | Sites in UTR |
| NANOS1   | NM_199461    | nanos homolog 1 (Drosophila)                                  | 0 | 0 | 0 | 0 | 1 | 0 | 1 | 0 | hsa-miR-1908 | -0.23 | N/A | Sites in UTR |
| WDR86    | NM_198285    | WD repeat domain 86                                           | 0 | 0 | 0 | 0 | 1 | 0 | 1 | 0 | hsa-miR-663  | -0.23 | N/A | Sites in UTR |
| BMS1     | NM_014753    | BMS1 homolog, ribosome assembly protein (yeast)               | 0 | 0 | 0 | 0 | 1 | 0 | 0 | 1 | hsa-miR-1908 | -0.23 | N/A | Sites in UTR |
| FA2H     | NM_024306    | fatty acid 2-hydroxylase                                      | 0 | 0 | 0 | 0 | 1 | 0 | 0 | 1 | hsa-miR-663  | -0.23 | N/A | Sites in UTR |
| FXN      | NM_000144    | frataxin                                                      | 0 | 0 | 0 | 0 | 1 | 0 | 1 | 0 | hsa-miR-1908 | -0.23 | N/A | Sites in UTR |
| MVK      | NM_000431    | mevalonate kinase                                             | 0 | 0 | 0 | 0 | 1 | 0 | 1 | 0 | hsa-miR-1908 | -0.23 | N/A | Sites in UTR |
| OVOL1    | NM_004561    | ovo-like 1(Drosophila)                                        | 0 | 0 | 0 | 0 | 1 | 0 | 1 | 0 | hsa-miR-1908 | -0.23 | N/A | Sites in UTR |

|          |              |                                                                             |   |   |   |   |   |   |   |   |              |       |     |              |
|----------|--------------|-----------------------------------------------------------------------------|---|---|---|---|---|---|---|---|--------------|-------|-----|--------------|
| CLDN15   | NM_001185080 | claudin 15                                                                  | 0 | 0 | 0 | 0 | 1 | 0 | 1 | 0 | hsa-miR-663  | -0.23 | N/A | Sites in UTR |
| RFT1     | NM_052859    | RFT1 homolog ( <i>S. cerevisiae</i> )                                       | 0 | 0 | 0 | 0 | 1 | 0 | 1 | 0 | hsa-miR-1908 | -0.23 | N/A | Sites in UTR |
| NUDT8    | NM_181843    | nudix (nucleoside diphosphate linked moiety X)-type motif 8                 | 0 | 0 | 0 | 0 | 1 | 0 | 1 | 0 | hsa-miR-663  | -0.23 | N/A | Sites in UTR |
| FAM20A   | NM_017565    | family with sequence similarity 20, member A                                | 0 | 0 | 0 | 0 | 1 | 0 | 0 | 1 | hsa-miR-1908 | -0.23 | N/A | Sites in UTR |
| PHRF1    | NM_020901    | PHD and ring finger domains 1                                               | 0 | 0 | 0 | 0 | 1 | 0 | 0 | 1 | hsa-miR-1908 | -0.23 | N/A | Sites in UTR |
| DYX1C1   | NM_001033560 | dyslexia susceptibility 1 candidate 1                                       | 0 | 0 | 0 | 0 | 1 | 0 | 0 | 1 | hsa-miR-663  | -0.23 | N/A | Sites in UTR |
| MGAT1    | NM_001114617 | mannosyl (alpha-1,3-)-glycoprotein beta-1,2-N-acetylglucosaminyltransferase | 0 | 0 | 0 | 0 | 1 | 0 | 1 | 0 | hsa-miR-663  | -0.23 | N/A | Sites in UTR |
| SOX10    | NM_006941    | SRY (sex determining region Y)-box 10                                       | 0 | 0 | 0 | 0 | 1 | 0 | 1 | 0 | hsa-miR-1908 | -0.23 | N/A | Sites in UTR |
| TBX15    | NM_152380    | T-box 15                                                                    | 0 | 0 | 0 | 0 | 1 | 0 | 1 | 0 | hsa-miR-663  | -0.23 | N/A | Sites in UTR |
| KLF13    | NM_015995    | Kruppel-like factor 13                                                      | 0 | 0 | 0 | 0 | 2 | 0 | 1 | 1 | hsa-miR-1908 | -0.23 | N/A | Sites in UTR |
| EPN3     | NM_017957    | epsin 3                                                                     | 0 | 0 | 0 | 0 | 2 | 0 | 2 | 0 | hsa-miR-663  | -0.23 | N/A | Sites in UTR |
| FAM108A1 | NM_001130111 | family with sequence similarity 108, member A1                              | 0 | 0 | 0 | 0 | 1 | 0 | 1 | 0 | hsa-miR-663  | -0.23 | N/A | Sites in UTR |
| PDE4A    | NM_001111307 | phosphodiesterase 4A, cAMP-specific                                         | 0 | 0 | 0 | 0 | 2 | 0 | 2 | 0 | hsa-miR-663  | -0.23 | N/A | Sites in UTR |
| TRAK2    | NM_015049    | trafficking protein, kinesin binding 2                                      | 0 | 0 | 0 | 0 | 1 | 1 | 0 | 0 | hsa-miR-663  | -0.23 | N/A | Sites in UTR |
| CHMP1A   | NM_001083314 | chromatin modifying protein 1A                                              | 0 | 0 | 0 | 0 | 1 | 0 | 1 | 0 | hsa-miR-663  | -0.22 | N/A | Sites in UTR |
| ZNF687   | NM_020832    | zinc finger protein 687                                                     | 0 | 0 | 0 | 0 | 1 | 0 | 1 | 0 | hsa-miR-663  | -0.22 | N/A | Sites in UTR |
| FAM116B  | NM_001001794 | family with sequence similarity 116, member B                               | 0 | 0 | 0 | 0 | 1 | 0 | 1 | 0 | hsa-miR-1908 | -0.22 | N/A | Sites in UTR |
| C4orf51  | NM_001080531 | chromosome 4 open reading frame 51                                          | 0 | 0 | 0 | 0 | 1 | 0 | 1 | 0 | hsa-miR-663  | -0.22 | N/A | Sites in UTR |
| G6PC     | NM_000151    | glucose-6-phosphatase, catalytic subunit                                    | 0 | 0 | 0 | 0 | 1 | 0 | 0 | 1 | hsa-miR-1908 | -0.22 | N/A | Sites in UTR |
| TRIL     | NM_014817    | TLR4 interactor with leucine-rich repeats                                   | 0 | 0 | 0 | 0 | 1 | 0 | 0 | 1 | hsa-miR-1908 | -0.22 | N/A | Sites in UTR |

|           |              |                                                              |   |   |   |   |   |   |   |   |              |       |     |              |
|-----------|--------------|--------------------------------------------------------------|---|---|---|---|---|---|---|---|--------------|-------|-----|--------------|
| FAM60A    | NM_001135811 | family with sequence similarity 60, member A                 | 0 | 0 | 0 | 0 | 1 | 0 | 0 | 1 | hsa-miR-1908 | -0.22 | N/A | Sites in UTR |
| CACNA1D   | NM_000720    | calcium channel, voltage-dependent, L type, alpha 1D subunit | 0 | 0 | 0 | 0 | 1 | 0 | 1 | 0 | hsa-miR-663  | -0.22 | N/A | Sites in UTR |
| CTF1      | NM_001142544 | cardiotrophin 1                                              | 0 | 0 | 0 | 0 | 1 | 0 | 1 | 0 | hsa-miR-663  | -0.22 | N/A | Sites in UTR |
| HOXB8     | NM_024016    | homeobox B8                                                  | 1 | 0 | 1 | 0 | 0 | 0 | 0 | 0 | hsa-miR-663  | -0.22 | N/A | Sites in UTR |
| UCK2      | NM_012474    | uridine-cytidine kinase 2                                    | 0 | 0 | 0 | 0 | 1 | 0 | 1 | 0 | hsa-miR-1908 | -0.22 | N/A | Sites in UTR |
| RIPK1     | NM_003804    | receptor (TNFRSF)-interacting serine-threonine kinase 1      | 0 | 0 | 0 | 0 | 1 | 0 | 1 | 0 | hsa-miR-663  | -0.22 | N/A | Sites in UTR |
| ERC1      | NM_178039    | ELKS/RAB6-interacting/CAST family member 1                   | 0 | 0 | 0 | 0 | 1 | 0 | 1 | 0 | hsa-miR-663  | -0.22 | N/A | Sites in UTR |
| SYNDIG1L  | NM_001105579 | synapse differentiation inducing 1-like                      | 0 | 0 | 0 | 0 | 1 | 0 | 1 | 0 | hsa-miR-663  | -0.22 | N/A | Sites in UTR |
| NKX2-1    | NM_001079668 | NK2 homeobox 1                                               | 0 | 0 | 0 | 0 | 1 | 0 | 0 | 1 | hsa-miR-663  | -0.22 | N/A | Sites in UTR |
| C9orf89   | NM_032310    | chromosome 9 open reading frame 89                           | 0 | 0 | 0 | 0 | 1 | 0 | 0 | 1 | hsa-miR-1908 | -0.22 | N/A | Sites in UTR |
| CMTM5     | NM_001037288 | CKLF-like MARVEL transmembrane domain containing 5           | 0 | 0 | 0 | 0 | 1 | 0 | 0 | 1 | hsa-miR-1908 | -0.22 | N/A | Sites in UTR |
| C19orf51  | NM_178837    | chromosome 19 open reading frame 51                          | 0 | 0 | 0 | 0 | 1 | 0 | 0 | 1 | hsa-miR-663  | -0.22 | N/A | Sites in UTR |
| SLC6A18   | NM_182632    | solute carrier family 6, member 18                           | 0 | 0 | 0 | 0 | 1 | 0 | 1 | 0 | hsa-miR-663  | -0.22 | N/A | Sites in UTR |
| RNF165    | NM_152470    | ring finger protein 165                                      | 0 | 0 | 0 | 0 | 1 | 0 | 1 | 0 | hsa-miR-663  | -0.22 | N/A | Sites in UTR |
| ZDHHC3    | NM_001135179 | zinc finger, DHHC-type containing 3                          | 0 | 0 | 0 | 0 | 2 | 1 | 1 | 0 | hsa-miR-663  | -0.22 | N/A | Sites in UTR |
| HN1L      | NM_144570    | hematological and neurological expressed 1-like              | 0 | 0 | 0 | 0 | 1 | 0 | 0 | 1 | hsa-miR-1908 | -0.22 | N/A | Sites in UTR |
| C17orf109 | NM_001162995 | chromosome 17 open reading frame 109                         | 0 | 0 | 0 | 0 | 1 | 0 | 0 | 1 | hsa-miR-1908 | -0.22 | N/A | Sites in UTR |
| TAOK2     | NM_004783    | TAO kinase 2                                                 | 0 | 0 | 0 | 0 | 1 | 0 | 1 | 0 | hsa-miR-663  | -0.22 | N/A | Sites in UTR |
| VPS8      | NM_001009921 | vacuolar protein sorting 8 homolog ( <i>S. cerevisiae</i> )  | 0 | 0 | 0 | 0 | 1 | 0 | 1 | 0 | hsa-miR-663  | -0.22 | N/A | Sites in UTR |
| FBXL18    | NM_024963    | F-box and leucine-rich repeat protein 18                     | 0 | 0 | 0 | 0 | 2 | 0 | 1 | 1 | hsa-miR-663  | -0.22 | N/A | Sites in UTR |

|           |              |                                                                                        |   |   |   |   |   |   |   |   |              |       |     |              |
|-----------|--------------|----------------------------------------------------------------------------------------|---|---|---|---|---|---|---|---|--------------|-------|-----|--------------|
| TMEM184A  | NM_001097620 | transmembrane protein 184A                                                             | 0 | 0 | 0 | 0 | 2 | 0 | 0 | 2 | hsa-miR-663  | -0.22 | N/A | Sites in UTR |
| IL17RD    | NM_017563    | interleukin 17 receptor D                                                              | 0 | 0 | 0 | 0 | 1 | 1 | 0 | 0 | hsa-miR-1908 | -0.22 | N/A | Sites in UTR |
| BAD       | NM_004322    | BCL2-associated agonist of cell death                                                  | 0 | 0 | 0 | 0 | 1 | 0 | 1 | 0 | hsa-miR-663  | -0.22 | N/A | Sites in UTR |
| CALB2     | NM_001740    | calbindin 2                                                                            | 0 | 0 | 0 | 0 | 1 | 0 | 1 | 0 | hsa-miR-663  | -0.22 | N/A | Sites in UTR |
| SEMA3F    | NM_004186    | sema domain, immunoglobulin domain (Ig), short basic domain, secreted, (semaphorin) 3F | 0 | 0 | 0 | 0 | 1 | 0 | 1 | 0 | hsa-miR-1908 | -0.22 | N/A | Sites in UTR |
| SLC9A3R2  | NM_001130012 | solute carrier family 9 (sodium/hydrogen exchanger), member 3 regulator 2              | 0 | 0 | 0 | 0 | 1 | 0 | 1 | 0 | hsa-miR-1908 | -0.22 | N/A | Sites in UTR |
| C10orf116 | NM_006829    | chromosome 10 open reading frame 116                                                   | 0 | 0 | 0 | 0 | 1 | 0 | 0 | 1 | hsa-miR-1908 | -0.22 | N/A | Sites in UTR |
| TBX21     | NM_013351    | T-box 21                                                                               | 0 | 0 | 0 | 0 | 1 | 0 | 0 | 1 | hsa-miR-1908 | -0.22 | N/A | Sites in UTR |
| ABLIM1    | NM_001003407 | actin binding LIM protein 1                                                            | 0 | 0 | 0 | 0 | 1 | 0 | 1 | 0 | hsa-miR-1908 | -0.22 | N/A | Sites in UTR |
| BRD3      | NM_007371    | bromodomain containing 3                                                               | 0 | 0 | 0 | 0 | 1 | 0 | 1 | 0 | hsa-miR-663  | -0.22 | N/A | Sites in UTR |
| SASH3     | NM_018990    | SAM and SH3 domain containing 3                                                        | 0 | 0 | 0 | 0 | 1 | 0 | 1 | 0 | hsa-miR-1908 | -0.22 | N/A | Sites in UTR |
| MRM1      | NM_024864    | mitochondrial rRNA methyltransferase 1 homolog (S. cerevisiae)                         | 0 | 0 | 0 | 0 | 1 | 0 | 1 | 0 | hsa-miR-663  | -0.22 | N/A | Sites in UTR |
| CRB2      | NM_173689    | crumbs homolog 2 (Drosophila)                                                          | 0 | 0 | 0 | 0 | 1 | 0 | 1 | 0 | hsa-miR-1908 | -0.22 | N/A | Sites in UTR |
| CDC14B    | NM_001077181 | CDC14 cell division cycle 14 homolog B (S. cerevisiae)                                 | 0 | 0 | 0 | 0 | 1 | 1 | 0 | 0 | hsa-miR-1908 | -0.22 | N/A | Sites in UTR |
| SLC17A9   | NM_022082    | solute carrier family 17, member 9                                                     | 0 | 0 | 0 | 0 | 1 | 0 | 0 | 1 | hsa-miR-663  | -0.22 | N/A | Sites in UTR |
| MRPS26    | NM_030811    | mitochondrial ribosomal protein S26                                                    | 0 | 0 | 0 | 0 | 1 | 0 | 0 | 1 | hsa-miR-1908 | -0.22 | N/A | Sites in UTR |
| NR4A1     | NM_001202233 | nuclear receptor subfamily 4, group A, member 1                                        | 0 | 0 | 0 | 0 | 1 | 0 | 1 | 0 | hsa-miR-1908 | -0.22 | N/A | Sites in UTR |
| GLTSCR1   | NM_015711    | glioma tumor suppressor candidate region gene 1                                        | 0 | 0 | 0 | 0 | 1 | 0 | 1 | 0 | hsa-miR-1908 | -0.22 | N/A | Sites in UTR |
| NSD1      | NM_022455    | nuclear receptor binding SET domain protein 1                                          | 0 | 0 | 0 | 0 | 1 | 0 | 1 | 0 | hsa-miR-663  | -0.22 | N/A | Sites in UTR |
| CCT6A     | NM_001009186 | chaperonin containing TCP1, subunit 6A (zeta 1)                                        | 0 | 0 | 0 | 0 | 1 | 0 | 0 | 1 | hsa-miR-1908 | -0.22 | N/A | Sites in UTR |

|         |              |                                                          |   |   |   |   |   |   |   |   |              |       |     |              |
|---------|--------------|----------------------------------------------------------|---|---|---|---|---|---|---|---|--------------|-------|-----|--------------|
| CACNG2  | NM_006078    | calcium channel, voltage-dependent, gamma subunit 2      | 0 | 0 | 0 | 0 | 1 | 0 | 0 | 1 | hsa-miR-1908 | -0.22 | N/A | Sites in UTR |
| IGFBP2  | NM_000597    | insulin-like growth factor binding protein 2, 36kDa      | 0 | 0 | 0 | 0 | 1 | 0 | 1 | 0 | hsa-miR-663  | -0.22 | N/A | Sites in UTR |
| PIK3C2B | NM_002646    | phosphoinositide-3-kinase, class 2, beta polypeptide     | 0 | 0 | 0 | 0 | 1 | 0 | 1 | 0 | hsa-miR-663  | -0.22 | N/A | Sites in UTR |
| PLEKHO2 | NM_001195059 | pleckstrin homology domain containing, family O member 2 | 0 | 0 | 0 | 0 | 1 | 0 | 1 | 0 | hsa-miR-1908 | -0.22 | N/A | Sites in UTR |
| CPZ     | NM_001014447 | carboxypeptidase Z                                       | 0 | 0 | 0 | 0 | 1 | 0 | 0 | 1 | hsa-miR-663  | -0.21 | N/A | Sites in UTR |
| FAM193A | NM_003704    | family with sequence similarity 193, member A            | 0 | 0 | 0 | 0 | 1 | 0 | 0 | 1 | hsa-miR-1908 | -0.21 | N/A | Sites in UTR |
| TNFSF10 | NM_001190943 | tumor necrosis factor (ligand) superfamily, member 10    | 0 | 0 | 0 | 0 | 1 | 0 | 0 | 1 | hsa-miR-1908 | -0.21 | N/A | Sites in UTR |
| NCF1    | NM_000265    | neutrophil cytosolic factor 1                            | 0 | 0 | 0 | 0 | 1 | 0 | 0 | 1 | hsa-miR-663  | -0.21 | N/A | Sites in UTR |
| RHOB    | NM_004040    | ras homolog gene family, member B                        | 0 | 0 | 0 | 0 | 1 | 0 | 1 | 0 | hsa-miR-1908 | -0.21 | N/A | Sites in UTR |
| 1-Sep   | NM_052838    | septin 1                                                 | 0 | 0 | 0 | 0 | 2 | 0 | 2 | 0 | hsa-miR-663  | -0.21 | N/A | Sites in UTR |
| ILF3    | NM_012218    | interleukin enhancer binding factor 3, 90kDa             | 0 | 0 | 0 | 0 | 1 | 0 | 1 | 0 | hsa-miR-663  | -0.21 | N/A | Sites in UTR |
| BRD2    | NM_001113182 | bromodomain containing 2                                 | 0 | 0 | 0 | 0 | 1 | 0 | 1 | 0 | hsa-miR-1908 | -0.21 | N/A | Sites in UTR |
| DPYSL4  | NM_006426    | dihydropyrimidinase-like 4                               | 0 | 0 | 0 | 0 | 1 | 0 | 1 | 0 | hsa-miR-663  | -0.21 | N/A | Sites in UTR |
| IGF2BP2 | NM_001007225 | insulin-like growth factor 2 mRNA binding protein 2      | 0 | 0 | 0 | 0 | 1 | 0 | 1 | 0 | hsa-miR-663  | -0.21 | N/A | Sites in UTR |
| SEZ6L2  | NM_001114099 | seizure related 6 homolog (mouse)-like 2                 | 0 | 0 | 0 | 0 | 1 | 0 | 1 | 0 | hsa-miR-1908 | -0.21 | N/A | Sites in UTR |
| FBLIM1  | NM_001024216 | filamin binding LIM protein 1                            | 0 | 0 | 0 | 0 | 1 | 0 | 1 | 0 | hsa-miR-1908 | -0.21 | N/A | Sites in UTR |
| CASKIN2 | NM_001142643 | CASK interacting protein 2                               | 0 | 0 | 0 | 0 | 1 | 0 | 1 | 0 | hsa-miR-1908 | -0.21 | N/A | Sites in UTR |
| CACNG8  | NM_031895    | calcium channel, voltage-dependent, gamma subunit 8      | 0 | 0 | 0 | 0 | 1 | 0 | 1 | 0 | hsa-miR-663  | -0.21 | N/A | Sites in UTR |
| CTU1    | NM_145232    | cytosolic thioridylase subunit 1 homolog (S. pombe)      | 0 | 0 | 0 | 0 | 1 | 0 | 1 | 0 | hsa-miR-663  | -0.21 | N/A | Sites in UTR |
| UGGT1   | NM_020120    | UDP-glucose glycoprotein glucosyltransferase 1           | 0 | 0 | 0 | 0 | 2 | 0 | 2 | 0 | hsa-miR-663  | -0.21 | N/A | Sites in UTR |

|           |              |                                                                                 |   |   |   |   |   |   |   |   |              |       |     |              |
|-----------|--------------|---------------------------------------------------------------------------------|---|---|---|---|---|---|---|---|--------------|-------|-----|--------------|
| DUSP7     | NM_001947    | dual specificity phosphatase 7                                                  | 0 | 0 | 0 | 0 | 1 | 0 | 0 | 1 | hsa-miR-1908 | -0.21 | N/A | Sites in UTR |
| SEMA6A    | NM_020796    | sema domain, transmembrane domain (TM), and cytoplasmic domain, (semaphorin) 6A | 0 | 0 | 0 | 0 | 1 | 0 | 0 | 1 | hsa-miR-1908 | -0.21 | N/A | Sites in UTR |
| H2AFX     | NM_002105    | H2A histone family, member X                                                    | 0 | 0 | 0 | 0 | 1 | 0 | 1 | 0 | hsa-miR-1908 | -0.21 | N/A | Sites in UTR |
| TM2D2     | NM_001024380 | TM2 domain containing 2                                                         | 0 | 0 | 0 | 0 | 1 | 0 | 1 | 0 | hsa-miR-663  | -0.21 | N/A | Sites in UTR |
| FAM125B   | NM_033446    | family with sequence similarity 125, member B                                   | 0 | 0 | 0 | 0 | 1 | 0 | 1 | 0 | hsa-miR-663  | -0.21 | N/A | Sites in UTR |
| IER5L     | NM_203434    | immediate early response 5-like                                                 | 0 | 0 | 0 | 0 | 1 | 0 | 1 | 0 | hsa-miR-663  | -0.21 | N/A | Sites in UTR |
| RASGEF1C  | NM_175062    | RasGEF domain family, member 1C                                                 | 0 | 0 | 0 | 0 | 1 | 0 | 0 | 1 | hsa-miR-663  | -0.21 | N/A | Sites in UTR |
| TLN1      | NM_006289    | talin 1                                                                         | 0 | 0 | 0 | 0 | 1 | 0 | 1 | 0 | hsa-miR-1908 | -0.21 | N/A | Sites in UTR |
| CDC123    | NM_006023    | cell division cycle 123 homolog ( <i>S. cerevisiae</i> )                        | 0 | 0 | 0 | 0 | 1 | 0 | 1 | 0 | hsa-miR-1908 | -0.21 | N/A | Sites in UTR |
| NOL10     | NM_024894    | nucleolar protein 10                                                            | 0 | 0 | 0 | 0 | 1 | 0 | 1 | 0 | hsa-miR-663  | -0.21 | N/A | Sites in UTR |
| GLT1D1    | NM_144669    | glycosyltransferase 1 domain containing 1                                       | 0 | 0 | 0 | 0 | 2 | 0 | 2 | 0 | hsa-miR-663  | -0.21 | N/A | Sites in UTR |
| C20orf151 | NM_080833    | chromosome 20 open reading frame 151                                            | 0 | 0 | 0 | 0 | 1 | 0 | 0 | 1 | hsa-miR-663  | -0.21 | N/A | Sites in UTR |
| C1orf144  | NM_001114600 | chromosome 1 open reading frame 144                                             | 0 | 0 | 0 | 0 | 1 | 0 | 1 | 0 | hsa-miR-1908 | -0.21 | N/A | Sites in UTR |
| ANKRD40   | NM_052855    | ankyrin repeat domain 40                                                        | 0 | 0 | 0 | 0 | 1 | 0 | 1 | 0 | hsa-miR-663  | -0.21 | N/A | Sites in UTR |
| MAP3K10   | NM_002446    | mitogen-activated protein kinase kinase kinase 10                               | 0 | 0 | 0 | 0 | 1 | 0 | 0 | 1 | hsa-miR-663  | -0.21 | N/A | Sites in UTR |
| MYO3A     | NM_017433    | myosin IIIA                                                                     | 0 | 0 | 0 | 0 | 1 | 0 | 0 | 1 | hsa-miR-1908 | -0.21 | N/A | Sites in UTR |
| SLC12A7   | NM_006598    | solute carrier family 12 (potassium/chloride transporters), member 7            | 0 | 0 | 0 | 0 | 1 | 0 | 1 | 0 | hsa-miR-1908 | -0.21 | N/A | Sites in UTR |
| CNTNAP2   | NM_014141    | contactin associated protein-like 2                                             | 0 | 0 | 0 | 0 | 2 | 0 | 1 | 1 | hsa-miR-1908 | -0.21 | N/A | Sites in UTR |
| CYBA      | NM_000101    | cytochrome b-245, alpha polypeptide                                             | 0 | 0 | 0 | 0 | 1 | 0 | 0 | 1 | hsa-miR-663  | -0.21 | N/A | Sites in UTR |
| SH3BP4    | NM_014521    | SH3-domain binding protein 4                                                    | 0 | 0 | 0 | 0 | 1 | 0 | 0 | 1 | hsa-miR-1908 | -0.21 | N/A | Sites in UTR |



|         |              |                                                                                        |   |   |   |   |   |   |   |   |              |       |     |              |
|---------|--------------|----------------------------------------------------------------------------------------|---|---|---|---|---|---|---|---|--------------|-------|-----|--------------|
| POLN    | NM_181808    | polymerase (DNA directed) nu                                                           | 0 | 0 | 0 | 0 | 1 | 0 | 0 | 1 | hsa-miR-663  | -0.21 | N/A | Sites in UTR |
| NRTN    | NM_004558    | neurturin                                                                              | 0 | 0 | 0 | 0 | 1 | 0 | 1 | 0 | hsa-miR-663  | -0.21 | N/A | Sites in UTR |
| TBX2    | NM_005994    | T-box 2                                                                                | 0 | 0 | 0 | 0 | 1 | 0 | 1 | 0 | hsa-miR-1908 | -0.21 | N/A | Sites in UTR |
| CTDP1   | NM_001202504 | CTD (carboxy-terminal domain, RNA polymerase II, polypeptide A) phosphatase, subunit 1 | 0 | 0 | 0 | 0 | 1 | 0 | 1 | 0 | hsa-miR-663  | -0.21 | N/A | Sites in UTR |
| MCAT    | NM_014507    | malonyl CoA:ACP acyltransferase (mitochondrial)                                        | 0 | 0 | 0 | 0 | 1 | 0 | 1 | 0 | hsa-miR-1908 | -0.21 | N/A | Sites in UTR |
| CD209   | NM_001144893 | CD209 molecule                                                                         | 0 | 0 | 0 | 0 | 1 | 0 | 1 | 0 | hsa-miR-663  | -0.21 | N/A | Sites in UTR |
| RNPEPL1 | NM_018226    | arginyl aminopeptidase (aminopeptidase B)-like 1                                       | 0 | 0 | 0 | 0 | 1 | 0 | 1 | 0 | hsa-miR-663  | -0.21 | N/A | Sites in UTR |
| ISL2    | NM_145805    | ISL LIM homeobox 2                                                                     | 0 | 0 | 0 | 0 | 1 | 0 | 1 | 0 | hsa-miR-663  | -0.21 | N/A | Sites in UTR |
| ZNF579  | NM_152600    | zinc finger protein 579                                                                | 0 | 0 | 0 | 0 | 1 | 0 | 1 | 0 | hsa-miR-1908 | -0.21 | N/A | Sites in UTR |
| PPP2R5C | NM_001161725 | protein phosphatase 2, regulatory subunit B', gamma                                    | 0 | 0 | 0 | 0 | 1 | 0 | 0 | 1 | hsa-miR-1908 | -0.21 | N/A | Sites in UTR |
| CBX4    | NM_003655    | chromobox homolog 4                                                                    | 0 | 0 | 0 | 0 | 1 | 0 | 0 | 1 | hsa-miR-1908 | -0.21 | N/A | Sites in UTR |
| RBM5    | NM_005778    | RNA binding motif protein 5                                                            | 0 | 0 | 0 | 0 | 1 | 0 | 0 | 1 | hsa-miR-1908 | -0.21 | N/A | Sites in UTR |
| DAPK2   | NM_014326    | death-associated protein kinase 2                                                      | 0 | 0 | 0 | 0 | 1 | 0 | 0 | 1 | hsa-miR-663  | -0.21 | N/A | Sites in UTR |
| DBR1    | NM_016216    | debranching enzyme homolog 1 (S. cerevisiae)                                           | 0 | 0 | 0 | 0 | 1 | 0 | 0 | 1 | hsa-miR-1908 | -0.21 | N/A | Sites in UTR |
| PLAC8   | NM_001130716 | placenta-specific 8                                                                    | 0 | 0 | 0 | 0 | 1 | 0 | 0 | 1 | hsa-miR-1908 | -0.21 | N/A | Sites in UTR |
| CD37    | NM_001040031 | CD37 molecule                                                                          | 0 | 0 | 0 | 0 | 2 | 0 | 2 | 0 | hsa-miR-663  | -0.21 | N/A | Sites in UTR |
| UBE2K   | NM_001111112 | ubiquitin-conjugating enzyme E2K                                                       | 0 | 0 | 0 | 0 | 1 | 0 | 1 | 0 | hsa-miR-663  | -0.21 | N/A | Sites in UTR |
| DCUN1D2 | NM_001014283 | DCN1, defective in cullin neddylation 1, domain containing 2 (S. cerevisiae)           | 0 | 0 | 0 | 0 | 1 | 0 | 1 | 0 | hsa-miR-663  | -0.21 | N/A | Sites in UTR |
| BCORL1  | NM_021946    | BCL6 corepressor-like 1                                                                | 0 | 0 | 0 | 0 | 1 | 0 | 1 | 0 | hsa-miR-663  | -0.21 | N/A | Sites in UTR |
| MGAT5B  | NM_001199172 | mannosyl (alpha-1,6-)-glycoprotein beta-1,6-N-acetylglucosaminyltransferase, isozyme B | 0 | 0 | 0 | 0 | 1 | 0 | 1 | 0 | hsa-miR-663  | -0.21 | N/A | Sites in UTR |

|          |              |                                                          |   |   |   |   |   |   |   |   |              |       |     |              |
|----------|--------------|----------------------------------------------------------|---|---|---|---|---|---|---|---|--------------|-------|-----|--------------|
| HPCA     | NM_002143    | hippocalcin                                              | 0 | 0 | 0 | 0 | 1 | 0 | 0 | 1 | hsa-miR-1908 | -0.21 | N/A | Sites in UTR |
| KIAA1210 | NM_020721    | KIAA1210                                                 | 0 | 0 | 0 | 0 | 1 | 0 | 0 | 1 | hsa-miR-663  | -0.21 | N/A | Sites in UTR |
| GLIS1    | NM_147193    | GLIS family zinc finger 1                                | 0 | 0 | 0 | 0 | 1 | 0 | 0 | 1 | hsa-miR-663  | -0.21 | N/A | Sites in UTR |
| DTX3     | NM_178502    | deltex homolog 3 (Drosophila)                            | 0 | 0 | 0 | 0 | 1 | 0 | 0 | 1 | hsa-miR-663  | -0.21 | N/A | Sites in UTR |
| GFRAL    | NM_207410    | GDNF family receptor alpha like                          | 0 | 0 | 0 | 0 | 1 | 0 | 0 | 1 | hsa-miR-1908 | -0.21 | N/A | Sites in UTR |
| GMDS     | NM_001500    | GDP-mannose 4,6-dehydratase                              | 0 | 0 | 0 | 0 | 1 | 0 | 1 | 0 | hsa-miR-1908 | -0.21 | N/A | Sites in UTR |
| NGFR     | NM_002507    | nerve growth factor receptor                             | 0 | 0 | 0 | 0 | 1 | 0 | 1 | 0 | hsa-miR-663  | -0.21 | N/A | Sites in UTR |
| SLITRK5  | NM_015567    | SLIT and NTRK-like family, member 5                      | 0 | 0 | 0 | 0 | 1 | 0 | 1 | 0 | hsa-miR-663  | -0.21 | N/A | Sites in UTR |
| GIGYF2   | NM_001103146 | GRB10 interacting GYF protein 2                          | 0 | 0 | 0 | 0 | 1 | 0 | 1 | 0 | hsa-miR-663  | -0.21 | N/A | Sites in UTR |
| BLOC1S3  | NM_212550    | biogenesis of lysosomal organelles complex-1, subunit 3  | 0 | 0 | 0 | 0 | 1 | 0 | 1 | 0 | hsa-miR-663  | -0.21 | N/A | Sites in UTR |
| ITGA11   | NM_001004439 | integrin, alpha 11                                       | 0 | 0 | 0 | 0 | 1 | 0 | 0 | 1 | hsa-miR-663  | -0.21 | N/A | Sites in UTR |
| ATP6VOC  | NM_001198569 | ATPase, H+ transporting, lysosomal 16kDa, V0 subunit c   | 0 | 0 | 0 | 0 | 1 | 0 | 1 | 0 | hsa-miR-663  | -0.21 | N/A | Sites in UTR |
| CKM      | NM_001824    | creatine kinase, muscle                                  | 1 | 0 | 1 | 0 | 0 | 0 | 0 | 0 | hsa-miR-1908 | -0.21 | N/A | Sites in UTR |
| ARL4C    | NM_005737    | ADP-ribosylation factor-like 4C                          | 1 | 0 | 1 | 0 | 0 | 0 | 0 | 0 | hsa-miR-1908 | -0.21 | N/A | Sites in UTR |
| ARC      | NM_015193    | activity-regulated cytoskeleton-associated protein       | 0 | 0 | 0 | 0 | 1 | 0 | 1 | 0 | hsa-miR-663  | -0.21 | N/A | Sites in UTR |
| PWWP2A   | NM_052927    | PWWP domain containing 2A                                | 0 | 0 | 0 | 0 | 1 | 0 | 1 | 0 | hsa-miR-663  | -0.21 | N/A | Sites in UTR |
| PIGA     | NM_002641    | phosphatidylinositol glycan anchor biosynthesis, class A | 0 | 0 | 0 | 0 | 1 | 0 | 0 | 1 | hsa-miR-1908 | -0.21 | N/A | Sites in UTR |
| S100B    | NM_006272    | S100 calcium binding protein B                           | 0 | 0 | 0 | 0 | 1 | 0 | 0 | 1 | hsa-miR-663  | -0.21 | N/A | Sites in UTR |
| SLC39A13 | NM_001128225 | solute carrier family 39 (zinc transporter), member 13   | 0 | 0 | 0 | 0 | 1 | 0 | 0 | 1 | hsa-miR-1908 | -0.21 | N/A | Sites in UTR |
| LRRC25   | NM_145256    | leucine rich repeat containing 25                        | 0 | 0 | 0 | 0 | 1 | 0 | 0 | 1 | hsa-miR-1908 | -0.21 | N/A | Sites in UTR |

|          |              |                                                                            |   |   |   |   |   |   |   |   |              |       |     |              |
|----------|--------------|----------------------------------------------------------------------------|---|---|---|---|---|---|---|---|--------------|-------|-----|--------------|
| CCDC140  | NM_153038    | coiled-coil domain containing 140                                          | 0 | 0 | 0 | 0 | 1 | 0 | 0 | 1 | hsa-miR-1908 | -0.21 | N/A | Sites in UTR |
| ATP2B3   | NM_001001344 | ATPase, Ca++ transporting, plasma membrane 3                               | 0 | 0 | 0 | 0 | 1 | 0 | 1 | 0 | hsa-miR-663  | -0.21 | N/A | Sites in UTR |
| DAGLA    | NM_006133    | diacylglycerol lipase, alpha                                               | 0 | 0 | 0 | 0 | 1 | 0 | 1 | 0 | hsa-miR-1908 | -0.21 | N/A | Sites in UTR |
| DDR1     | NM_001202521 | discoidin domain receptor tyrosine kinase 1                                | 0 | 0 | 0 | 0 | 1 | 0 | 1 | 0 | hsa-miR-1908 | -0.21 | N/A | Sites in UTR |
| MAF      | NM_001031804 | v-maf musculoaponeurotic fibrosarcoma oncogene homolog (avian)             | 0 | 0 | 0 | 0 | 1 | 0 | 1 | 0 | hsa-miR-1908 | -0.21 | N/A | Sites in UTR |
| PRKCD    | NM_006254    | protein kinase C, delta                                                    | 0 | 0 | 0 | 0 | 1 | 0 | 1 | 0 | hsa-miR-663  | -0.21 | N/A | Sites in UTR |
| TLK2     | NM_001112707 | tousled-like kinase 2                                                      | 0 | 0 | 0 | 0 | 1 | 0 | 1 | 0 | hsa-miR-1908 | -0.21 | N/A | Sites in UTR |
| FAM19A5  | NM_001082967 | family with sequence similarity 19 (chemokine (C-C motif)-like), member A5 | 0 | 0 | 0 | 0 | 1 | 0 | 1 | 0 | hsa-miR-663  | -0.21 | N/A | Sites in UTR |
| ADCY5    | NM_001199642 | adenylate cyclase 5                                                        | 0 | 0 | 0 | 0 | 1 | 0 | 0 | 1 | hsa-miR-1908 | -0.2  | N/A | Sites in UTR |
| BCAN     | NM_021948    | brevican                                                                   | 0 | 0 | 0 | 0 | 1 | 0 | 0 | 1 | hsa-miR-663  | -0.2  | N/A | Sites in UTR |
| ACAN     | NM_001135    | aggrecan                                                                   | 0 | 0 | 0 | 0 | 1 | 0 | 1 | 0 | hsa-miR-663  | -0.2  | N/A | Sites in UTR |
| GPR44    | NM_004778    | G protein-coupled receptor 44                                              | 0 | 0 | 0 | 0 | 1 | 0 | 1 | 0 | hsa-miR-1908 | -0.2  | N/A | Sites in UTR |
| RELT     | NM_032871    | RELT tumor necrosis factor receptor                                        | 0 | 0 | 0 | 0 | 1 | 0 | 1 | 0 | hsa-miR-663  | -0.2  | N/A | Sites in UTR |
| PIN1     | NM_006221    | peptidylprolyl cis/trans isomerase, NIMA-interacting 1                     | 0 | 0 | 0 | 0 | 1 | 0 | 0 | 1 | hsa-miR-663  | -0.2  | N/A | Sites in UTR |
| CCND1    | NM_053056    | cyclin D1                                                                  | 0 | 0 | 0 | 0 | 1 | 0 | 1 | 0 | hsa-miR-1908 | -0.2  | N/A | Sites in UTR |
| EMP3     | NM_001425    | epithelial membrane protein 3                                              | 0 | 0 | 0 | 0 | 2 | 0 | 2 | 0 | hsa-miR-1908 | -0.2  | N/A | Sites in UTR |
| PYY      | NM_004160    | peptide YY                                                                 | 0 | 0 | 0 | 0 | 1 | 0 | 1 | 0 | hsa-miR-1908 | -0.2  | N/A | Sites in UTR |
| USP5     | NM_001098536 | ubiquitin specific peptidase 5 (isopeptidase T)                            | 0 | 0 | 0 | 0 | 1 | 0 | 1 | 0 | hsa-miR-1908 | -0.2  | N/A | Sites in UTR |
| NRXN3    | NM_001105250 | neurexin 3                                                                 | 0 | 0 | 0 | 0 | 1 | 0 | 1 | 0 | hsa-miR-1908 | -0.2  | N/A | Sites in UTR |
| TBC1D22B | NM_017772    | TBC1 domain family, member 22B                                             | 0 | 0 | 0 | 0 | 1 | 0 | 1 | 0 | hsa-miR-663  | -0.2  | N/A | Sites in UTR |

|          |              |                                                              |   |   |   |   |   |   |   |   |              |      |     |              |
|----------|--------------|--------------------------------------------------------------|---|---|---|---|---|---|---|---|--------------|------|-----|--------------|
| PPM1H    | NM_020700    | protein phosphatase, Mg2+/Mn2+ dependent, 1H                 | 0 | 0 | 0 | 0 | 1 | 0 | 1 | 0 | hsa-miR-663  | -0.2 | N/A | Sites in UTR |
| BAHCC1   | NM_001080519 | BAH domain and coiled-coil containing 1                      | 0 | 0 | 0 | 0 | 1 | 0 | 1 | 0 | hsa-miR-1908 | -0.2 | N/A | Sites in UTR |
| TINAGL1  | NM_001204414 | tubulointerstitial nephritis antigen-like 1                  | 0 | 0 | 0 | 0 | 1 | 0 | 1 | 0 | hsa-miR-663  | -0.2 | N/A | Sites in UTR |
| HTRA3    | NM_053044    | HtrA serine peptidase 3                                      | 0 | 0 | 0 | 0 | 1 | 0 | 1 | 0 | hsa-miR-663  | -0.2 | N/A | Sites in UTR |
| JOSD2    | NM_138334    | Josephin domain containing 2                                 | 0 | 0 | 0 | 0 | 1 | 0 | 1 | 0 | hsa-miR-663  | -0.2 | N/A | Sites in UTR |
| AMOTL1   | NM_130847    | angiominin like 1                                            | 0 | 0 | 0 | 0 | 1 | 0 | 1 | 0 | hsa-miR-1908 | -0.2 | N/A | Sites in UTR |
| MS4A15   | NM_001098835 | membrane-spanning 4-domains, subfamily A, member 15          | 0 | 0 | 0 | 0 | 1 | 0 | 1 | 0 | hsa-miR-663  | -0.2 | N/A | Sites in UTR |
| KLF15    | NM_014079    | Kruppel-like factor 15                                       | 0 | 0 | 0 | 0 | 1 | 0 | 0 | 1 | hsa-miR-663  | -0.2 | N/A | Sites in UTR |
| MPHOSPH8 | NM_017520    | M-phase phosphoprotein 8                                     | 0 | 0 | 0 | 0 | 1 | 0 | 0 | 1 | hsa-miR-1908 | -0.2 | N/A | Sites in UTR |
| UQCC     | NM_001184977 | ubiquinol-cytochrome c reductase complex chaperone           | 0 | 0 | 0 | 0 | 1 | 0 | 0 | 1 | hsa-miR-663  | -0.2 | N/A | Sites in UTR |
| TMPRSS3  | NM_024022    | transmembrane protease, serine 3                             | 0 | 0 | 0 | 0 | 1 | 0 | 0 | 1 | hsa-miR-1908 | -0.2 | N/A | Sites in UTR |
| DNAJB13  | NM_153614    | DnaJ (Hsp40) homolog, subfamily B, member 13                 | 0 | 0 | 0 | 0 | 1 | 0 | 0 | 1 | hsa-miR-663  | -0.2 | N/A | Sites in UTR |
| GRK6     | NM_001004106 | G protein-coupled receptor kinase 6                          | 0 | 0 | 0 | 0 | 1 | 0 | 1 | 0 | hsa-miR-663  | -0.2 | N/A | Sites in UTR |
| TRAF1    | NM_001190945 | TNF receptor-associated factor 1                             | 0 | 0 | 0 | 0 | 1 | 0 | 1 | 0 | hsa-miR-663  | -0.2 | N/A | Sites in UTR |
| KHSRP    | NM_003685    | KH-type splicing regulatory protein                          | 0 | 0 | 0 | 0 | 1 | 0 | 1 | 0 | hsa-miR-663  | -0.2 | N/A | Sites in UTR |
| GRAP     | NM_006613    | GRB2-related adaptor protein                                 | 0 | 0 | 0 | 0 | 1 | 0 | 1 | 0 | hsa-miR-1908 | -0.2 | N/A | Sites in UTR |
| WSCD1    | NM_015253    | WSC domain containing 1                                      | 0 | 0 | 0 | 0 | 1 | 0 | 1 | 0 | hsa-miR-663  | -0.2 | N/A | Sites in UTR |
| MIER1    | NM_001077700 | mesoderm induction early response 1 homolog (Xenopus laevis) | 0 | 0 | 0 | 0 | 1 | 0 | 1 | 0 | hsa-miR-1908 | -0.2 | N/A | Sites in UTR |
| NANOS2   | NM_001029861 | nanos homolog 2 (Drosophila)                                 | 0 | 0 | 0 | 0 | 1 | 0 | 1 | 0 | hsa-miR-1908 | -0.2 | N/A | Sites in UTR |
| SEC13    | NM_001136232 | SEC13 homolog (S. cerevisiae)                                | 0 | 0 | 0 | 0 | 1 | 0 | 0 | 1 | hsa-miR-1908 | -0.2 | N/A | Sites in UTR |

|          |              |                                                                                 |   |   |   |   |   |   |   |   |              |      |     |              |
|----------|--------------|---------------------------------------------------------------------------------|---|---|---|---|---|---|---|---|--------------|------|-----|--------------|
| TERF2    | NM_005652    | telomeric repeat binding factor 2                                               | 0 | 0 | 0 | 0 | 1 | 0 | 0 | 1 | hsa-miR-663  | -0.2 | N/A | Sites in UTR |
| ULK3     | NM_001099436 | unc-51-like kinase 3 (C. elegans)                                               | 0 | 0 | 0 | 0 | 1 | 0 | 0 | 1 | hsa-miR-1908 | -0.2 | N/A | Sites in UTR |
| C19orf28 | NM_174983    | chromosome 19 open reading frame 28                                             | 0 | 0 | 0 | 0 | 1 | 0 | 0 | 1 | hsa-miR-663  | -0.2 | N/A | Sites in UTR |
| B3GNT6   | NM_138706    | UDP-GlcNAc:betaGal beta-1,3-N-acetylglucosaminyltransferase 6 (core 3 synthase) | 0 | 0 | 0 | 0 | 1 | 0 | 0 | 1 | hsa-miR-1908 | -0.2 | N/A | Sites in UTR |
| ACSF3    | NM_174917    | acyl-CoA synthetase family member 3                                             | 0 | 0 | 0 | 0 | 1 | 0 | 0 | 1 | hsa-miR-663  | -0.2 | N/A | Sites in UTR |
| CCPG1    | NM_004748    | cell cycle progression 1                                                        | 0 | 0 | 0 | 0 | 1 | 0 | 1 | 0 | hsa-miR-663  | -0.2 | N/A | Sites in UTR |
| PACS2    | NM_001100913 | phosphofurin acidic cluster sorting protein 2                                   | 0 | 0 | 0 | 0 | 1 | 0 | 1 | 0 | hsa-miR-663  | -0.2 | N/A | Sites in UTR |
| DAGLB    | NM_001142936 | diacylglycerol lipase, beta                                                     | 0 | 0 | 0 | 0 | 1 | 0 | 1 | 0 | hsa-miR-663  | -0.2 | N/A | Sites in UTR |
| ARID3A   | NM_005224    | AT rich interactive domain 3A (BRIGHT-like)                                     | 0 | 0 | 0 | 0 | 1 | 0 | 0 | 1 | hsa-miR-1908 | -0.2 | N/A | Sites in UTR |
| MEFV     | NM_000243    | Mediterranean fever                                                             | 0 | 0 | 0 | 0 | 1 | 0 | 0 | 1 | hsa-miR-1908 | -0.2 | N/A | Sites in UTR |
| XPNPEP2  | NM_003399    | X-prolyl aminopeptidase (aminopeptidase P) 2, membrane-bound                    | 0 | 0 | 0 | 0 | 1 | 0 | 0 | 1 | hsa-miR-1908 | -0.2 | N/A | Sites in UTR |
| DBNDD1   | NM_001042610 | dysbindin (dystrobrevin binding protein 1) domain containing 1                  | 0 | 0 | 0 | 0 | 1 | 0 | 0 | 1 | hsa-miR-663  | -0.2 | N/A | Sites in UTR |
| MEI5     | NM_001002759 | MEI5 meiotic recombination protein homolog (S. cerevisiae)                      | 0 | 0 | 0 | 0 | 1 | 0 | 0 | 1 | hsa-miR-1908 | -0.2 | N/A | Sites in UTR |
| ATP2A2   | NM_170665    | ATPase, Ca++ transporting, cardiac muscle, slow twitch 2                        | 0 | 0 | 0 | 0 | 1 | 0 | 1 | 0 | hsa-miR-663  | -0.2 | N/A | Sites in UTR |
| INSM1    | NM_002196    | insulinoma-associated 1                                                         | 0 | 0 | 0 | 0 | 1 | 0 | 1 | 0 | hsa-miR-1908 | -0.2 | N/A | Sites in UTR |
| MLL2     | NM_003482    | myeloid/lymphoid or mixed-lineage leukemia 2                                    | 0 | 0 | 0 | 0 | 1 | 0 | 1 | 0 | hsa-miR-663  | -0.2 | N/A | Sites in UTR |
| LPIN3    | NM_022896    | lipin 3                                                                         | 0 | 0 | 0 | 0 | 1 | 0 | 1 | 0 | hsa-miR-1908 | -0.2 | N/A | Sites in UTR |
| B3GALT4  | NM_003782    | UDP-Gal:betaGlcNAc beta 1,3-galactosyltransferase, polypeptide 4                | 0 | 0 | 0 | 0 | 1 | 0 | 0 | 1 | hsa-miR-1908 | -0.2 | N/A | Sites in UTR |
| NUDCD3   | NM_015332    | NudC domain containing 3                                                        | 0 | 0 | 0 | 0 | 1 | 0 | 0 | 1 | hsa-miR-663  | -0.2 | N/A | Sites in UTR |
| ACHE     | NM_015831    | acetylcholinesterase                                                            | 0 | 0 | 0 | 0 | 1 | 0 | 1 | 0 | hsa-miR-663  | -0.2 | N/A | Sites in UTR |

|          |              |                                                                       |   |   |   |   |   |   |   |   |              |      |     |              |
|----------|--------------|-----------------------------------------------------------------------|---|---|---|---|---|---|---|---|--------------|------|-----|--------------|
| ST3GAL1  | NM_003033    | ST3 beta-galactoside alpha-2,3-sialyltransferase 1                    | 0 | 0 | 0 | 0 | 1 | 0 | 1 | 0 | hsa-miR-663  | -0.2 | N/A | Sites in UTR |
| RNMT     | NM_003799    | RNA (guanine-7-) methyltransferase                                    | 0 | 0 | 0 | 0 | 1 | 0 | 1 | 0 | hsa-miR-1908 | -0.2 | N/A | Sites in UTR |
| FXD6     | NM_001164831 | FXD domain containing ion transport regulator 6                       | 0 | 0 | 0 | 0 | 1 | 0 | 1 | 0 | hsa-miR-663  | -0.2 | N/A | Sites in UTR |
| CADM3    | NM_001127173 | cell adhesion molecule 3                                              | 0 | 0 | 0 | 0 | 1 | 0 | 1 | 0 | hsa-miR-663  | -0.2 | N/A | Sites in UTR |
| LHX5     | NM_022363    | LIM homeobox 5                                                        | 0 | 0 | 0 | 0 | 1 | 0 | 1 | 0 | hsa-miR-663  | -0.2 | N/A | Sites in UTR |
| CPM      | NM_001005502 | carboxypeptidase M                                                    | 0 | 0 | 0 | 0 | 1 | 1 | 0 | 0 | hsa-miR-1908 | -0.2 | N/A | Sites in UTR |
| ASCL2    | NM_005170    | achaete-scute complex homolog 2 (Drosophila)                          | 0 | 0 | 0 | 0 | 1 | 0 | 0 | 1 | hsa-miR-1908 | -0.2 | N/A | Sites in UTR |
| CASP8    | NM_001080124 | caspase 8, apoptosis-related cysteine peptidase                       | 0 | 0 | 0 | 0 | 1 | 0 | 0 | 1 | hsa-miR-1908 | -0.2 | N/A | Sites in UTR |
| CHRNA7   | NM_000746    | cholinergic receptor, nicotinic, alpha 7                              | 0 | 0 | 0 | 0 | 1 | 0 | 0 | 1 | hsa-miR-1908 | -0.2 | N/A | Sites in UTR |
| NEK2     | NM_001204183 | NIMA (never in mitosis gene a)-related kinase 2                       | 0 | 0 | 0 | 0 | 1 | 0 | 0 | 1 | hsa-miR-1908 | -0.2 | N/A | Sites in UTR |
| PRR5     | NM_001017528 | proline rich 5 (renal)                                                | 0 | 0 | 0 | 0 | 1 | 0 | 0 | 1 | hsa-miR-663  | -0.2 | N/A | Sites in UTR |
| PVRL1    | NM_002855    | poliovirus receptor-related 1 (herpesvirus entry mediator C)          | 0 | 0 | 0 | 0 | 1 | 0 | 1 | 0 | hsa-miR-1908 | -0.2 | N/A | Sites in UTR |
| SNAPC2   | NM_003083    | small nuclear RNA activating complex, polypeptide 2, 45kDa            | 0 | 0 | 0 | 0 | 1 | 0 | 1 | 0 | hsa-miR-1908 | -0.2 | N/A | Sites in UTR |
| TNFRSF1B | NM_001066    | tumor necrosis factor receptor superfamily, member 1B                 | 0 | 0 | 0 | 0 | 1 | 0 | 1 | 0 | hsa-miR-1908 | -0.2 | N/A | Sites in UTR |
| TMEM179  | NM_207379    | transmembrane protein 179                                             | 0 | 0 | 0 | 0 | 1 | 0 | 1 | 0 | hsa-miR-663  | -0.2 | N/A | Sites in UTR |
| UGDH     | NM_001184700 | UDP-glucose 6-dehydrogenase                                           | 0 | 0 | 0 | 0 | 1 | 0 | 0 | 1 | hsa-miR-663  | -0.2 | N/A | Sites in UTR |
| C6orf89  | NM_152734    | chromosome 6 open reading frame 89                                    | 0 | 0 | 0 | 0 | 1 | 0 | 0 | 1 | hsa-miR-663  | -0.2 | N/A | Sites in UTR |
| TSKU     | NM_015516    | tsukushi small leucine rich proteoglycan homolog (Xenopus laevis)     | 0 | 0 | 0 | 0 | 1 | 0 | 1 | 0 | hsa-miR-663  | -0.2 | N/A | Sites in UTR |
| TOLLIP   | NM_019009    | toll interacting protein                                              | 0 | 0 | 0 | 0 | 1 | 0 | 1 | 0 | hsa-miR-663  | -0.2 | N/A | Sites in UTR |
| PRIC285  | NM_001037335 | peroxisomal proliferator-activated receptor A interacting complex 285 | 0 | 0 | 0 | 0 | 1 | 0 | 1 | 0 | hsa-miR-1908 | -0.2 | N/A | Sites in UTR |

|           |              |                                                                        |   |   |   |   |   |   |   |   |              |      |     |              |
|-----------|--------------|------------------------------------------------------------------------|---|---|---|---|---|---|---|---|--------------|------|-----|--------------|
| DRG2      | NM_001388    | developmentally regulated GTP binding protein 2                        | 0 | 0 | 0 | 0 | 1 | 0 | 0 | 1 | hsa-miR-663  | -0.2 | N/A | Sites in UTR |
| STX18     | NM_016930    | syntaxin 18                                                            | 0 | 0 | 0 | 0 | 1 | 0 | 0 | 1 | hsa-miR-1908 | -0.2 | N/A | Sites in UTR |
| CCDC124   | NM_001136203 | coiled-coil domain containing 124                                      | 0 | 0 | 0 | 0 | 1 | 0 | 0 | 1 | hsa-miR-663  | -0.2 | N/A | Sites in UTR |
| FGD5      | NM_152536    | FYVE, RhoGEF and PH domain containing 5                                | 0 | 0 | 0 | 0 | 1 | 0 | 0 | 1 | hsa-miR-663  | -0.2 | N/A | Sites in UTR |
| CAPS      | NM_004058    | calcyphosine                                                           | 0 | 0 | 0 | 0 | 1 | 0 | 1 | 0 | hsa-miR-663  | -0.2 | N/A | Sites in UTR |
| MSX2      | NM_002449    | msh homeobox 2                                                         | 0 | 0 | 0 | 0 | 1 | 0 | 1 | 0 | hsa-miR-1908 | -0.2 | N/A | Sites in UTR |
| PRKAR1B   | NM_001164758 | protein kinase, cAMP-dependent, regulatory, type I, beta               | 0 | 0 | 0 | 0 | 1 | 0 | 1 | 0 | hsa-miR-663  | -0.2 | N/A | Sites in UTR |
| CDCA4     | NM_017955    | cell division cycle associated 4                                       | 0 | 0 | 0 | 0 | 1 | 0 | 1 | 0 | hsa-miR-1908 | -0.2 | N/A | Sites in UTR |
| TET3      | NM_144993    | tet oncogene family member 3                                           | 0 | 0 | 0 | 0 | 1 | 0 | 1 | 0 | hsa-miR-663  | -0.2 | N/A | Sites in UTR |
| LOC728392 | NM_001162371 | hypothetical protein LOC728392                                         | 0 | 0 | 0 | 0 | 1 | 0 | 1 | 0 | hsa-miR-663  | -0.2 | N/A | Sites in UTR |
| NACC1     | NM_052876    | nucleus accumbens associated 1, BEN and BTB (POZ) domain containing    | 0 | 0 | 0 | 0 | 2 | 0 | 2 | 0 | hsa-miR-663  | -0.2 | N/A | Sites in UTR |
| FOSB      | NM_001114171 | FBJ murine osteosarcoma viral oncogene homolog B                       | 0 | 0 | 0 | 0 | 1 | 0 | 1 | 0 | hsa-miR-1908 | -0.2 | N/A | Sites in UTR |
| MYO1F     | NM_012335    | myosin IF                                                              | 0 | 0 | 0 | 0 | 1 | 0 | 1 | 0 | hsa-miR-663  | -0.2 | N/A | Sites in UTR |
| SLC16A3   | NM_001042422 | solute carrier family 16, member 3 (monocarboxylic acid transporter 4) | 0 | 0 | 0 | 0 | 1 | 0 | 1 | 0 | hsa-miR-663  | -0.2 | N/A | Sites in UTR |
| MGRN1     | NM_001142289 | mahogunin, ring finger 1                                               | 0 | 0 | 0 | 0 | 1 | 0 | 1 | 0 | hsa-miR-663  | -0.2 | N/A | Sites in UTR |
| AGPAT3    | NM_001037553 | 1-acylglycerol-3-phosphate O-acyltransferase 3                         | 0 | 0 | 0 | 0 | 1 | 0 | 1 | 0 | hsa-miR-1908 | -0.2 | N/A | Sites in UTR |
| TMUB1     | NM_001136044 | transmembrane and ubiquitin-like domain containing 1                   | 0 | 0 | 0 | 0 | 1 | 0 | 1 | 0 | hsa-miR-663  | -0.2 | N/A | Sites in UTR |
| JDP2      | NM_001135047 | Jun dimerization protein 2                                             | 0 | 0 | 0 | 0 | 1 | 0 | 1 | 0 | hsa-miR-663  | -0.2 | N/A | Sites in UTR |
| MAFA      | NM_201589    | v-maf musculoaponeurotic fibrosarcoma oncogene homolog A (avian)       | 0 | 0 | 0 | 0 | 1 | 0 | 1 | 0 | hsa-miR-663  | -0.2 | N/A | Sites in UTR |
| MAPK3     | NM_001040056 | mitogen-activated protein kinase 3                                     | 0 | 0 | 0 | 0 | 1 | 0 | 0 | 1 | hsa-miR-1908 | -0.2 | N/A | Sites in UTR |

|          |              |                                                                                         |   |   |   |   |   |   |   |   |              |       |     |              |
|----------|--------------|-----------------------------------------------------------------------------------------|---|---|---|---|---|---|---|---|--------------|-------|-----|--------------|
| MAPK13   | NM_002754    | mitogen-activated protein kinase 13                                                     | 0 | 0 | 0 | 0 | 1 | 0 | 0 | 1 | hsa-miR-663  | -0.2  | N/A | Sites in UTR |
| NUDT19   | NM_001105570 | nudix (nucleoside diphosphate linked moiety X)-type motif 19                            | 0 | 0 | 0 | 0 | 1 | 0 | 0 | 1 | hsa-miR-663  | -0.2  | N/A | Sites in UTR |
| ACTC1    | NM_005159    | actin, alpha, cardiac muscle 1                                                          | 0 | 0 | 0 | 0 | 1 | 0 | 1 | 0 | hsa-miR-1908 | -0.2  | N/A | Sites in UTR |
| RAC3     | NM_005052    | ras-related C3 botulinum toxin substrate 3 (rho family, small GTP binding protein Rac3) | 0 | 0 | 0 | 0 | 1 | 0 | 1 | 0 | hsa-miR-663  | -0.2  | N/A | Sites in UTR |
| HDGFRP2  | NM_001001520 | hepatoma-derived growth factor-related protein 2                                        | 0 | 0 | 0 | 0 | 1 | 0 | 1 | 0 | hsa-miR-1908 | -0.2  | N/A | Sites in UTR |
| C19orf6  | NM_001033026 | chromosome 19 open reading frame 6                                                      | 0 | 0 | 0 | 0 | 1 | 0 | 1 | 0 | hsa-miR-1908 | -0.2  | N/A | Sites in UTR |
| FOXD2    | NM_004474    | forkhead box D2                                                                         | 0 | 0 | 0 | 0 | 1 | 0 | 0 | 1 | hsa-miR-1908 | -0.19 | N/A | Sites in UTR |
| HCFC1    | NM_005334    | host cell factor C1 (VP16-accessory protein)                                            | 0 | 0 | 0 | 0 | 1 | 0 | 0 | 1 | hsa-miR-1908 | -0.19 | N/A | Sites in UTR |
| TNPO3    | NM_001191028 | transportin 3                                                                           | 0 | 0 | 0 | 0 | 1 | 0 | 0 | 1 | hsa-miR-663  | -0.19 | N/A | Sites in UTR |
| PLEKHN1  | NM_001160184 | pleckstrin homology domain containing, family N member 1                                | 0 | 0 | 0 | 0 | 1 | 0 | 0 | 1 | hsa-miR-663  | -0.19 | N/A | Sites in UTR |
| CCDC127  | NM_145265    | coiled-coil domain containing 127                                                       | 0 | 0 | 0 | 0 | 1 | 0 | 0 | 1 | hsa-miR-1908 | -0.19 | N/A | Sites in UTR |
| IRF4     | NM_001195286 | interferon regulatory factor 4                                                          | 0 | 0 | 0 | 0 | 1 | 0 | 1 | 0 | hsa-miR-663  | -0.19 | N/A | Sites in UTR |
| RAB8A    | NM_005370    | RAB8A, member RAS oncogene family                                                       | 0 | 0 | 0 | 0 | 1 | 0 | 1 | 0 | hsa-miR-1908 | -0.19 | N/A | Sites in UTR |
| BRSK2    | NM_003957    | BR serine/threonine kinase 2                                                            | 0 | 0 | 0 | 0 | 1 | 0 | 1 | 0 | hsa-miR-663  | -0.19 | N/A | Sites in UTR |
| NRG2     | NM_001184935 | neuregulin 2                                                                            | 0 | 0 | 0 | 0 | 2 | 0 | 2 | 0 | hsa-miR-663  | -0.19 | N/A | Sites in UTR |
| EML3     | NM_153265    | echinoderm microtubule associated protein like 3                                        | 0 | 0 | 0 | 0 | 1 | 0 | 1 | 0 | hsa-miR-663  | -0.19 | N/A | Sites in UTR |
| KLHL29   | NM_052920    | kelch-like 29 (Drosophila)                                                              | 0 | 0 | 0 | 0 | 1 | 0 | 0 | 1 | hsa-miR-663  | -0.19 | N/A | Sites in UTR |
| SLC22A12 | NM_144585    | solute carrier family 22 (organic anion/urate transporter), member 12                   | 0 | 0 | 0 | 0 | 1 | 0 | 0 | 1 | hsa-miR-1908 | -0.19 | N/A | Sites in UTR |
| BCL9L    | NM_182557    | B-cell CLL/lymphoma 9-like                                                              | 0 | 0 | 0 | 0 | 1 | 0 | 0 | 1 | hsa-miR-1908 | -0.19 | N/A | Sites in UTR |
| GGA1     | NM_001001560 | golgi-associated, gamma adaptin ear containing, ARF binding protein 1                   | 0 | 0 | 0 | 0 | 1 | 0 | 1 | 0 | hsa-miR-1908 | -0.19 | N/A | Sites in UTR |



|                 |              |                                                      |   |   |   |   |   |   |   |   |              |       |     |              |
|-----------------|--------------|------------------------------------------------------|---|---|---|---|---|---|---|---|--------------|-------|-----|--------------|
| REM2            | NM_173527    | RAS (RAD and GEM)-like GTP binding 2                 | 0 | 0 | 0 | 0 | 1 | 0 | 1 | 0 | hsa-miR-1908 | -0.19 | N/A | Sites in UTR |
| CBS             | NM_000071    | cystathionine-beta-synthase                          | 0 | 0 | 0 | 0 | 1 | 0 | 0 | 1 | hsa-miR-663  | -0.19 | N/A | Sites in UTR |
| GJA3            | NM_021954    | gap junction protein, alpha 3, 46kDa                 | 0 | 0 | 0 | 0 | 1 | 0 | 0 | 1 | hsa-miR-1908 | -0.19 | N/A | Sites in UTR |
| CABP1           | NM_001033677 | calcium binding protein 1                            | 0 | 0 | 0 | 0 | 1 | 0 | 0 | 1 | hsa-miR-663  | -0.19 | N/A | Sites in UTR |
| TBC1D14         | NM_001113361 | TBC1 domain family, member 14                        | 0 | 0 | 0 | 0 | 1 | 0 | 0 | 1 | hsa-miR-1908 | -0.19 | N/A | Sites in UTR |
| C17orf62        | NM_001033046 | chromosome 17 open reading frame 62                  | 0 | 0 | 0 | 0 | 1 | 0 | 0 | 1 | hsa-miR-1908 | -0.19 | N/A | Sites in UTR |
| YPEL3           | NM_001145524 | yippee-like 3 (Drosophila)                           | 0 | 0 | 0 | 0 | 1 | 0 | 0 | 1 | hsa-miR-663  | -0.19 | N/A | Sites in UTR |
| C3orf21         | NM_152531    | chromosome 3 open reading frame 21                   | 0 | 0 | 0 | 0 | 1 | 0 | 0 | 1 | hsa-miR-1908 | -0.19 | N/A | Sites in UTR |
| MBOAT1          | NM_001080480 | membrane bound O-acyltransferase domain containing 1 | 0 | 0 | 0 | 0 | 1 | 0 | 0 | 1 | hsa-miR-663  | -0.19 | N/A | Sites in UTR |
| BCL2L13         | NM_015367    | BCL2-like 13 (apoptosis facilitator)                 | 0 | 0 | 0 | 0 | 1 | 0 | 1 | 0 | hsa-miR-1908 | -0.19 | N/A | Sites in UTR |
| KIAA1522        | NM_001198972 | KIAA1522                                             | 0 | 0 | 0 | 0 | 1 | 0 | 1 | 0 | hsa-miR-1908 | -0.19 | N/A | Sites in UTR |
| TOM1L2          | NM_001033551 | target of myb1-like 2 (chicken)                      | 0 | 0 | 0 | 0 | 1 | 0 | 1 | 0 | hsa-miR-1908 | -0.19 | N/A | Sites in UTR |
| CDK6            | NM_001145306 | cyclin-dependent kinase 6                            | 0 | 0 | 0 | 0 | 3 | 0 | 3 | 0 | hsa-miR-1908 | -0.19 | N/A | Sites in UTR |
| SCNM1           | NM_001204856 | sodium channel modifier 1                            | 0 | 0 | 0 | 0 | 1 | 0 | 0 | 1 | hsa-miR-663  | -0.19 | N/A | Sites in UTR |
| TNFAIP8L2-SCNM1 | NM_001204848 | TNFAIP8L2-SCNM1 readthrough                          | 0 | 0 | 0 | 0 | 1 | 0 | 0 | 1 | hsa-miR-663  | -0.19 | N/A | Sites in UTR |
| OSBP2           | NM_030758    | oxysterol binding protein 2                          | 0 | 0 | 0 | 0 | 1 | 0 | 1 | 0 | hsa-miR-1908 | -0.19 | N/A | Sites in UTR |
| PANX2           | NM_001160300 | pannexin 2                                           | 0 | 0 | 0 | 0 | 1 | 0 | 1 | 0 | hsa-miR-663  | -0.19 | N/A | Sites in UTR |
| VIPR2           | NM_003382    | vasoactive intestinal peptide receptor 2             | 0 | 0 | 0 | 0 | 1 | 0 | 0 | 1 | hsa-miR-663  | -0.19 | N/A | Sites in UTR |
| COTL1           | NM_021149    | coactosin-like 1 (Dictyostelium)                     | 0 | 0 | 0 | 0 | 2 | 1 | 0 | 1 | hsa-miR-663  | -0.19 | N/A | Sites in UTR |
| ACOXL           | NM_001142807 | acyl-CoA oxidase-like                                | 0 | 0 | 0 | 0 | 1 | 0 | 0 | 1 | hsa-miR-1908 | -0.19 | N/A | Sites in UTR |

|          |              |                                                                                     |   |   |   |   |   |   |   |   |              |       |     |              |
|----------|--------------|-------------------------------------------------------------------------------------|---|---|---|---|---|---|---|---|--------------|-------|-----|--------------|
| TMEM159  | NM_020422    | transmembrane protein 159                                                           | 0 | 0 | 0 | 0 | 1 | 0 | 0 | 1 | hsa-miR-1908 | -0.19 | N/A | Sites in UTR |
| C19orf35 | NM_198532    | chromosome 19 open reading frame 35                                                 | 0 | 0 | 0 | 0 | 1 | 0 | 0 | 1 | hsa-miR-663  | -0.19 | N/A | Sites in UTR |
| SSH3     | NM_017857    | slingshot homolog 3 (Drosophila)                                                    | 0 | 0 | 0 | 0 | 1 | 0 | 1 | 0 | hsa-miR-663  | -0.19 | N/A | Sites in UTR |
| MAP2K3   | NM_002756    | mitogen-activated protein kinase kinase 3                                           | 0 | 0 | 0 | 0 | 1 | 0 | 0 | 1 | hsa-miR-663  | -0.19 | N/A | Sites in UTR |
| PSD4     | NM_012455    | pleckstrin and Sec7 domain containing 4                                             | 0 | 0 | 0 | 0 | 1 | 0 | 0 | 1 | hsa-miR-1908 | -0.19 | N/A | Sites in UTR |
| STAG3L1  | NM_001002840 | stromal antigen 3-like 1                                                            | 0 | 0 | 0 | 0 | 1 | 0 | 0 | 1 | hsa-miR-663  | -0.19 | N/A | Sites in UTR |
| COL6A2   | NM_001849    | collagen, type VI, alpha 2                                                          | 0 | 0 | 0 | 0 | 1 | 0 | 1 | 0 | hsa-miR-663  | -0.19 | N/A | Sites in UTR |
| NPB      | NM_148896    | neuropeptide B                                                                      | 0 | 0 | 0 | 0 | 1 | 0 | 1 | 0 | hsa-miR-663  | -0.19 | N/A | Sites in UTR |
| BLCAP    | NM_001167820 | bladder cancer associated protein                                                   | 0 | 0 | 0 | 0 | 1 | 0 | 0 | 1 | hsa-miR-1908 | -0.19 | N/A | Sites in UTR |
| ZNF853   | NM_017560    | zinc finger protein 853                                                             | 0 | 0 | 0 | 0 | 1 | 0 | 0 | 1 | hsa-miR-1908 | -0.19 | N/A | Sites in UTR |
| C1GALT1  | NM_020156    | core 1 synthase, glycoprotein-N-acetylgalactosamine 3-beta-galactosyltransferase, 1 | 0 | 0 | 0 | 0 | 1 | 1 | 0 | 0 | hsa-miR-663  | -0.19 | N/A | Sites in UTR |
| CDKN1A   | NM_000389    | cyclin-dependent kinase inhibitor 1A (p21, Cip1)                                    | 0 | 0 | 0 | 0 | 1 | 0 | 1 | 0 | hsa-miR-663  | -0.19 | N/A | Sites in UTR |
| COL5A1   | NM_000093    | collagen, type V, alpha 1                                                           | 0 | 0 | 0 | 0 | 1 | 0 | 1 | 0 | hsa-miR-663  | -0.19 | N/A | Sites in UTR |
| PHYHIP   | NM_001099335 | phytanoyl-CoA 2-hydroxylase interacting protein                                     | 0 | 0 | 0 | 0 | 1 | 0 | 1 | 0 | hsa-miR-663  | -0.19 | N/A | Sites in UTR |
| RABEP2   | NM_024816    | rabaptin, RAB GTPase binding effector protein 2                                     | 0 | 0 | 0 | 0 | 1 | 0 | 1 | 0 | hsa-miR-663  | -0.19 | N/A | Sites in UTR |
| PRRC2B   | NM_013318    | proline-rich coiled-coil 2B                                                         | 0 | 0 | 0 | 0 | 1 | 0 | 1 | 0 | hsa-miR-663  | -0.19 | N/A | Sites in UTR |
| INO80E   | NM_173618    | INO80 complex subunit E                                                             | 0 | 0 | 0 | 0 | 1 | 0 | 1 | 0 | hsa-miR-663  | -0.19 | N/A | Sites in UTR |
| CSK      | NM_001127190 | c-src tyrosine kinase                                                               | 0 | 0 | 0 | 0 | 1 | 0 | 0 | 1 | hsa-miR-663  | -0.19 | N/A | Sites in UTR |
| TMBIM6   | NM_001098576 | transmembrane BAX inhibitor motif containing 6                                      | 0 | 0 | 0 | 0 | 1 | 0 | 0 | 1 | hsa-miR-1908 | -0.19 | N/A | Sites in UTR |
| DAZAP2   | NM_001136264 | DAZ associated protein 2                                                            | 0 | 0 | 0 | 0 | 1 | 0 | 0 | 1 | hsa-miR-1908 | -0.19 | N/A | Sites in UTR |

|           |              |                                                                      |   |   |   |   |   |   |   |   |              |       |     |              |
|-----------|--------------|----------------------------------------------------------------------|---|---|---|---|---|---|---|---|--------------|-------|-----|--------------|
| SLU7      | NM_006425    | SLU7 splicing factor homolog ( <i>S. cerevisiae</i> )                | 0 | 0 | 0 | 0 | 1 | 0 | 0 | 1 | hsa-miR-663  | -0.19 | N/A | Sites in UTR |
| ZC3H3     | NM_015117    | zinc finger CCCH-type containing 3                                   | 0 | 0 | 0 | 0 | 1 | 0 | 0 | 1 | hsa-miR-1908 | -0.19 | N/A | Sites in UTR |
| C7orf50   | NM_001134395 | chromosome 7 open reading frame 50                                   | 0 | 0 | 0 | 0 | 1 | 0 | 0 | 1 | hsa-miR-663  | -0.19 | N/A | Sites in UTR |
| VPS53     | NM_001128159 | vacuolar protein sorting 53 homolog ( <i>S. cerevisiae</i> )         | 0 | 0 | 0 | 0 | 2 | 0 | 1 | 1 | hsa-miR-663  | -0.19 | N/A | Sites in UTR |
| JUP       | NM_002230    | junction plakoglobin                                                 | 0 | 0 | 0 | 0 | 1 | 0 | 1 | 0 | hsa-miR-663  | -0.19 | N/A | Sites in UTR |
| CDK16     | NM_001170460 | cyclin-dependent kinase 16                                           | 0 | 0 | 0 | 0 | 1 | 0 | 1 | 0 | hsa-miR-1908 | -0.19 | N/A | Sites in UTR |
| SGPL1     | NM_003901    | sphingosine-1-phosphate lyase 1                                      | 0 | 0 | 0 | 0 | 1 | 0 | 1 | 0 | hsa-miR-663  | -0.19 | N/A | Sites in UTR |
| CYP2W1    | NM_017781    | cytochrome P450, family 2, subfamily W, polypeptide 1                | 0 | 0 | 0 | 0 | 1 | 0 | 1 | 0 | hsa-miR-1908 | -0.19 | N/A | Sites in UTR |
| PLCXD1    | NM_018390    | phosphatidylinositol-specific phospholipase C, X domain containing 1 | 0 | 0 | 0 | 0 | 2 | 0 | 0 | 2 | hsa-miR-1908 | -0.19 | N/A | Sites in UTR |
| VENTX     | NM_014468    | VENT homeobox                                                        | 0 | 0 | 0 | 0 | 1 | 0 | 0 | 1 | hsa-miR-1908 | -0.19 | N/A | Sites in UTR |
| RTN4R     | NM_023004    | reticulon 4 receptor                                                 | 0 | 0 | 0 | 0 | 1 | 0 | 0 | 1 | hsa-miR-1908 | -0.19 | N/A | Sites in UTR |
| ITPK1     | NM_001142594 | inositol-tetrakisphosphate 1-kinase                                  | 0 | 0 | 0 | 0 | 1 | 0 | 1 | 0 | hsa-miR-1908 | -0.19 | N/A | Sites in UTR |
| PDRG1     | NM_030815    | p53 and DNA-damage regulated 1                                       | 0 | 0 | 0 | 0 | 1 | 0 | 0 | 1 | hsa-miR-1908 | -0.18 | N/A | Sites in UTR |
| TP53I11   | NM_001076787 | tumor protein p53 inducible protein 11                               | 0 | 0 | 0 | 0 | 1 | 0 | 1 | 0 | hsa-miR-663  | -0.18 | N/A | Sites in UTR |
| ANK1      | NM_000037    | ankyrin 1, erythrocytic                                              | 0 | 0 | 0 | 0 | 2 | 0 | 2 | 0 | hsa-miR-663  | -0.18 | N/A | Sites in UTR |
| RORC      | NM_001001523 | RAR-related orphan receptor C                                        | 0 | 0 | 0 | 0 | 1 | 0 | 0 | 1 | hsa-miR-1908 | -0.18 | N/A | Sites in UTR |
| ARHGAP11A | NM_014783    | Rho GTPase activating protein 11A                                    | 0 | 0 | 0 | 0 | 1 | 0 | 0 | 1 | hsa-miR-1908 | -0.18 | N/A | Sites in UTR |
| FBXO21    | NM_015002    | F-box protein 21                                                     | 0 | 0 | 0 | 0 | 1 | 0 | 0 | 1 | hsa-miR-663  | -0.18 | N/A | Sites in UTR |
| TSPEAR    | NM_144991    | thrombospondin-type laminin G domain and EAR repeats                 | 0 | 0 | 0 | 0 | 1 | 0 | 0 | 1 | hsa-miR-1908 | -0.18 | N/A | Sites in UTR |
| QPCTL     | NM_001163377 | glutaminy-peptide cyclotransferase-like                              | 0 | 0 | 0 | 0 | 1 | 0 | 0 | 1 | hsa-miR-1908 | -0.18 | N/A | Sites in UTR |

|          |              |                                                                       |   |   |   |   |   |   |   |   |              |       |     |              |
|----------|--------------|-----------------------------------------------------------------------|---|---|---|---|---|---|---|---|--------------|-------|-----|--------------|
| AKIP1    | NM_001206645 | A kinase (PRKA) interacting protein 1                                 | 0 | 0 | 0 | 0 | 1 | 0 | 0 | 1 | hsa-miR-663  | -0.18 | N/A | Sites in UTR |
| SMURF1   | NM_001199847 | SMAD specific E3 ubiquitin protein ligase 1                           | 0 | 0 | 0 | 0 | 1 | 0 | 0 | 1 | hsa-miR-663  | -0.18 | N/A | Sites in UTR |
| GRHL2    | NM_024915    | grainyhead-like 2 (Drosophila)                                        | 0 | 0 | 0 | 0 | 1 | 0 | 0 | 1 | hsa-miR-663  | -0.18 | N/A | Sites in UTR |
| C19orf12 | NM_001031726 | chromosome 19 open reading frame 12                                   | 0 | 0 | 0 | 0 | 1 | 0 | 0 | 1 | hsa-miR-1908 | -0.18 | N/A | Sites in UTR |
| SCARF2   | NM_153334    | scavenger receptor class F, member 2                                  | 0 | 0 | 0 | 0 | 1 | 0 | 0 | 1 | hsa-miR-1908 | -0.18 | N/A | Sites in UTR |
| SLC43A2  | NM_152346    | solute carrier family 43, member 2                                    | 0 | 0 | 0 | 0 | 1 | 0 | 0 | 1 | hsa-miR-663  | -0.18 | N/A | Sites in UTR |
| SLC25A47 | NM_207117    | solute carrier family 25, member 47                                   | 0 | 0 | 0 | 0 | 1 | 0 | 0 | 1 | hsa-miR-1908 | -0.18 | N/A | Sites in UTR |
| CEBPB    | NM_005194    | CCAAT/enhancer binding protein (C/EBP), beta                          | 0 | 0 | 0 | 0 | 1 | 0 | 1 | 0 | hsa-miR-663  | -0.18 | N/A | Sites in UTR |
| VGF      | NM_003378    | VGF nerve growth factor inducible                                     | 0 | 0 | 0 | 0 | 1 | 0 | 1 | 0 | hsa-miR-663  | -0.18 | N/A | Sites in UTR |
| N4BP3    | NM_015111    | NEDD4 binding protein 3                                               | 0 | 0 | 0 | 0 | 1 | 0 | 1 | 0 | hsa-miR-1908 | -0.18 | N/A | Sites in UTR |
| IGF1R    | NM_000875    | insulin-like growth factor 1 receptor                                 | 0 | 0 | 0 | 0 | 2 | 1 | 1 | 0 | hsa-miR-663  | -0.18 | N/A | Sites in UTR |
| SS18     | NM_001007559 | synovial sarcoma translocation, chromosome 18                         | 0 | 0 | 0 | 0 | 1 | 0 | 0 | 1 | hsa-miR-1908 | -0.18 | N/A | Sites in UTR |
| MALL     | NM_005434    | mal, T-cell differentiation protein-like                              | 0 | 0 | 0 | 0 | 1 | 0 | 0 | 1 | hsa-miR-663  | -0.18 | N/A | Sites in UTR |
| ARFGAP2  | NM_001242832 | ADP-ribosylation factor GTPase activating protein 2                   | 0 | 0 | 0 | 0 | 1 | 0 | 0 | 1 | hsa-miR-663  | -0.18 | N/A | Sites in UTR |
| CLCN6    | NM_001286    | chloride channel 6                                                    | 0 | 0 | 0 | 0 | 1 | 0 | 1 | 0 | hsa-miR-663  | -0.18 | N/A | Sites in UTR |
| SGTA     | NM_003021    | small glutamine-rich tetratricopeptide repeat (TPR)-containing, alpha | 0 | 0 | 0 | 0 | 1 | 0 | 1 | 0 | hsa-miR-663  | -0.18 | N/A | Sites in UTR |
| WDR1     | NM_005112    | WD repeat domain 1                                                    | 0 | 0 | 0 | 0 | 2 | 0 | 2 | 0 | hsa-miR-663  | -0.18 | N/A | Sites in UTR |
| SLC8A3   | NM_001130417 | solute carrier family 8 (sodium/calcium exchanger), member 3          | 0 | 0 | 0 | 0 | 1 | 0 | 0 | 1 | hsa-miR-663  | -0.18 | N/A | Sites in UTR |
| SSR3     | NM_007107    | signal sequence receptor, gamma (translocon-associated protein gamma) | 0 | 0 | 0 | 0 | 1 | 0 | 0 | 1 | hsa-miR-663  | -0.18 | N/A | Sites in UTR |
| ZNF2     | NM_001017396 | zinc finger protein 2                                                 | 0 | 0 | 0 | 0 | 1 | 0 | 0 | 1 | hsa-miR-1908 | -0.18 | N/A | Sites in UTR |

|          |              |                                                             |   |   |   |   |   |   |   |   |              |       |     |              |
|----------|--------------|-------------------------------------------------------------|---|---|---|---|---|---|---|---|--------------|-------|-----|--------------|
| ZSWIM1   | NM_080603    | zinc finger, SWIM-type containing 1                         | 0 | 0 | 0 | 0 | 1 | 0 | 0 | 1 | hsa-miR-663  | -0.18 | N/A | Sites in UTR |
| ZNF543   | NM_213598    | zinc finger protein 543                                     | 0 | 0 | 0 | 0 | 1 | 0 | 0 | 1 | hsa-miR-663  | -0.18 | N/A | Sites in UTR |
| IGLON5   | NM_001101372 | IgLON family member 5                                       | 0 | 0 | 0 | 0 | 1 | 0 | 0 | 1 | hsa-miR-663  | -0.18 | N/A | Sites in UTR |
| ARHGAP1  | NM_004308    | Rho GTPase activating protein 1                             | 0 | 0 | 0 | 0 | 1 | 0 | 1 | 0 | hsa-miR-663  | -0.18 | N/A | Sites in UTR |
| JUND     | NM_005354    | jun D proto-oncogene                                        | 1 | 0 | 1 | 0 | 0 | 0 | 0 | 0 | hsa-miR-663  | -0.18 | N/A | Sites in UTR |
| RANBP3   | NM_003624    | RAN binding protein 3                                       | 0 | 0 | 0 | 0 | 1 | 0 | 1 | 0 | hsa-miR-663  | -0.18 | N/A | Sites in UTR |
| PODNL1   | NM_001146254 | podocan-like 1                                              | 1 | 0 | 1 | 0 | 0 | 0 | 0 | 0 | hsa-miR-1908 | -0.18 | N/A | Sites in UTR |
| RASL10B  | NM_033315    | RAS-like, family 10, member B                               | 0 | 0 | 0 | 0 | 1 | 0 | 1 | 0 | hsa-miR-1908 | -0.18 | N/A | Sites in UTR |
| PSPH     | NM_004577    | phosphoserine phosphatase                                   | 0 | 0 | 0 | 0 | 1 | 0 | 0 | 1 | hsa-miR-663  | -0.18 | N/A | Sites in UTR |
| TBCCD1   | NM_001134415 | TBCC domain containing 1                                    | 0 | 0 | 0 | 0 | 1 | 0 | 0 | 1 | hsa-miR-663  | -0.18 | N/A | Sites in UTR |
| ADCY1    | NM_021116    | adenylate cyclase 1 (brain)                                 | 0 | 0 | 0 | 0 | 1 | 0 | 1 | 0 | hsa-miR-663  | -0.18 | N/A | Sites in UTR |
| ATP2B2   | NM_001001331 | ATPase, Ca++ transporting, plasma membrane 2                | 0 | 0 | 0 | 0 | 2 | 0 | 0 | 2 | hsa-miR-1908 | -0.18 | N/A | Sites in UTR |
| TAB1     | NM_153497    | TGF-beta activated kinase 1/MAP3K7 binding protein 1        | 0 | 0 | 0 | 0 | 1 | 0 | 1 | 0 | hsa-miR-1908 | -0.18 | N/A | Sites in UTR |
| KIAA0664 | NM_015229    | KIAA0664                                                    | 0 | 0 | 0 | 0 | 1 | 0 | 1 | 0 | hsa-miR-1908 | -0.18 | N/A | Sites in UTR |
| SH3BP5L  | NM_030645    | SH3-binding domain protein 5-like                           | 0 | 0 | 0 | 0 | 1 | 0 | 1 | 0 | hsa-miR-1908 | -0.18 | N/A | Sites in UTR |
| OSR1     | NM_145260    | odd-skipped related 1 (Drosophila)                          | 0 | 0 | 0 | 0 | 1 | 0 | 1 | 0 | hsa-miR-1908 | -0.18 | N/A | Sites in UTR |
| LTBP4    | NM_001042544 | latent transforming growth factor beta binding protein 4    | 0 | 0 | 0 | 0 | 1 | 0 | 0 | 1 | hsa-miR-663  | -0.18 | N/A | Sites in UTR |
| SLC27A1  | NM_198580    | solute carrier family 27 (fatty acid transporter), member 1 | 0 | 0 | 0 | 0 | 1 | 0 | 0 | 1 | hsa-miR-1908 | -0.18 | N/A | Sites in UTR |
| TK2      | NM_001172643 | thymidine kinase 2, mitochondrial                           | 0 | 0 | 0 | 0 | 1 | 0 | 1 | 0 | hsa-miR-1908 | -0.18 | N/A | Sites in UTR |
| C19orf63 | NM_175063    | chromosome 19 open reading frame 63                         | 0 | 0 | 0 | 0 | 1 | 0 | 1 | 0 | hsa-miR-1908 | -0.18 | N/A | Sites in UTR |

|           |              |                                                                                   |   |   |   |   |   |   |   |   |              |       |     |              |
|-----------|--------------|-----------------------------------------------------------------------------------|---|---|---|---|---|---|---|---|--------------|-------|-----|--------------|
| PRDM16    | NM_022114    | PR domain containing 16                                                           | 0 | 0 | 0 | 0 | 2 | 0 | 1 | 1 | hsa-miR-1908 | -0.18 | N/A | Sites in UTR |
| DTNB      | NM_021907    | dystrobrevin, beta                                                                | 0 | 0 | 0 | 0 | 1 | 0 | 0 | 1 | hsa-miR-1908 | -0.18 | N/A | Sites in UTR |
| GPI       | NM_000175    | glucose-6-phosphate isomerase                                                     | 0 | 0 | 0 | 0 | 1 | 0 | 0 | 1 | hsa-miR-1908 | -0.18 | N/A | Sites in UTR |
| LHX3      | NM_014564    | LIM homeobox 3                                                                    | 0 | 0 | 0 | 0 | 1 | 0 | 0 | 1 | hsa-miR-663  | -0.18 | N/A | Sites in UTR |
| TRIM29    | NM_012101    | tripartite motif containing 29                                                    | 0 | 0 | 0 | 0 | 1 | 0 | 0 | 1 | hsa-miR-1908 | -0.18 | N/A | Sites in UTR |
| STC2      | NM_003714    | stanniocalcin 2                                                                   | 0 | 0 | 0 | 0 | 1 | 1 | 0 | 0 | hsa-miR-1908 | -0.18 | N/A | Sites in UTR |
| AGAP3     | NM_001042535 | ArfGAP with GTPase domain, ankyrin repeat and PH domain 3                         | 0 | 0 | 0 | 0 | 1 | 0 | 1 | 0 | hsa-miR-1908 | -0.18 | N/A | Sites in UTR |
| ZNF793    | NM_001013659 | zinc finger protein 793                                                           | 0 | 0 | 0 | 0 | 1 | 0 | 1 | 0 | hsa-miR-663  | -0.18 | N/A | Sites in UTR |
| LGALS8    | NM_006499    | lectin, galactoside-binding, soluble, 8                                           | 0 | 0 | 0 | 0 | 1 | 0 | 0 | 1 | hsa-miR-1908 | -0.18 | N/A | Sites in UTR |
| DGKI      | NM_004717    | diacylglycerol kinase, iota                                                       | 0 | 0 | 0 | 0 | 1 | 0 | 0 | 1 | hsa-miR-663  | -0.18 | N/A | Sites in UTR |
| RPH3AL    | NM_001190411 | rabphilin 3A-like (without C2 domains)                                            | 0 | 0 | 0 | 0 | 1 | 0 | 0 | 1 | hsa-miR-1908 | -0.18 | N/A | Sites in UTR |
| NARFL     | NM_022493    | nuclear prelamin A recognition factor-like                                        | 0 | 0 | 0 | 0 | 1 | 0 | 0 | 1 | hsa-miR-1908 | -0.18 | N/A | Sites in UTR |
| ZSWIM7    | NM_001042697 | zinc finger, SWIM-type containing 7                                               | 0 | 0 | 0 | 0 | 1 | 0 | 0 | 1 | hsa-miR-1908 | -0.18 | N/A | Sites in UTR |
| CITED2    | NM_001168388 | Cbp/p300-interacting transactivator, with Glu/Asp-rich carboxy-terminal domain, 2 | 0 | 0 | 0 | 0 | 1 | 0 | 1 | 0 | hsa-miR-663  | -0.18 | N/A | Sites in UTR |
| CYHR1     | NM_138496    | cysteine/histidine-rich 1                                                         | 0 | 0 | 0 | 0 | 1 | 0 | 1 | 0 | hsa-miR-663  | -0.18 | N/A | Sites in UTR |
| MBD6      | NM_052897    | methyl-CpG binding domain protein 6                                               | 0 | 0 | 0 | 0 | 1 | 0 | 1 | 0 | hsa-miR-663  | -0.18 | N/A | Sites in UTR |
| C17orf108 | NM_001076680 | chromosome 17 open reading frame 108                                              | 0 | 0 | 0 | 0 | 1 | 0 | 1 | 0 | hsa-miR-663  | -0.18 | N/A | Sites in UTR |
| UTP11L    | NM_016037    | UTP11-like, U3 small nucleolar ribonucleoprotein, (yeast)                         | 0 | 0 | 0 | 0 | 1 | 0 | 0 | 1 | hsa-miR-663  | -0.18 | N/A | Sites in UTR |
| CTTN      | NM_005231    | cortactin                                                                         | 0 | 0 | 0 | 0 | 1 | 0 | 1 | 0 | hsa-miR-1908 | -0.18 | N/A | Sites in UTR |
| PBX2      | NM_002586    | pre-B-cell leukemia homeobox 2                                                    | 0 | 0 | 0 | 0 | 1 | 0 | 1 | 0 | hsa-miR-1908 | -0.18 | N/A | Sites in UTR |

|          |              |                                                                                                        |   |   |   |   |   |   |   |   |              |       |     |              |
|----------|--------------|--------------------------------------------------------------------------------------------------------|---|---|---|---|---|---|---|---|--------------|-------|-----|--------------|
| PTAR1    | NM_001099666 | protein prenyltransferase alpha subunit repeat containing 1                                            | 0 | 0 | 0 | 0 | 1 | 0 | 1 | 0 | hsa-miR-1908 | -0.18 | N/A | Sites in UTR |
| CACNA1B  | NM_000718    | calcium channel, voltage-dependent, N type, alpha 1B subunit                                           | 0 | 0 | 0 | 0 | 1 | 0 | 0 | 1 | hsa-miR-1908 | -0.18 | N/A | Sites in UTR |
| CAMK2G   | NM_001204492 | calcium/calmodulin-dependent protein kinase II gamma                                                   | 0 | 0 | 0 | 0 | 1 | 0 | 0 | 1 | hsa-miR-1908 | -0.18 | N/A | Sites in UTR |
| KCNJ15   | NM_002243    | potassium inwardly-rectifying channel, subfamily J, member 15                                          | 0 | 0 | 0 | 0 | 1 | 0 | 0 | 1 | hsa-miR-1908 | -0.18 | N/A | Sites in UTR |
| SEC14L1  | NM_001143998 | SEC14-like 1 ( <i>S. cerevisiae</i> )                                                                  | 0 | 0 | 0 | 0 | 1 | 0 | 0 | 1 | hsa-miR-663  | -0.18 | N/A | Sites in UTR |
| FLYWCH1  | NM_032296    | FLYWCH-type zinc finger 1                                                                              | 0 | 0 | 0 | 0 | 1 | 0 | 0 | 1 | hsa-miR-1908 | -0.18 | N/A | Sites in UTR |
| KCNGB4   | NM_172347    | potassium voltage-gated channel, subfamily G, member 4                                                 | 0 | 0 | 0 | 0 | 1 | 0 | 0 | 1 | hsa-miR-1908 | -0.18 | N/A | Sites in UTR |
| SLC25A45 | NM_001077241 | solute carrier family 25, member 45                                                                    | 0 | 0 | 0 | 0 | 1 | 0 | 0 | 1 | hsa-miR-1908 | -0.18 | N/A | Sites in UTR |
| HSD17B13 | NM_001136230 | hydroxysteroid (17-beta) dehydrogenase 13                                                              | 0 | 0 | 0 | 0 | 1 | 0 | 0 | 1 | hsa-miR-663  | -0.18 | N/A | Sites in UTR |
| ADAP1    | NM_006869    | ArfGAP with dual PH domains 1                                                                          | 0 | 0 | 0 | 0 | 1 | 0 | 1 | 0 | hsa-miR-1908 | -0.18 | N/A | Sites in UTR |
| NAT15    | NM_001083600 | N-acetyltransferase 15 (GCN5-related, putative)                                                        | 0 | 0 | 0 | 0 | 1 | 0 | 1 | 0 | hsa-miR-663  | -0.18 | N/A | Sites in UTR |
| CNGB1    | NM_001297    | cyclic nucleotide gated channel beta 1                                                                 | 0 | 0 | 0 | 0 | 1 | 0 | 0 | 1 | hsa-miR-1908 | -0.18 | N/A | Sites in UTR |
| RPS6KB2  | NM_003952    | ribosomal protein S6 kinase, 70kDa, polypeptide 2                                                      | 0 | 0 | 0 | 0 | 1 | 0 | 0 | 1 | hsa-miR-1908 | -0.18 | N/A | Sites in UTR |
| CACNA1H  | NM_001005407 | calcium channel, voltage-dependent, T type, alpha 1H subunit                                           | 0 | 0 | 0 | 0 | 1 | 0 | 0 | 1 | hsa-miR-663  | -0.18 | N/A | Sites in UTR |
| BRD4     | NM_058243    | bromodomain containing 4                                                                               | 0 | 0 | 0 | 0 | 1 | 0 | 0 | 1 | hsa-miR-1908 | -0.18 | N/A | Sites in UTR |
| PCDH811  | NM_018931    | protocadherin beta 11                                                                                  | 0 | 0 | 0 | 0 | 1 | 0 | 0 | 1 | hsa-miR-1908 | -0.18 | N/A | Sites in UTR |
| MLLT1    | NM_005934    | myeloid/lymphoid or mixed-lineage leukemia (trithorax homolog, <i>Drosophila</i> ); translocated to, 1 | 0 | 0 | 0 | 0 | 1 | 0 | 1 | 0 | hsa-miR-1908 | -0.18 | N/A | Sites in UTR |
| PAFAH1B1 | NM_000430    | platelet-activating factor acetylhydrolase 1b, regulatory subunit 1 (45kDa)                            | 0 | 0 | 0 | 0 | 1 | 0 | 1 | 0 | hsa-miR-1908 | -0.18 | N/A | Sites in UTR |
| AKAP11   | NM_016248    | A kinase (PRKA) anchor protein 11                                                                      | 0 | 0 | 0 | 0 | 1 | 0 | 1 | 0 | hsa-miR-663  | -0.18 | N/A | Sites in UTR |
| SLC9A8   | NM_015266    | solute carrier family 9 (sodium/hydrogen exchanger), member 8                                          | 0 | 0 | 0 | 0 | 1 | 0 | 1 | 0 | hsa-miR-1908 | -0.18 | N/A | Sites in UTR |

|              |              |                                                                   |   |   |   |   |   |   |   |   |              |       |     |              |
|--------------|--------------|-------------------------------------------------------------------|---|---|---|---|---|---|---|---|--------------|-------|-----|--------------|
| TP53INP1     | NM_001135733 | tumor protein p53 inducible nuclear protein 1                     | 0 | 0 | 0 | 0 | 1 | 0 | 0 | 1 | hsa-miR-1908 | -0.17 | N/A | Sites in UTR |
| C9orf91      | NM_153045    | chromosome 9 open reading frame 91                                | 0 | 0 | 0 | 0 | 1 | 1 | 0 | 0 | hsa-miR-663  | -0.17 | N/A | Sites in UTR |
| OBFC2A       | NM_001031716 | oligonucleotide/oligosaccharide-binding fold containing 2A        | 0 | 0 | 0 | 0 | 1 | 0 | 0 | 1 | hsa-miR-1908 | -0.17 | N/A | Sites in UTR |
| GLG1         | NM_001145666 | golgi glycoprotein 1                                              | 0 | 0 | 0 | 0 | 2 | 0 | 0 | 2 | hsa-miR-1908 | -0.17 | N/A | Sites in UTR |
| SRC          | NM_005417    | v-src sarcoma (Schmidt-Ruppin A-2) viral oncogene homolog (avian) | 0 | 0 | 0 | 0 | 1 | 0 | 1 | 0 | hsa-miR-663  | -0.17 | N/A | Sites in UTR |
| USP2         | NM_004205    | ubiquitin specific peptidase 2                                    | 0 | 0 | 0 | 0 | 1 | 0 | 1 | 0 | hsa-miR-1908 | -0.17 | N/A | Sites in UTR |
| RASA3        | NM_007368    | RAS p21 protein activator 3                                       | 0 | 0 | 0 | 0 | 1 | 0 | 1 | 0 | hsa-miR-663  | -0.17 | N/A | Sites in UTR |
| WWC3         | NM_015691    | WWC family member 3                                               | 0 | 0 | 0 | 0 | 1 | 0 | 1 | 0 | hsa-miR-663  | -0.17 | N/A | Sites in UTR |
| C15orf52     | NM_207380    | chromosome 15 open reading frame 52                               | 0 | 0 | 0 | 0 | 1 | 0 | 1 | 0 | hsa-miR-1908 | -0.17 | N/A | Sites in UTR |
| RXRA         | NM_002957    | retinoid X receptor, alpha                                        | 0 | 0 | 0 | 0 | 2 | 0 | 2 | 0 | hsa-miR-1908 | -0.17 | N/A | Sites in UTR |
| NSUN7        | NM_024677    | NOP2/Sun domain family, member 7                                  | 0 | 0 | 0 | 0 | 1 | 0 | 0 | 1 | hsa-miR-1908 | -0.17 | N/A | Sites in UTR |
| BCL2L15      | NM_001010922 | BCL2-like 15                                                      | 0 | 0 | 0 | 0 | 1 | 0 | 0 | 1 | hsa-miR-1908 | -0.17 | N/A | Sites in UTR |
| SOCS3        | NM_003955    | suppressor of cytokine signaling 3                                | 0 | 0 | 0 | 0 | 1 | 0 | 1 | 0 | hsa-miR-1908 | -0.17 | N/A | Sites in UTR |
| ZNF618       | NM_133374    | zinc finger protein 618                                           | 0 | 0 | 0 | 0 | 2 | 1 | 1 | 0 | hsa-miR-1908 | -0.17 | N/A | Sites in UTR |
| VPS13C       | NM_017684    | vacuolar protein sorting 13 homolog C (S. cerevisiae)             | 0 | 0 | 0 | 0 | 1 | 0 | 0 | 1 | hsa-miR-663  | -0.17 | N/A | Sites in UTR |
| MTMR10       | NM_017762    | myotubularin related protein 10                                   | 0 | 0 | 0 | 0 | 1 | 0 | 0 | 1 | hsa-miR-663  | -0.17 | N/A | Sites in UTR |
| SLMO1        | NM_001142405 | slowmo homolog 1 (Drosophila)                                     | 0 | 0 | 0 | 0 | 1 | 0 | 1 | 0 | hsa-miR-663  | -0.17 | N/A | Sites in UTR |
| CYP46A1      | NM_006668    | cytochrome P450, family 46, subfamily A, polypeptide 1            | 0 | 0 | 0 | 0 | 1 | 0 | 1 | 0 | hsa-miR-1908 | -0.17 | N/A | Sites in UTR |
| PTCD1        | NM_015545    | pentatricopeptide repeat domain 1                                 | 0 | 0 | 0 | 0 | 1 | 0 | 1 | 0 | hsa-miR-1908 | -0.17 | N/A | Sites in UTR |
| ATP5J2-PTCD1 | NM_001198879 | ATP5J2-PTCD1 readthrough                                          | 0 | 0 | 0 | 0 | 1 | 0 | 1 | 0 | hsa-miR-1908 | -0.17 | N/A | Sites in UTR |



|          |              |                                                                               |   |   |   |   |   |   |   |   |              |       |     |              |
|----------|--------------|-------------------------------------------------------------------------------|---|---|---|---|---|---|---|---|--------------|-------|-----|--------------|
| PIK3R2   | NM_005027    | phosphoinositide-3-kinase, regulatory subunit 2 (beta)                        | 0 | 0 | 0 | 0 | 1 | 0 | 0 | 1 | hsa-miR-663  | -0.17 | N/A | Sites in UTR |
| TECPR1   | NM_015395    | tectonin beta-propeller repeat containing 1                                   | 0 | 0 | 0 | 0 | 1 | 0 | 0 | 1 | hsa-miR-663  | -0.17 | N/A | Sites in UTR |
| SPATS2L  | NM_001100422 | spermatogenesis associated, serine-rich 2-like                                | 0 | 0 | 0 | 0 | 1 | 0 | 0 | 1 | hsa-miR-663  | -0.17 | N/A | Sites in UTR |
| SDF4     | NM_016176    | stromal cell derived factor 4                                                 | 0 | 0 | 0 | 0 | 1 | 0 | 0 | 1 | hsa-miR-663  | -0.17 | N/A | Sites in UTR |
| TMEM222  | NM_032125    | transmembrane protein 222                                                     | 0 | 0 | 0 | 0 | 1 | 0 | 0 | 1 | hsa-miR-663  | -0.17 | N/A | Sites in UTR |
| SLC29A4  | NM_001040661 | solute carrier family 29 (nucleoside transporters), member 4                  | 0 | 0 | 0 | 0 | 2 | 0 | 1 | 1 | hsa-miR-663  | -0.17 | N/A | Sites in UTR |
| PURB     | NM_033224    | purine-rich element binding protein B                                         | 0 | 0 | 0 | 0 | 1 | 0 | 1 | 0 | hsa-miR-663  | -0.17 | N/A | Sites in UTR |
| KIF3A    | NM_007054    | kinesin family member 3A                                                      | 0 | 0 | 0 | 0 | 1 | 0 | 1 | 0 | hsa-miR-663  | -0.17 | N/A | Sites in UTR |
| EHMT1    | NM_024757    | euchromatic histone-lysine N-methyltransferase 1                              | 0 | 0 | 0 | 0 | 1 | 0 | 1 | 0 | hsa-miR-663  | -0.17 | N/A | Sites in UTR |
| ATP6V0E2 | NM_001100592 | ATPase, H+ transporting V0 subunit e2                                         | 0 | 0 | 0 | 0 | 1 | 0 | 1 | 0 | hsa-miR-1908 | -0.17 | N/A | Sites in UTR |
| TAF1C    | NM_005679    | TATA box binding protein (TBP)-associated factor, RNA polymerase I, C, 110kDa | 0 | 0 | 0 | 0 | 1 | 0 | 0 | 1 | hsa-miR-663  | -0.17 | N/A | Sites in UTR |
| HOXB6    | NM_018952    | homeobox B6                                                                   | 0 | 0 | 0 | 0 | 1 | 0 | 1 | 0 | hsa-miR-1908 | -0.17 | N/A | Sites in UTR |
| SMG7     | NM_001174061 | smg-7 homolog, nonsense mediated mRNA decay factor (C. elegans)               | 0 | 0 | 0 | 0 | 1 | 0 | 1 | 0 | hsa-miR-1908 | -0.17 | N/A | Sites in UTR |
| GLB1L2   | NM_138342    | galactosidase, beta 1-like 2                                                  | 0 | 0 | 0 | 0 | 1 | 0 | 1 | 0 | hsa-miR-1908 | -0.17 | N/A | Sites in UTR |
| KIAA1143 | NM_020696    | KIAA1143                                                                      | 0 | 0 | 0 | 0 | 1 | 0 | 0 | 1 | hsa-miR-1908 | -0.17 | N/A | Sites in UTR |
| C6orf25  | NM_025260    | chromosome 6 open reading frame 25                                            | 0 | 0 | 0 | 0 | 1 | 0 | 0 | 1 | hsa-miR-663  | -0.17 | N/A | Sites in UTR |
| HOXC6    | NM_004503    | homeobox C6                                                                   | 0 | 0 | 0 | 0 | 1 | 0 | 1 | 0 | hsa-miR-663  | -0.17 | N/A | Sites in UTR |
| NFASC    | NM_001005388 | neurofascin                                                                   | 0 | 0 | 0 | 0 | 1 | 0 | 1 | 0 | hsa-miR-1908 | -0.17 | N/A | Sites in UTR |
| ZNF850   | NM_001193552 | zinc finger protein 850                                                       | 0 | 0 | 0 | 0 | 2 | 0 | 1 | 1 | hsa-miR-1908 | -0.17 | N/A | Sites in UTR |
| NANOG    | NM_024865    | Nanog homeobox                                                                | 0 | 0 | 0 | 0 | 1 | 0 | 0 | 1 | hsa-miR-663  | -0.17 | N/A | Sites in UTR |

|           |              |                                                                       |   |   |   |   |   |   |   |   |              |       |     |              |
|-----------|--------------|-----------------------------------------------------------------------|---|---|---|---|---|---|---|---|--------------|-------|-----|--------------|
| RRP1B     | NM_015056    | ribosomal RNA processing 1 homolog B ( <i>S. cerevisiae</i> )         | 0 | 0 | 0 | 0 | 1 | 0 | 1 | 0 | hsa-miR-663  | -0.17 | N/A | Sites in UTR |
| CPLX2     | NM_001008220 | complexin 2                                                           | 0 | 0 | 0 | 0 | 2 | 1 | 1 | 0 | hsa-miR-663  | -0.17 | N/A | Sites in UTR |
| PIK3CD    | NM_005026    | phosphoinositide-3-kinase, catalytic, delta polypeptide               | 0 | 0 | 0 | 0 | 1 | 0 | 0 | 1 | hsa-miR-663  | -0.17 | N/A | Sites in UTR |
| TNFRSF10B | NM_003842    | tumor necrosis factor receptor superfamily, member 10b                | 0 | 0 | 0 | 0 | 1 | 0 | 0 | 1 | hsa-miR-1908 | -0.17 | N/A | Sites in UTR |
| ZNF785    | NM_152458    | zinc finger protein 785                                               | 0 | 0 | 0 | 0 | 1 | 0 | 0 | 1 | hsa-miR-1908 | -0.17 | N/A | Sites in UTR |
| C1orf229  | NM_207401    | chromosome 1 open reading frame 229                                   | 0 | 0 | 0 | 0 | 1 | 0 | 0 | 1 | hsa-miR-663  | -0.17 | N/A | Sites in UTR |
| RYR2      | NM_001035    | ryanodine receptor 2 (cardiac)                                        | 0 | 0 | 0 | 0 | 1 | 0 | 1 | 0 | hsa-miR-663  | -0.17 | N/A | Sites in UTR |
| GPRC5B    | NM_016235    | G protein-coupled receptor, family C, group 5, member B               | 0 | 0 | 0 | 0 | 1 | 0 | 1 | 0 | hsa-miR-1908 | -0.17 | N/A | Sites in UTR |
| ZNF331    | NM_001079906 | zinc finger protein 331                                               | 0 | 0 | 0 | 0 | 1 | 0 | 1 | 0 | hsa-miR-663  | -0.17 | N/A | Sites in UTR |
| ACE       | NM_000789    | angiotensin I converting enzyme (peptidyl-dipeptidase A)<br>1         | 0 | 0 | 0 | 0 | 1 | 0 | 0 | 1 | hsa-miR-663  | -0.17 | N/A | Sites in UTR |
| ZFP30     | NM_014898    | zinc finger protein 30 homolog (mouse)                                | 0 | 0 | 0 | 0 | 1 | 0 | 0 | 1 | hsa-miR-1908 | -0.17 | N/A | Sites in UTR |
| RNF44     | NM_014901    | ring finger protein 44                                                | 0 | 0 | 0 | 0 | 1 | 0 | 0 | 1 | hsa-miR-1908 | -0.17 | N/A | Sites in UTR |
| ZNF609    | NM_015042    | zinc finger protein 609                                               | 0 | 0 | 0 | 0 | 1 | 0 | 1 | 0 | hsa-miR-1908 | -0.17 | N/A | Sites in UTR |
| GLYCK     | NM_145262    | glycerate kinase                                                      | 0 | 0 | 0 | 0 | 1 | 0 | 1 | 0 | hsa-miR-663  | -0.17 | N/A | Sites in UTR |
| GNB1      | NM_002074    | guanine nucleotide binding protein (G protein), beta<br>polypeptide 1 | 0 | 0 | 0 | 0 | 1 | 0 | 1 | 0 | hsa-miR-663  | -0.17 | N/A | Sites in UTR |
| OTX1      | NM_001199770 | orthodenticle homeobox 1                                              | 1 | 0 | 1 | 0 | 0 | 0 | 0 | 0 | hsa-miR-663  | -0.17 | N/A | Sites in UTR |
| SIK1      | NM_173354    | salt-inducible kinase 1                                               | 0 | 0 | 0 | 0 | 1 | 0 | 1 | 0 | hsa-miR-1908 | -0.17 | N/A | Sites in UTR |
| KDM1B     | NM_153042    | lysine (K)-specific demethylase 1B                                    | 0 | 0 | 0 | 0 | 1 | 0 | 1 | 0 | hsa-miR-663  | -0.17 | N/A | Sites in UTR |
| C7        | NM_000587    | complement component 7                                                | 0 | 0 | 0 | 0 | 1 | 0 | 0 | 1 | hsa-miR-1908 | -0.17 | N/A | Sites in UTR |
| EFCAB1    | NM_001142857 | EF-hand calcium binding domain 1                                      | 0 | 0 | 0 | 0 | 1 | 0 | 0 | 1 | hsa-miR-1908 | -0.17 | N/A | Sites in UTR |

|         |              |                                                                                         |   |   |   |   |   |   |   |   |              |       |     |              |
|---------|--------------|-----------------------------------------------------------------------------------------|---|---|---|---|---|---|---|---|--------------|-------|-----|--------------|
| GJB4    | NM_153212    | gap junction protein, beta 4, 30.3kDa                                                   | 0 | 0 | 0 | 0 | 1 | 0 | 0 | 1 | hsa-miR-1908 | -0.17 | N/A | Sites in UTR |
| VCL     | NM_003373    | vinculin                                                                                | 0 | 0 | 0 | 0 | 1 | 0 | 0 | 1 | hsa-miR-1908 | -0.17 | N/A | Sites in UTR |
| KLLN    | NM_001126049 | killin, p53-regulated DNA replication inhibitor                                         | 0 | 0 | 0 | 0 | 1 | 0 | 0 | 1 | hsa-miR-1908 | -0.16 | N/A | Sites in UTR |
| IGDCC3  | NM_004884    | immunoglobulin superfamily, DCC subclass, member 3                                      | 0 | 0 | 0 | 0 | 1 | 0 | 1 | 0 | hsa-miR-1908 | -0.16 | N/A | Sites in UTR |
| SPECC1L | NM_001145468 | sperm antigen with calponin homology and coiled-coil domains 1-like                     | 0 | 0 | 0 | 0 | 1 | 0 | 1 | 0 | hsa-miR-663  | -0.16 | N/A | Sites in UTR |
| LYZ     | NM_000239    | lysozyme                                                                                | 0 | 0 | 0 | 0 | 1 | 0 | 0 | 1 | hsa-miR-1908 | -0.16 | N/A | Sites in UTR |
| SPCS3   | NM_021928    | signal peptidase complex subunit 3 homolog (S. cerevisiae)                              | 0 | 0 | 0 | 0 | 1 | 0 | 0 | 1 | hsa-miR-1908 | -0.16 | N/A | Sites in UTR |
| DNAJB2  | NM_006736    | Dnaj (Hsp40) homolog, subfamily B, member 2                                             | 0 | 0 | 0 | 0 | 1 | 0 | 1 | 0 | hsa-miR-1908 | -0.16 | N/A | Sites in UTR |
| LMNA    | NM_170707    | lamin A/C                                                                               | 0 | 0 | 0 | 0 | 1 | 0 | 1 | 0 | hsa-miR-1908 | -0.16 | N/A | Sites in UTR |
| CHST11  | NM_001173982 | carbohydrate (chondroitin 4) sulfotransferase 11                                        | 0 | 0 | 0 | 0 | 1 | 0 | 1 | 0 | hsa-miR-1908 | -0.16 | N/A | Sites in UTR |
| CD99L2  | NM_001184808 | CD99 molecule-like 2                                                                    | 0 | 0 | 0 | 0 | 1 | 0 | 1 | 0 | hsa-miR-663  | -0.16 | N/A | Sites in UTR |
| CYB5R3  | NM_000398    | cytochrome b5 reductase 3                                                               | 0 | 0 | 0 | 0 | 1 | 0 | 0 | 1 | hsa-miR-663  | -0.16 | N/A | Sites in UTR |
| UBA52   | NM_001033930 | ubiquitin A-52 residue ribosomal protein fusion product 1                               | 0 | 0 | 0 | 0 | 1 | 0 | 0 | 1 | hsa-miR-1908 | -0.16 | N/A | Sites in UTR |
| NSFL1C  | NM_001206736 | NSFL1 (p97) cofactor (p47)                                                              | 0 | 0 | 0 | 0 | 1 | 0 | 0 | 1 | hsa-miR-1908 | -0.16 | N/A | Sites in UTR |
| SPRYD7  | NM_001127482 | SPRY domain containing 7                                                                | 0 | 0 | 0 | 0 | 1 | 0 | 0 | 1 | hsa-miR-1908 | -0.16 | N/A | Sites in UTR |
| PAPOLG  | NM_022894    | poly(A) polymerase gamma                                                                | 0 | 0 | 0 | 0 | 1 | 0 | 0 | 1 | hsa-miR-663  | -0.16 | N/A | Sites in UTR |
| SPPL3   | NM_139015    | signal peptide peptidase-like 3                                                         | 0 | 0 | 0 | 0 | 1 | 0 | 1 | 0 | hsa-miR-663  | -0.16 | N/A | Sites in UTR |
| GNAO1   | NM_020988    | guanine nucleotide binding protein (G protein), alpha activating activity polypeptide O | 0 | 0 | 0 | 0 | 1 | 0 | 0 | 1 | hsa-miR-663  | -0.16 | N/A | Sites in UTR |
| AASS    | NM_005763    | aminoadipate-semialdehyde synthase                                                      | 0 | 0 | 0 | 0 | 1 | 0 | 0 | 1 | hsa-miR-663  | -0.16 | N/A | Sites in UTR |
| HIF3A   | NM_022462    | hypoxia inducible factor 3, alpha subunit                                               | 0 | 0 | 0 | 0 | 1 | 0 | 0 | 1 | hsa-miR-663  | -0.16 | N/A | Sites in UTR |

|          |              |                                                                                  |   |   |   |   |   |   |   |   |              |       |     |              |
|----------|--------------|----------------------------------------------------------------------------------|---|---|---|---|---|---|---|---|--------------|-------|-----|--------------|
| CDK18    | NM_002596    | cyclin-dependent kinase 18                                                       | 0 | 0 | 0 | 0 | 1 | 0 | 1 | 0 | hsa-miR-1908 | -0.16 | N/A | Sites in UTR |
| LETM1    | NM_012318    | leucine zipper-EF-hand containing transmembrane protein 1                        | 0 | 0 | 0 | 0 | 1 | 0 | 0 | 1 | hsa-miR-1908 | -0.16 | N/A | Sites in UTR |
| LEPROT   | NM_001198681 | leptin receptor overlapping transcript                                           | 0 | 0 | 0 | 0 | 1 | 0 | 0 | 1 | hsa-miR-663  | -0.16 | N/A | Sites in UTR |
| IL28RA   | NM_170743    | interleukin 28 receptor, alpha (interferon, lambda receptor)                     | 0 | 0 | 0 | 0 | 1 | 0 | 0 | 1 | hsa-miR-1908 | -0.16 | N/A | Sites in UTR |
| SC4MOL   | NM_001017369 | sterol-C4-methyl oxidase-like                                                    | 0 | 0 | 0 | 0 | 1 | 0 | 0 | 1 | hsa-miR-1908 | -0.16 | N/A | Sites in UTR |
| NOL9     | NM_024654    | nucleolar protein 9                                                              | 0 | 0 | 0 | 0 | 1 | 0 | 0 | 1 | hsa-miR-1908 | -0.16 | N/A | Sites in UTR |
| ZNF814   | NM_001144989 | zinc finger protein 814                                                          | 0 | 0 | 0 | 0 | 1 | 0 | 0 | 1 | hsa-miR-1908 | -0.16 | N/A | Sites in UTR |
| SOX11    | NM_003108    | SRY (sex determining region Y)-box 11                                            | 0 | 0 | 0 | 0 | 2 | 0 | 2 | 0 | hsa-miR-1908 | -0.16 | N/A | Sites in UTR |
| FLT4     | NM_182925    | fms-related tyrosine kinase 4                                                    | 0 | 0 | 0 | 0 | 1 | 0 | 1 | 0 | hsa-miR-1908 | -0.16 | N/A | Sites in UTR |
| NEURL1B  | NM_001142651 | neuralized homolog 1B (Drosophila)                                               | 0 | 0 | 0 | 0 | 1 | 0 | 1 | 0 | hsa-miR-663  | -0.16 | N/A | Sites in UTR |
| NAA40    | NM_024771    | N(alpha)-acetyltransferase 40, NatD catalytic subunit, homolog (S. cerevisiae)   | 0 | 0 | 0 | 0 | 1 | 0 | 0 | 1 | hsa-miR-1908 | -0.16 | N/A | Sites in UTR |
| AAK1     | NM_014911    | AP2 associated kinase 1                                                          | 0 | 0 | 0 | 0 | 2 | 0 | 1 | 1 | hsa-miR-663  | -0.16 | N/A | Sites in UTR |
| STAT3    | NM_003150    | signal transducer and activator of transcription 3 (acute-phase response factor) | 0 | 0 | 0 | 0 | 1 | 0 | 1 | 0 | hsa-miR-1908 | -0.16 | N/A | Sites in UTR |
| C22orf13 | NM_031444    | chromosome 22 open reading frame 13                                              | 0 | 0 | 0 | 0 | 1 | 0 | 1 | 0 | hsa-miR-663  | -0.16 | N/A | Sites in UTR |
| ZBTB46   | NM_025224    | zinc finger and BTB domain containing 46                                         | 0 | 0 | 0 | 0 | 1 | 0 | 1 | 0 | hsa-miR-1908 | -0.16 | N/A | Sites in UTR |
| C11orf87 | NM_207645    | chromosome 11 open reading frame 87                                              | 0 | 0 | 0 | 0 | 1 | 0 | 1 | 0 | hsa-miR-1908 | -0.16 | N/A | Sites in UTR |
| ABL1     | NM_005157    | c-abl oncogene 1, non-receptor tyrosine kinase                                   | 0 | 0 | 0 | 0 | 1 | 0 | 0 | 1 | hsa-miR-1908 | -0.16 | N/A | Sites in UTR |
| DPP6     | NM_001039350 | dipeptidyl-peptidase 6                                                           | 0 | 0 | 0 | 0 | 1 | 0 | 0 | 1 | hsa-miR-663  | -0.16 | N/A | Sites in UTR |
| DENR     | NM_003677    | density-regulated protein                                                        | 0 | 0 | 0 | 0 | 1 | 0 | 0 | 1 | hsa-miR-1908 | -0.16 | N/A | Sites in UTR |
| PHOX2B   | NM_003924    | paired-like homeobox 2b                                                          | 0 | 0 | 0 | 0 | 1 | 0 | 0 | 1 | hsa-miR-1908 | -0.16 | N/A | Sites in UTR |

|          |              |                                                             |   |   |   |   |   |   |   |   |              |       |     |              |
|----------|--------------|-------------------------------------------------------------|---|---|---|---|---|---|---|---|--------------|-------|-----|--------------|
| CCDC122  | NM_144974    | coiled-coil domain containing 122                           | 0 | 0 | 0 | 0 | 1 | 0 | 0 | 1 | hsa-miR-1908 | -0.16 | N/A | Sites in UTR |
| RAPGEF3  | NM_001098531 | Rap guanine nucleotide exchange factor (GEF) 3              | 0 | 0 | 0 | 0 | 1 | 0 | 1 | 0 | hsa-miR-663  | -0.16 | N/A | Sites in UTR |
| KIAA1161 | NM_020702    | KIAA1161                                                    | 0 | 0 | 0 | 0 | 1 | 0 | 1 | 0 | hsa-miR-1908 | -0.16 | N/A | Sites in UTR |
| SLC6A14  | NM_007231    | solute carrier family 6 (amino acid transporter), member 14 | 0 | 0 | 0 | 0 | 1 | 0 | 0 | 1 | hsa-miR-1908 | -0.16 | N/A | Sites in UTR |
| TMEM41B  | NM_015012    | transmembrane protein 41B                                   | 0 | 0 | 0 | 0 | 1 | 0 | 0 | 1 | hsa-miR-663  | -0.16 | N/A | Sites in UTR |
| CCNG2    | NM_004354    | cyclin G2                                                   | 0 | 0 | 0 | 0 | 1 | 1 | 0 | 0 | hsa-miR-1908 | -0.16 | N/A | Sites in UTR |
| SOX13    | NM_005686    | SRY (sex determining region Y)-box 13                       | 0 | 0 | 0 | 0 | 1 | 0 | 1 | 0 | hsa-miR-663  | -0.16 | N/A | Sites in UTR |
| CEP63    | NM_001042383 | centrosomal protein 63kDa                                   | 0 | 0 | 0 | 0 | 1 | 0 | 1 | 0 | hsa-miR-1908 | -0.16 | N/A | Sites in UTR |
| POLR2E   | NM_002695    | polymerase (RNA) II (DNA directed) polypeptide E, 25kDa     | 0 | 0 | 0 | 0 | 1 | 0 | 1 | 0 | hsa-miR-663  | -0.15 | N/A | Sites in UTR |
| C9orf7   | NM_001135775 | chromosome 9 open reading frame 7                           | 0 | 0 | 0 | 0 | 1 | 0 | 1 | 0 | hsa-miR-1908 | -0.15 | N/A | Sites in UTR |
| ATP8B2   | NM_020452    | ATPase, class I, type 8B, member 2                          | 0 | 0 | 0 | 0 | 1 | 0 | 1 | 0 | hsa-miR-663  | -0.15 | N/A | Sites in UTR |
| L3MBTL2  | NM_031488    | l(3)mbt-like 2 (Drosophila)                                 | 0 | 0 | 0 | 0 | 1 | 0 | 0 | 1 | hsa-miR-663  | -0.15 | N/A | Sites in UTR |
| SFXN1    | NM_022754    | sideroflexin 1                                              | 0 | 0 | 0 | 0 | 1 | 0 | 0 | 1 | hsa-miR-663  | -0.15 | N/A | Sites in UTR |
| PLA2G4E  | NM_001206670 | phospholipase A2, group IVE                                 | 0 | 0 | 0 | 0 | 1 | 0 | 0 | 1 | hsa-miR-1908 | -0.15 | N/A | Sites in UTR |
| CDC42BPB | NM_006035    | CDC42 binding protein kinase beta (DMPK-like)               | 0 | 0 | 0 | 0 | 1 | 0 | 1 | 0 | hsa-miR-1908 | -0.15 | N/A | Sites in UTR |
| WTIP     | NM_001080436 | Wilms tumor 1 interacting protein                           | 0 | 0 | 0 | 0 | 1 | 0 | 1 | 0 | hsa-miR-1908 | -0.15 | N/A | Sites in UTR |
| GOSR1    | NM_001007024 | golgi SNAP receptor complex member 1                        | 0 | 0 | 0 | 0 | 3 | 0 | 3 | 0 | hsa-miR-1908 | -0.15 | N/A | Sites in UTR |
| ATG13    | NM_001142673 | ATG13 autophagy related 13 homolog (S. cerevisiae)          | 0 | 0 | 0 | 0 | 1 | 0 | 1 | 0 | hsa-miR-1908 | -0.15 | N/A | Sites in UTR |
| EMX1     | NM_004097    | empty spiracles homeobox 1                                  | 0 | 0 | 0 | 0 | 1 | 0 | 0 | 1 | hsa-miR-663  | -0.15 | N/A | Sites in UTR |
| KIAA0825 | NM_001145678 | KIAA0825                                                    | 0 | 0 | 0 | 0 | 1 | 0 | 0 | 1 | hsa-miR-663  | -0.15 | N/A | Sites in UTR |

|           |              |                                                                   |   |   |   |   |   |   |   |   |              |       |     |              |
|-----------|--------------|-------------------------------------------------------------------|---|---|---|---|---|---|---|---|--------------|-------|-----|--------------|
| TBC1D24   | NM_001199107 | TBC1 domain family, member 24                                     | 0 | 0 | 0 | 0 | 2 | 0 | 2 | 0 | hsa-miR-663  | -0.15 | N/A | Sites in UTR |
| PFKFB3    | NM_001145443 | 6-phosphofructo-2-kinase/fructose-2,6-biphosphatase 3             | 0 | 0 | 0 | 0 | 1 | 0 | 1 | 0 | hsa-miR-1908 | -0.15 | N/A | Sites in UTR |
| MAPK1IP1L | NM_144578    | mitogen-activated protein kinase 1 interacting protein 1-like     | 0 | 0 | 0 | 0 | 2 | 0 | 0 | 2 | hsa-miR-1908 | -0.15 | N/A | Sites in UTR |
| MSI2      | NM_170721    | musashi homolog 2 (Drosophila)                                    | 0 | 0 | 0 | 0 | 1 | 0 | 1 | 0 | hsa-miR-1908 | -0.15 | N/A | Sites in UTR |
| FGF1      | NM_000800    | fibroblast growth factor 1 (acidic)                               | 0 | 0 | 0 | 0 | 1 | 0 | 0 | 1 | hsa-miR-1908 | -0.15 | N/A | Sites in UTR |
| ESPNL     | NM_194312    | espin-like                                                        | 0 | 0 | 0 | 0 | 1 | 0 | 0 | 1 | hsa-miR-663  | -0.15 | N/A | Sites in UTR |
| RPTOR     | NM_001163034 | regulatory associated protein of MTOR, complex 1                  | 0 | 0 | 0 | 0 | 1 | 0 | 1 | 0 | hsa-miR-1908 | -0.15 | N/A | Sites in UTR |
| ZNF345    | NM_001242472 | zinc finger protein 345                                           | 0 | 0 | 0 | 0 | 1 | 0 | 0 | 1 | hsa-miR-663  | -0.15 | N/A | Sites in UTR |
| NXN       | NM_001205319 | nucleoredoxin                                                     | 0 | 0 | 0 | 0 | 1 | 0 | 0 | 1 | hsa-miR-1908 | -0.15 | N/A | Sites in UTR |
| DGCR14    | NM_022719    | DiGeorge syndrome critical region gene 14                         | 0 | 0 | 0 | 0 | 1 | 0 | 1 | 0 | hsa-miR-663  | -0.15 | N/A | Sites in UTR |
| TNKS      | NM_003747    | tankyrase, TRF1-interacting ankyrin-related ADP-ribose polymerase | 0 | 0 | 0 | 0 | 1 | 0 | 1 | 0 | hsa-miR-663  | -0.15 | N/A | Sites in UTR |
| SLC35E1   | NM_024881    | solute carrier family 35, member E1                               | 0 | 0 | 0 | 0 | 1 | 0 | 1 | 0 | hsa-miR-663  | -0.15 | N/A | Sites in UTR |
| NTNG2     | NM_032536    | netrin G2                                                         | 0 | 0 | 0 | 0 | 2 | 0 | 2 | 0 | hsa-miR-1908 | -0.15 | N/A | Sites in UTR |
| ADAMTS17  | NM_139057    | ADAM metallopeptidase with thrombospondin type 1 motif, 17        | 0 | 0 | 0 | 0 | 1 | 0 | 1 | 0 | hsa-miR-663  | -0.15 | N/A | Sites in UTR |
| EFHD2     | NM_024329    | EF-hand domain family, member D2                                  | 0 | 0 | 0 | 0 | 1 | 0 | 0 | 1 | hsa-miR-663  | -0.15 | N/A | Sites in UTR |
| NUAK2     | NM_030952    | NUAK family, SNF1-like kinase, 2                                  | 0 | 0 | 0 | 0 | 1 | 0 | 0 | 1 | hsa-miR-1908 | -0.15 | N/A | Sites in UTR |
| USP6      | NM_004505    | ubiquitin specific peptidase 6 (Tre-2 oncogene)                   | 0 | 0 | 0 | 0 | 1 | 0 | 1 | 0 | hsa-miR-663  | -0.15 | N/A | Sites in UTR |
| GATAD2A   | NM_017660    | GATA zinc finger domain containing 2A                             | 0 | 0 | 0 | 0 | 1 | 0 | 1 | 0 | hsa-miR-1908 | -0.15 | N/A | Sites in UTR |
| TMEM8A    | NM_021259    | transmembrane protein 8A                                          | 0 | 0 | 0 | 0 | 1 | 0 | 1 | 0 | hsa-miR-663  | -0.15 | N/A | Sites in UTR |
| TSPAN14   | NM_001128309 | tetraspanin 14                                                    | 0 | 0 | 0 | 0 | 1 | 0 | 1 | 0 | hsa-miR-663  | -0.15 | N/A | Sites in UTR |

|           |              |                                                                     |   |   |   |   |   |   |   |   |              |       |     |              |
|-----------|--------------|---------------------------------------------------------------------|---|---|---|---|---|---|---|---|--------------|-------|-----|--------------|
| SORCS3    | NM_014978    | sortilin-related VPS10 domain containing receptor 3                 | 0 | 0 | 0 | 0 | 1 | 0 | 0 | 1 | hsa-miR-663  | -0.15 | N/A | Sites in UTR |
| C14orf43  | NM_001043318 | chromosome 14 open reading frame 43                                 | 0 | 0 | 0 | 0 | 1 | 0 | 0 | 1 | hsa-miR-1908 | -0.15 | N/A | Sites in UTR |
| CX3CL1    | NM_002996    | chemokine (C-X3-C motif) ligand 1                                   | 0 | 0 | 0 | 0 | 1 | 0 | 1 | 0 | hsa-miR-663  | -0.15 | N/A | Sites in UTR |
| SERPINB9  | NM_004155    | serpin peptidase inhibitor, clade B (ovalbumin), member 9           | 0 | 0 | 0 | 0 | 1 | 0 | 0 | 1 | hsa-miR-663  | -0.15 | N/A | Sites in UTR |
| C17orf101 | NM_024648    | chromosome 17 open reading frame 101                                | 0 | 0 | 0 | 0 | 1 | 0 | 0 | 1 | hsa-miR-663  | -0.15 | N/A | Sites in UTR |
| PPM1E     | NM_014906    | protein phosphatase, Mg2+/Mn2+ dependent, 1E                        | 0 | 0 | 0 | 0 | 1 | 0 | 1 | 0 | hsa-miR-1908 | -0.15 | N/A | Sites in UTR |
| INO80D    | NM_017759    | INO80 complex subunit D                                             | 0 | 0 | 0 | 0 | 1 | 0 | 1 | 0 | hsa-miR-1908 | -0.15 | N/A | Sites in UTR |
| OR2C3     | NM_198074    | olfactory receptor, family 2, subfamily C, member 3                 | 0 | 0 | 0 | 0 | 1 | 0 | 1 | 0 | hsa-miR-663  | -0.15 | N/A | Sites in UTR |
| TMEM154   | NM_152680    | transmembrane protein 154                                           | 0 | 0 | 0 | 0 | 1 | 0 | 0 | 1 | hsa-miR-1908 | -0.15 | N/A | Sites in UTR |
| DBH       | NM_000787    | dopamine beta-hydroxylase (dopamine beta-monoxygenase)              | 0 | 0 | 0 | 0 | 1 | 0 | 1 | 0 | hsa-miR-663  | -0.14 | N/A | Sites in UTR |
| ZNF516    | NM_014643    | zinc finger protein 516                                             | 0 | 0 | 0 | 0 | 1 | 0 | 1 | 0 | hsa-miR-1908 | -0.14 | N/A | Sites in UTR |
| WASF2     | NM_001201404 | WAS protein family, member 2                                        | 0 | 0 | 0 | 0 | 1 | 0 | 1 | 0 | hsa-miR-663  | -0.14 | N/A | Sites in UTR |
| SLC2A3    | NM_006931    | solute carrier family 2 (facilitated glucose transporter), member 3 | 0 | 0 | 0 | 0 | 1 | 0 | 0 | 1 | hsa-miR-1908 | -0.14 | N/A | Sites in UTR |
| WNT3A     | NM_033131    | wingless-type MMTV integration site family, member 3A               | 0 | 0 | 0 | 0 | 1 | 0 | 1 | 0 | hsa-miR-663  | -0.14 | N/A | Sites in UTR |
| MKI67     | NM_001145966 | antigen identified by monoclonal antibody Ki-67                     | 0 | 0 | 0 | 0 | 1 | 0 | 0 | 1 | hsa-miR-1908 | -0.14 | N/A | Sites in UTR |
| C1orf115  | NM_024709    | chromosome 1 open reading frame 115                                 | 0 | 0 | 0 | 0 | 1 | 0 | 0 | 1 | hsa-miR-1908 | -0.14 | N/A | Sites in UTR |
| CSNK1E    | NM_001894    | casein kinase 1, epsilon                                            | 0 | 0 | 0 | 0 | 1 | 0 | 1 | 0 | hsa-miR-663  | -0.14 | N/A | Sites in UTR |
| ZNF697    | NM_001080470 | zinc finger protein 697                                             | 0 | 0 | 0 | 0 | 1 | 0 | 1 | 0 | hsa-miR-663  | -0.14 | N/A | Sites in UTR |
| KIAA1549  | NM_001164665 | KIAA1549                                                            | 0 | 0 | 0 | 0 | 1 | 1 | 0 | 0 | hsa-miR-1908 | -0.14 | N/A | Sites in UTR |
| KLHL30    | NM_198582    | kelch-like 30 (Drosophila)                                          | 0 | 0 | 0 | 0 | 1 | 0 | 1 | 0 | hsa-miR-663  | -0.14 | N/A | Sites in UTR |

|          |              |                                                                               |   |   |   |   |   |   |   |   |              |       |     |              |
|----------|--------------|-------------------------------------------------------------------------------|---|---|---|---|---|---|---|---|--------------|-------|-----|--------------|
| IRAK4    | NM_001114182 | interleukin-1 receptor-associated kinase 4                                    | 0 | 0 | 0 | 0 | 1 | 0 | 0 | 1 | hsa-miR-1908 | -0.14 | N/A | Sites in UTR |
| TXNL4B   | NM_001142317 | thioredoxin-like 4B                                                           | 0 | 0 | 0 | 0 | 1 | 0 | 0 | 1 | hsa-miR-663  | -0.14 | N/A | Sites in UTR |
| NLRC3    | NM_178844    | NLR family, CARD domain containing 3                                          | 0 | 0 | 0 | 0 | 1 | 0 | 0 | 1 | hsa-miR-1908 | -0.14 | N/A | Sites in UTR |
| LRRC14   | NM_014665    | leucine rich repeat containing 14                                             | 0 | 0 | 0 | 0 | 1 | 0 | 1 | 0 | hsa-miR-1908 | -0.14 | N/A | Sites in UTR |
| TMEM132B | NM_052907    | transmembrane protein 132B                                                    | 0 | 0 | 0 | 0 | 1 | 0 | 1 | 0 | hsa-miR-1908 | -0.14 | N/A | Sites in UTR |
| PLEKHG1  | NM_001029884 | pleckstrin homology domain containing, family G (with RhoGef domain) member 1 | 0 | 0 | 0 | 0 | 1 | 0 | 0 | 1 | hsa-miR-1908 | -0.14 | N/A | Sites in UTR |
| ERLIN2   | NM_007175    | ER lipid raft associated 2                                                    | 0 | 0 | 0 | 0 | 1 | 1 | 0 | 0 | hsa-miR-663  | -0.14 | N/A | Sites in UTR |
| RUNX3    | NM_001031680 | runt-related transcription factor 3                                           | 0 | 0 | 0 | 0 | 1 | 0 | 1 | 0 | hsa-miR-663  | -0.14 | N/A | Sites in UTR |
| LDLRAP1  | NM_015627    | low density lipoprotein receptor adaptor protein 1                            | 0 | 0 | 0 | 0 | 1 | 0 | 1 | 0 | hsa-miR-1908 | -0.14 | N/A | Sites in UTR |
| SYVN1    | NM_032431    | synovial apoptosis inhibitor 1, synoviolin                                    | 0 | 0 | 0 | 0 | 1 | 0 | 1 | 0 | hsa-miR-663  | -0.14 | N/A | Sites in UTR |
| SHANK3   | NM_001080420 | SH3 and multiple ankyrin repeat domains 3                                     | 0 | 0 | 0 | 0 | 1 | 0 | 1 | 0 | hsa-miR-1908 | -0.14 | N/A | Sites in UTR |
| GPR107   | NM_001136557 | G protein-coupled receptor 107                                                | 0 | 0 | 0 | 0 | 1 | 0 | 1 | 0 | hsa-miR-1908 | -0.14 | N/A | Sites in UTR |
| SERTAD2  | NM_014755    | SERTA domain containing 2                                                     | 0 | 0 | 0 | 0 | 1 | 0 | 0 | 1 | hsa-miR-663  | -0.14 | N/A | Sites in UTR |
| LZTS1    | NM_021020    | leucine zipper, putative tumor suppressor 1                                   | 0 | 0 | 0 | 0 | 2 | 0 | 2 | 0 | hsa-miR-663  | -0.14 | N/A | Sites in UTR |
| ZNF395   | NM_018660    | zinc finger protein 395                                                       | 0 | 0 | 0 | 0 | 1 | 0 | 1 | 0 | hsa-miR-1908 | -0.14 | N/A | Sites in UTR |
| MTHFSD   | NM_001159377 | methenyltetrahydrofolate synthetase domain containing                         | 0 | 0 | 0 | 0 | 1 | 0 | 1 | 0 | hsa-miR-1908 | -0.14 | N/A | Sites in UTR |
| ELOVL7   | NM_001104558 | ELOVL fatty acid elongase 7                                                   | 0 | 0 | 0 | 0 | 1 | 0 | 0 | 1 | hsa-miR-1908 | -0.14 | N/A | Sites in UTR |
| MAP6     | NM_207577    | microtubule-associated protein 6                                              | 0 | 0 | 0 | 0 | 1 | 0 | 1 | 0 | hsa-miR-663  | -0.14 | N/A | Sites in UTR |
| FSTL4    | NM_015082    | follistatin-like 4                                                            | 0 | 0 | 0 | 0 | 1 | 0 | 1 | 0 | hsa-miR-663  | -0.14 | N/A | Sites in UTR |
| CNNM4    | NM_020184    | cyclin M4                                                                     | 0 | 0 | 0 | 0 | 1 | 0 | 1 | 0 | hsa-miR-1908 | -0.14 | N/A | Sites in UTR |



|          |              |                                                                                    |   |   |   |   |   |   |   |   |              |       |     |              |
|----------|--------------|------------------------------------------------------------------------------------|---|---|---|---|---|---|---|---|--------------|-------|-----|--------------|
| LEMD2    | NM_001143944 | LEM domain containing 2                                                            | 0 | 0 | 0 | 0 | 1 | 0 | 0 | 1 | hsa-miR-663  | -0.14 | N/A | Sites in UTR |
| B4GALT5  | NM_004776    | UDP-Gal:betaGlcNAc beta 1,4- galactosyltransferase, polypeptide 5                  | 0 | 0 | 0 | 0 | 1 | 0 | 1 | 0 | hsa-miR-1908 | -0.14 | N/A | Sites in UTR |
| KDEL2    | NM_153705    | KDEL (Lys-Asp-Glu-Leu) containing 2                                                | 0 | 0 | 0 | 0 | 1 | 0 | 1 | 0 | hsa-miR-1908 | -0.14 | N/A | Sites in UTR |
| TAF8     | NM_138572    | TAF8 RNA polymerase II, TATA box binding protein (TBP)-associated factor, 43kDa    | 0 | 0 | 0 | 0 | 1 | 0 | 0 | 1 | hsa-miR-1908 | -0.14 | N/A | Sites in UTR |
| CALHM1   | NM_001001412 | calcium homeostasis modulator 1                                                    | 0 | 0 | 0 | 0 | 1 | 0 | 0 | 1 | hsa-miR-663  | -0.14 | N/A | Sites in UTR |
| SKA2     | NM_001100595 | spindle and kinetochore associated complex subunit 2                               | 0 | 0 | 0 | 0 | 1 | 0 | 0 | 1 | hsa-miR-1908 | -0.14 | N/A | Sites in UTR |
| KCNMA1   | NM_001014797 | potassium large conductance calcium-activated channel, subfamily M, alpha member 1 | 0 | 0 | 0 | 0 | 1 | 0 | 1 | 0 | hsa-miR-1908 | -0.14 | N/A | Sites in UTR |
| PPP1R16B | NM_001172735 | protein phosphatase 1, regulatory (inhibitor) subunit 16B                          | 0 | 0 | 0 | 0 | 1 | 0 | 1 | 0 | hsa-miR-1908 | -0.14 | N/A | Sites in UTR |
| GPSM1    | NM_001145638 | G-protein signaling modulator 1                                                    | 0 | 0 | 0 | 0 | 1 | 0 | 1 | 0 | hsa-miR-1908 | -0.14 | N/A | Sites in UTR |
| WNT4     | NM_030761    | wingless-type MMTV integration site family, member 4                               | 0 | 0 | 0 | 0 | 1 | 0 | 1 | 0 | hsa-miR-1908 | -0.14 | N/A | Sites in UTR |
| SETD1B   | NM_015048    | SET domain containing 1B                                                           | 0 | 0 | 0 | 0 | 1 | 0 | 0 | 1 | hsa-miR-663  | -0.14 | N/A | Sites in UTR |
| PKD3     | NM_001142386 | pyruvate dehydrogenase kinase, isozyme 3                                           | 0 | 0 | 0 | 0 | 1 | 0 | 1 | 0 | hsa-miR-1908 | -0.13 | N/A | Sites in UTR |
| FXC1     | NM_012192    | fracture callus 1 homolog (rat)                                                    | 0 | 0 | 0 | 0 | 1 | 0 | 1 | 0 | hsa-miR-1908 | -0.13 | N/A | Sites in UTR |
| MMAB     | NM_052845    | methylmalonic aciduria (cobalamin deficiency) cblB type                            | 0 | 0 | 0 | 0 | 1 | 0 | 1 | 0 | hsa-miR-1908 | -0.13 | N/A | Sites in UTR |
| CRISPLD2 | NM_031476    | cysteine-rich secretory protein LCCL domain containing 2                           | 0 | 0 | 0 | 0 | 1 | 0 | 0 | 1 | hsa-miR-663  | -0.13 | N/A | Sites in UTR |
| SLC25A42 | NM_178526    | solute carrier family 25, member 42                                                | 0 | 0 | 0 | 0 | 1 | 0 | 0 | 1 | hsa-miR-663  | -0.13 | N/A | Sites in UTR |
| RASSF2   | NM_014737    | Ras association (RalGDS/AF-6) domain family member 2                               | 0 | 0 | 0 | 0 | 1 | 0 | 0 | 1 | hsa-miR-1908 | -0.13 | N/A | Sites in UTR |
| HDAC4    | NM_006037    | histone deacetylase 4                                                              | 0 | 0 | 0 | 0 | 1 | 0 | 1 | 0 | hsa-miR-663  | -0.13 | N/A | Sites in UTR |
| RCC2     | NM_001136204 | regulator of chromosome condensation 2                                             | 0 | 0 | 0 | 0 | 1 | 0 | 1 | 0 | hsa-miR-1908 | -0.13 | N/A | Sites in UTR |
| FOXP4    | NM_001012426 | forkhead box P4                                                                    | 0 | 0 | 0 | 0 | 1 | 0 | 1 | 0 | hsa-miR-663  | -0.13 | N/A | Sites in UTR |

|          |              |                                                                    |   |   |   |   |   |   |   |   |              |       |     |              |
|----------|--------------|--------------------------------------------------------------------|---|---|---|---|---|---|---|---|--------------|-------|-----|--------------|
| IL2RB    | NM_000878    | interleukin 2 receptor, beta                                       | 0 | 0 | 0 | 0 | 1 | 0 | 1 | 0 | hsa-miR-663  | -0.13 | N/A | Sites in UTR |
| TPPP     | NM_007030    | tubulin polymerization promoting protein                           | 0 | 0 | 0 | 0 | 1 | 0 | 1 | 0 | hsa-miR-1908 | -0.13 | N/A | Sites in UTR |
| STAC2    | NM_198993    | SH3 and cysteine rich domain 2                                     | 0 | 0 | 0 | 0 | 1 | 0 | 0 | 1 | hsa-miR-1908 | -0.13 | N/A | Sites in UTR |
| TNNI1    | NM_003281    | troponin I type 1 (skeletal, slow)                                 | 0 | 0 | 0 | 0 | 1 | 0 | 1 | 0 | hsa-miR-663  | -0.13 | N/A | Sites in UTR |
| MGLL     | NM_001003794 | monoglyceride lipase                                               | 0 | 0 | 0 | 0 | 1 | 0 | 1 | 0 | hsa-miR-1908 | -0.13 | N/A | Sites in UTR |
| FAM168B  | NM_001009993 | family with sequence similarity 168, member B                      | 0 | 0 | 0 | 0 | 1 | 0 | 1 | 0 | hsa-miR-663  | -0.13 | N/A | Sites in UTR |
| QTRTD1   | NM_024638    | queuine tRNA-ribosyltransferase domain containing 1                | 0 | 0 | 0 | 0 | 1 | 0 | 0 | 1 | hsa-miR-663  | -0.13 | N/A | Sites in UTR |
| ZNF737   | NM_001159293 | zinc finger protein 737                                            | 0 | 0 | 0 | 0 | 1 | 0 | 0 | 1 | hsa-miR-1908 | -0.13 | N/A | Sites in UTR |
| MTA1     | NM_001203258 | metastasis associated 1                                            | 0 | 0 | 0 | 0 | 1 | 0 | 1 | 0 | hsa-miR-663  | -0.13 | N/A | Sites in UTR |
| UNK      | NM_001080419 | unkempt homolog (Drosophila)                                       | 0 | 0 | 0 | 0 | 1 | 0 | 1 | 0 | hsa-miR-1908 | -0.13 | N/A | Sites in UTR |
| LBH      | NM_030915    | limb bud and heart development homolog (mouse)                     | 0 | 0 | 0 | 0 | 1 | 0 | 0 | 1 | hsa-miR-1908 | -0.13 | N/A | Sites in UTR |
| CACNA1E  | NM_000721    | calcium channel, voltage-dependent, R type, alpha 1E subunit       | 0 | 0 | 0 | 0 | 1 | 0 | 1 | 0 | hsa-miR-1908 | -0.12 | N/A | Sites in UTR |
| CD93     | NM_012072    | CD93 molecule                                                      | 0 | 0 | 0 | 0 | 1 | 0 | 1 | 0 | hsa-miR-663  | -0.12 | N/A | Sites in UTR |
| UBE2G2   | NM_001202489 | ubiquitin-conjugating enzyme E2G 2                                 | 0 | 0 | 0 | 0 | 1 | 0 | 0 | 1 | hsa-miR-663  | -0.12 | N/A | Sites in UTR |
| GMEB2    | NM_012384    | glucocorticoid modulatory element binding protein 2                | 0 | 0 | 0 | 0 | 1 | 0 | 1 | 0 | hsa-miR-1908 | -0.12 | N/A | Sites in UTR |
| NUFIP2   | NM_020772    | nuclear fragile X mental retardation protein interacting protein 2 | 0 | 0 | 0 | 0 | 1 | 0 | 0 | 1 | hsa-miR-663  | -0.12 | N/A | Sites in UTR |
| AGFG1    | NM_001135187 | ArfGAP with FG repeats 1                                           | 0 | 0 | 0 | 0 | 1 | 0 | 1 | 0 | hsa-miR-1908 | -0.12 | N/A | Sites in UTR |
| SIK2     | NM_015191    | salt-inducible kinase 2                                            | 0 | 0 | 0 | 0 | 1 | 0 | 0 | 1 | hsa-miR-1908 | -0.12 | N/A | Sites in UTR |
| KIAA0754 | NM_015038    | KIAA0754                                                           | 0 | 0 | 0 | 0 | 1 | 0 | 0 | 1 | hsa-miR-663  | -0.12 | N/A | Sites in UTR |
| EIF2C1   | NM_012199    | eukaryotic translation initiation factor 2C, 1                     | 0 | 0 | 0 | 0 | 1 | 0 | 1 | 0 | hsa-miR-663  | -0.12 | N/A | Sites in UTR |

|          |              |                                                                      |   |   |   |   |   |   |   |   |              |       |     |              |
|----------|--------------|----------------------------------------------------------------------|---|---|---|---|---|---|---|---|--------------|-------|-----|--------------|
| CLMN     | NM_024734    | calmin (calponin-like, transmembrane)                                | 0 | 0 | 0 | 0 | 1 | 0 | 1 | 0 | hsa-miR-663  | -0.12 | N/A | Sites in UTR |
| TGIF2    | NM_001199513 | TGFB-induced factor homeobox 2                                       | 0 | 0 | 0 | 0 | 1 | 0 | 0 | 1 | hsa-miR-1908 | -0.12 | N/A | Sites in UTR |
| EPB41L4A | NM_022140    | erythrocyte membrane protein band 4.1 like 4A                        | 0 | 0 | 0 | 0 | 1 | 0 | 0 | 1 | hsa-miR-1908 | -0.12 | N/A | Sites in UTR |
| HDLBP    | NM_005336    | high density lipoprotein binding protein                             | 0 | 0 | 0 | 0 | 1 | 0 | 1 | 0 | hsa-miR-1908 | -0.12 | N/A | Sites in UTR |
| VANGL1   | NM_001172411 | vang-like 1 (van gogh, Drosophila)                                   | 0 | 0 | 0 | 0 | 1 | 0 | 1 | 0 | hsa-miR-663  | -0.12 | N/A | Sites in UTR |
| PPARA    | NM_001001928 | peroxisome proliferator-activated receptor alpha                     | 0 | 0 | 0 | 0 | 1 | 0 | 0 | 1 | hsa-miR-663  | -0.12 | N/A | Sites in UTR |
| MYO10    | NM_012334    | myosin X                                                             | 0 | 0 | 0 | 0 | 1 | 1 | 0 | 0 | hsa-miR-663  | -0.12 | N/A | Sites in UTR |
| TIMP2    | NM_003255    | TIMP metalloproteinase inhibitor 2                                   | 0 | 0 | 0 | 0 | 1 | 0 | 1 | 0 | hsa-miR-663  | -0.12 | N/A | Sites in UTR |
| SLC12A6  | NM_001042494 | solute carrier family 12 (potassium/chloride transporters), member 6 | 0 | 0 | 0 | 0 | 1 | 0 | 1 | 0 | hsa-miR-1908 | -0.12 | N/A | Sites in UTR |
| FAIM2    | NM_012306    | Fas apoptotic inhibitory molecule 2                                  | 0 | 0 | 0 | 0 | 1 | 0 | 0 | 1 | hsa-miR-1908 | -0.12 | N/A | Sites in UTR |
| PTPN1    | NM_002827    | protein tyrosine phosphatase, non-receptor type 1                    | 0 | 0 | 0 | 0 | 1 | 0 | 1 | 0 | hsa-miR-1908 | -0.12 | N/A | Sites in UTR |
| CACNA1I  | NM_001003406 | calcium channel, voltage-dependent, T type, alpha 1I subunit         | 0 | 0 | 0 | 0 | 1 | 0 | 1 | 0 | hsa-miR-1908 | -0.12 | N/A | Sites in UTR |
| NAV2     | NM_001111018 | neuron navigator 2                                                   | 0 | 0 | 0 | 0 | 1 | 0 | 1 | 0 | hsa-miR-663  | -0.12 | N/A | Sites in UTR |
| TSTD2    | NM_139246    | thiosulfate sulfurtransferase (rhodanese)-like domain containing 2   | 0 | 0 | 0 | 0 | 1 | 0 | 1 | 0 | hsa-miR-1908 | -0.12 | N/A | Sites in UTR |
| GOLGA3   | NM_005895    | golgin A3                                                            | 0 | 0 | 0 | 0 | 1 | 0 | 0 | 1 | hsa-miR-1908 | -0.12 | N/A | Sites in UTR |
| SGCD     | NM_000337    | sarcoglycan, delta (35kDa dystrophin-associated glycoprotein)        | 0 | 0 | 0 | 0 | 1 | 0 | 0 | 1 | hsa-miR-663  | -0.12 | N/A | Sites in UTR |
| TOX4     | NM_014828    | TOX high mobility group box family member 4                          | 0 | 0 | 0 | 0 | 1 | 0 | 0 | 1 | hsa-miR-1908 | -0.12 | N/A | Sites in UTR |
| TOX      | NM_014729    | thymocyte selection-associated high mobility group box               | 0 | 0 | 0 | 0 | 1 | 0 | 1 | 0 | hsa-miR-663  | -0.11 | N/A | Sites in UTR |
| SZT2     | NM_015284    | seizure threshold 2 homolog (mouse)                                  | 0 | 0 | 0 | 0 | 1 | 0 | 1 | 0 | hsa-miR-663  | -0.11 | N/A | Sites in UTR |
| TFCP2L1  | NM_014553    | transcription factor CP2-like 1                                      | 0 | 0 | 0 | 0 | 1 | 0 | 1 | 0 | hsa-miR-1908 | -0.11 | N/A | Sites in UTR |

|          |              |                                                        |   |   |   |   |   |   |   |   |              |       |     |              |
|----------|--------------|--------------------------------------------------------|---|---|---|---|---|---|---|---|--------------|-------|-----|--------------|
| CENPN    | NM_001100624 | centromere protein N                                   | 0 | 0 | 0 | 0 | 1 | 0 | 0 | 1 | hsa-miR-663  | -0.11 | N/A | Sites in UTR |
| ANAPC16  | NM_001242546 | anaphase promoting complex subunit 16                  | 0 | 0 | 0 | 0 | 1 | 0 | 0 | 1 | hsa-miR-1908 | -0.11 | N/A | Sites in UTR |
| BCDIN3D  | NM_181708    | BCDIN3 domain containing                               | 0 | 0 | 0 | 0 | 1 | 0 | 0 | 1 | hsa-miR-663  | -0.11 | N/A | Sites in UTR |
| KANK2    | NM_001136191 | KN motif and ankyrin repeat domains 2                  | 0 | 0 | 0 | 0 | 1 | 0 | 1 | 0 | hsa-miR-663  | -0.11 | N/A | Sites in UTR |
| C1orf183 | NM_019099    | chromosome 1 open reading frame 183                    | 0 | 0 | 0 | 0 | 1 | 0 | 1 | 0 | hsa-miR-663  | -0.11 | N/A | Sites in UTR |
| JAK3     | NM_000215    | Janus kinase 3                                         | 0 | 0 | 0 | 0 | 1 | 0 | 0 | 1 | hsa-miR-663  | -0.11 | N/A | Sites in UTR |
| ARHGAP35 | NM_004491    | Rho GTPase activating protein 35                       | 0 | 0 | 0 | 0 | 1 | 0 | 1 | 0 | hsa-miR-1908 | -0.11 | N/A | Sites in UTR |
| PDPK1    | NM_002613    | 3-phosphoinositide dependent protein kinase-1          | 0 | 0 | 0 | 0 | 1 | 0 | 1 | 0 | hsa-miR-663  | -0.11 | N/A | Sites in UTR |
| LPHN1    | NM_001008701 | latrophilin 1                                          | 0 | 0 | 0 | 0 | 1 | 0 | 1 | 0 | hsa-miR-1908 | -0.11 | N/A | Sites in UTR |
| TAPBP    | NM_003190    | TAP binding protein (tapasin)                          | 0 | 0 | 0 | 0 | 1 | 0 | 0 | 1 | hsa-miR-1908 | -0.11 | N/A | Sites in UTR |
| MTPAP    | NM_018109    | mitochondrial poly(A) polymerase                       | 0 | 0 | 0 | 0 | 1 | 0 | 0 | 1 | hsa-miR-1908 | -0.11 | N/A | Sites in UTR |
| ZNF662   | NM_001134656 | zinc finger protein 662                                | 0 | 0 | 0 | 0 | 1 | 0 | 0 | 1 | hsa-miR-1908 | -0.11 | N/A | Sites in UTR |
| C10orf54 | NM_022153    | chromosome 10 open reading frame 54                    | 0 | 0 | 0 | 0 | 1 | 0 | 1 | 0 | hsa-miR-1908 | -0.11 | N/A | Sites in UTR |
| C6orf106 | NM_022758    | chromosome 6 open reading frame 106                    | 0 | 0 | 0 | 0 | 1 | 0 | 1 | 0 | hsa-miR-1908 | -0.11 | N/A | Sites in UTR |
| MYT1L    | NM_015025    | myelin transcription factor 1-like                     | 0 | 0 | 0 | 0 | 1 | 0 | 1 | 0 | hsa-miR-663  | -0.11 | N/A | Sites in UTR |
| C6orf138 | NM_207499    | chromosome 6 open reading frame 138                    | 0 | 0 | 0 | 0 | 1 | 0 | 0 | 1 | hsa-miR-663  | -0.11 | N/A | Sites in UTR |
| KIAA1715 | NM_030650    | KIAA1715                                               | 0 | 0 | 0 | 0 | 1 | 0 | 0 | 1 | hsa-miR-663  | -0.11 | N/A | Sites in UTR |
| CNP      | NM_033133    | 2',3'-cyclic nucleotide 3' phosphodiesterase           | 1 | 0 | 1 | 0 | 0 | 0 | 0 | 0 | hsa-miR-663  | -0.1  | N/A | Sites in UTR |
| TRIM59   | NM_173084    | tripartite motif containing 59                         | 0 | 0 | 0 | 0 | 1 | 0 | 1 | 0 | hsa-miR-1908 | -0.1  | N/A | Sites in UTR |
| REXO1L1  | NM_172239    | REX1, RNA exonuclease 1 homolog (S. cerevisiae)-like 1 | 0 | 0 | 0 | 0 | 1 | 0 | 1 | 0 | hsa-miR-663  | -0.1  | N/A | Sites in UTR |

|          |              |                                                                                |   |   |   |   |   |   |   |   |              |       |     |              |
|----------|--------------|--------------------------------------------------------------------------------|---|---|---|---|---|---|---|---|--------------|-------|-----|--------------|
| FUT1     | NM_000148    | fucosyltransferase 1 (galactoside 2-alpha-L-fucosyltransferase, H blood group) | 0 | 0 | 0 | 0 | 1 | 0 | 0 | 1 | hsa-miR-663  | -0.1  | N/A | Sites in UTR |
| 6-Mar    | NM_005885    | membrane-associated ring finger (C3HC4) 6                                      | 0 | 0 | 0 | 0 | 1 | 0 | 1 | 0 | hsa-miR-1908 | -0.1  | N/A | Sites in UTR |
| RRP7A    | NM_015703    | ribosomal RNA processing 7 homolog A ( <i>S. cerevisiae</i> )                  | 0 | 0 | 0 | 0 | 1 | 0 | 1 | 0 | hsa-miR-1908 | -0.1  | N/A | Sites in UTR |
| SH3BP2   | NM_001122681 | SH3-domain binding protein 2                                                   | 0 | 0 | 0 | 0 | 2 | 0 | 1 | 1 | hsa-miR-1908 | -0.1  | N/A | Sites in UTR |
| IRAK3    | NM_001142523 | interleukin-1 receptor-associated kinase 3                                     | 0 | 0 | 0 | 0 | 1 | 0 | 0 | 1 | hsa-miR-663  | -0.1  | N/A | Sites in UTR |
| DNAL1    | NM_001201366 | dynein, axonemal, light chain 1                                                | 0 | 0 | 0 | 0 | 1 | 0 | 0 | 1 | hsa-miR-1908 | -0.1  | N/A | Sites in UTR |
| SH3PXD2A | NM_014631    | SH3 and PX domains 2A                                                          | 0 | 0 | 0 | 0 | 1 | 0 | 1 | 0 | hsa-miR-1908 | -0.1  | N/A | Sites in UTR |
| N4BP1    | NM_153029    | NEDD4 binding protein 1                                                        | 0 | 0 | 0 | 0 | 1 | 0 | 1 | 0 | hsa-miR-663  | -0.1  | N/A | Sites in UTR |
| FAM131B  | NM_001031690 | family with sequence similarity 131, member B                                  | 0 | 0 | 0 | 0 | 1 | 0 | 0 | 1 | hsa-miR-1908 | -0.1  | N/A | Sites in UTR |
| SYT15    | NM_031912    | synaptotagmin XV                                                               | 0 | 0 | 0 | 0 | 1 | 0 | 0 | 1 | hsa-miR-1908 | -0.1  | N/A | Sites in UTR |
| GSK3B    | NM_001146156 | glycogen synthase kinase 3 beta                                                | 0 | 0 | 0 | 0 | 1 | 0 | 0 | 1 | hsa-miR-1908 | -0.1  | N/A | Sites in UTR |
| ZNF562   | NM_001130031 | zinc finger protein 562                                                        | 0 | 0 | 0 | 0 | 1 | 0 | 1 | 0 | hsa-miR-663  | -0.1  | N/A | Sites in UTR |
| KCNAB2   | NM_001199860 | potassium voltage-gated channel, shaker-related subfamily, beta member 2       | 0 | 0 | 0 | 0 | 2 | 0 | 1 | 1 | hsa-miR-1908 | -0.1  | N/A | Sites in UTR |
| SLC35E2  | NM_182838    | solute carrier family 35, member E2                                            | 0 | 0 | 0 | 0 | 1 | 0 | 0 | 1 | hsa-miR-1908 | -0.1  | N/A | Sites in UTR |
| ZNF701   | NM_001172655 | zinc finger protein 701                                                        | 0 | 0 | 0 | 0 | 2 | 0 | 2 | 0 | hsa-miR-1908 | -0.09 | N/A | Sites in UTR |
| BTBD3    | NM_014962    | BTB (POZ) domain containing 3                                                  | 0 | 0 | 0 | 0 | 1 | 0 | 1 | 0 | hsa-miR-1908 | -0.09 | N/A | Sites in UTR |
| FAM20B   | NM_014864    | family with sequence similarity 20, member B                                   | 0 | 0 | 0 | 0 | 1 | 0 | 0 | 1 | hsa-miR-1908 | -0.09 | N/A | Sites in UTR |
| HIC2     | NM_015094    | hypermethylated in cancer 2                                                    | 0 | 0 | 0 | 0 | 1 | 0 | 1 | 0 | hsa-miR-1908 | -0.09 | N/A | Sites in UTR |
| MIDN     | NM_177401    | midnolin                                                                       | 0 | 0 | 0 | 0 | 1 | 0 | 1 | 0 | hsa-miR-663  | -0.09 | N/A | Sites in UTR |
| SHISA6   | NM_001173461 | shisa homolog 6 ( <i>Xenopus laevis</i> )                                      | 0 | 0 | 0 | 0 | 1 | 0 | 1 | 0 | hsa-miR-1908 | -0.09 | N/A | Sites in UTR |

|            |              |                                                                               |   |   |   |   |   |   |   |   |              |       |     |              |
|------------|--------------|-------------------------------------------------------------------------------|---|---|---|---|---|---|---|---|--------------|-------|-----|--------------|
| MCC        | NM_001085377 | mutated in colorectal cancers                                                 | 0 | 0 | 0 | 0 | 1 | 0 | 0 | 1 | hsa-miR-1908 | -0.09 | N/A | Sites in UTR |
| PTGIS      | NM_000961    | prostaglandin I2 (prostacyclin) synthase                                      | 0 | 0 | 0 | 0 | 1 | 0 | 0 | 1 | hsa-miR-663  | -0.09 | N/A | Sites in UTR |
| WDR37      | NM_014023    | WD repeat domain 37                                                           | 0 | 0 | 0 | 0 | 1 | 0 | 0 | 1 | hsa-miR-1908 | -0.09 | N/A | Sites in UTR |
| TEAD1      | NM_021961    | TEA domain family member 1 (SV40 transcriptional enhancer factor)             | 0 | 0 | 0 | 0 | 1 | 0 | 1 | 0 | hsa-miR-1908 | -0.09 | N/A | Sites in UTR |
| CECR6      | NM_001163079 | cat eye syndrome chromosome region, candidate 6                               | 0 | 0 | 0 | 0 | 1 | 0 | 1 | 0 | hsa-miR-1908 | -0.09 | N/A | Sites in UTR |
| SHANK2     | NM_012309    | SH3 and multiple ankyrin repeat domains 2                                     | 0 | 0 | 0 | 0 | 1 | 0 | 1 | 0 | hsa-miR-1908 | -0.09 | N/A | Sites in UTR |
| TULP4      | NM_001007466 | tubby like protein 4                                                          | 0 | 0 | 0 | 0 | 1 | 0 | 0 | 1 | hsa-miR-1908 | -0.09 | N/A | Sites in UTR |
| PLEKHG2    | NM_022835    | pleckstrin homology domain containing, family G (with RhoGef domain) member 2 | 0 | 0 | 0 | 0 | 1 | 0 | 0 | 1 | hsa-miR-1908 | -0.09 | N/A | Sites in UTR |
| FAM53B     | NM_014661    | family with sequence similarity 53, member B                                  | 0 | 0 | 0 | 0 | 1 | 0 | 1 | 0 | hsa-miR-1908 | -0.09 | N/A | Sites in UTR |
| TECPR2     | NM_014844    | tectonin beta-propeller repeat containing 2                                   | 0 | 0 | 0 | 0 | 1 | 0 | 1 | 0 | hsa-miR-1908 | -0.09 | N/A | Sites in UTR |
| C17orf72   | NM_001164257 | chromosome 17 open reading frame 72                                           | 0 | 0 | 0 | 0 | 1 | 0 | 1 | 0 | hsa-miR-663  | -0.09 | N/A | Sites in UTR |
| C1orf226   | NM_001085375 | chromosome 1 open reading frame 226                                           | 0 | 0 | 0 | 0 | 1 | 0 | 1 | 0 | hsa-miR-663  | -0.09 | N/A | Sites in UTR |
| SCAI       | NM_001144877 | suppressor of cancer cell invasion                                            | 0 | 0 | 0 | 0 | 1 | 0 | 0 | 1 | hsa-miR-1908 | -0.09 | N/A | Sites in UTR |
| RNF169     | NM_001098638 | ring finger protein 169                                                       | 0 | 0 | 0 | 0 | 1 | 0 | 1 | 0 | hsa-miR-1908 | -0.09 | N/A | Sites in UTR |
| RAB43      | NM_001204883 | RAB43, member RAS oncogene family                                             | 0 | 0 | 0 | 0 | 1 | 0 | 1 | 0 | hsa-miR-1908 | -0.09 | N/A | Sites in UTR |
| ISY1-RAB43 | NM_001204890 | ISY1-RAB43 readthrough                                                        | 0 | 0 | 0 | 0 | 1 | 0 | 1 | 0 | hsa-miR-1908 | -0.09 | N/A | Sites in UTR |
| KIAA0513   | NM_014732    | KIAA0513                                                                      | 0 | 0 | 0 | 0 | 1 | 0 | 1 | 0 | hsa-miR-663  | -0.09 | N/A | Sites in UTR |
| GDF11      | NM_005811    | growth differentiation factor 11                                              | 1 | 0 | 0 | 1 | 0 | 0 | 0 | 0 | hsa-miR-1908 | -0.09 | N/A | Sites in UTR |
| TOR1AIP2   | NM_022347    | torsin A interacting protein 2                                                | 0 | 0 | 0 | 0 | 1 | 0 | 0 | 1 | hsa-miR-1908 | -0.09 | N/A | Sites in UTR |
| CASP2      | NM_001224    | caspase 2, apoptosis-related cysteine peptidase                               | 0 | 0 | 0 | 0 | 1 | 0 | 0 | 1 | hsa-miR-1908 | -0.08 | N/A | Sites in UTR |

|          |              |                                                                           |   |   |   |   |   |   |   |   |              |       |     |              |
|----------|--------------|---------------------------------------------------------------------------|---|---|---|---|---|---|---|---|--------------|-------|-----|--------------|
| PHKG2    | NM_000294    | phosphorylase kinase, gamma 2 (testis)                                    | 0 | 0 | 0 | 0 | 1 | 0 | 0 | 1 | hsa-miR-663  | -0.08 | N/A | Sites in UTR |
| DNAJC21  | NM_001012339 | Dnaj (Hsp40) homolog, subfamily C, member 21                              | 0 | 0 | 0 | 0 | 1 | 0 | 0 | 1 | hsa-miR-663  | -0.08 | N/A | Sites in UTR |
| PIP4K2B  | NM_003559    | phosphatidylinositol-5-phosphate 4-kinase, type II, beta                  | 0 | 0 | 0 | 0 | 1 | 0 | 0 | 1 | hsa-miR-1908 | -0.08 | N/A | Sites in UTR |
| TSPAN18  | NM_130783    | tetraspanin 18                                                            | 0 | 0 | 0 | 0 | 1 | 0 | 0 | 1 | hsa-miR-1908 | -0.08 | N/A | Sites in UTR |
| AHRR     | NM_001242412 | aryl-hydrocarbon receptor repressor                                       | 0 | 0 | 0 | 0 | 1 | 0 | 1 | 0 | hsa-miR-663  | -0.08 | N/A | Sites in UTR |
| MAU2     | NM_015329    | MAU2 chromatid cohesion factor homolog (C. elegans)                       | 0 | 0 | 0 | 0 | 1 | 0 | 1 | 0 | hsa-miR-1908 | -0.08 | N/A | Sites in UTR |
| HTT      | NM_002111    | huntingtin                                                                | 0 | 0 | 0 | 0 | 1 | 0 | 0 | 1 | hsa-miR-1908 | -0.08 | N/A | Sites in UTR |
| IGFBP5   | NM_000599    | insulin-like growth factor binding protein 5                              | 0 | 0 | 0 | 0 | 1 | 0 | 0 | 1 | hsa-miR-1908 | -0.08 | N/A | Sites in UTR |
| YAF2     | NM_001190980 | YY1 associated factor 2                                                   | 0 | 0 | 0 | 0 | 1 | 0 | 0 | 1 | hsa-miR-1908 | -0.08 | N/A | Sites in UTR |
| SHISA7   | NM_001145176 | shisa homolog 7 (Xenopus laevis)                                          | 0 | 0 | 0 | 0 | 1 | 0 | 0 | 1 | hsa-miR-1908 | -0.08 | N/A | Sites in UTR |
| SLC6A6   | NM_001134367 | solute carrier family 6 (neurotransmitter transporter, taurine), member 6 | 0 | 0 | 0 | 0 | 1 | 0 | 1 | 0 | hsa-miR-1908 | -0.08 | N/A | Sites in UTR |
| MUC20    | NM_001098516 | mucin 20, cell surface associated                                         | 0 | 0 | 0 | 0 | 1 | 0 | 0 | 1 | hsa-miR-663  | -0.08 | N/A | Sites in UTR |
| KDM2A    | NM_012308    | lysine (K)-specific demethylase 2A                                        | 0 | 0 | 0 | 0 | 1 | 0 | 1 | 0 | hsa-miR-663  | -0.08 | N/A | Sites in UTR |
| FAM22D   | NM_001009610 | family with sequence similarity 22, member D                              | 0 | 0 | 0 | 0 | 1 | 0 | 1 | 0 | hsa-miR-1908 | -0.08 | N/A | Sites in UTR |
| INPP4A   | NM_001134224 | inositol polyphosphate-4-phosphatase, type I, 107kDa                      | 0 | 0 | 0 | 0 | 1 | 0 | 0 | 1 | hsa-miR-663  | -0.08 | N/A | Sites in UTR |
| SMAD4    | NM_005359    | SMAD family member 4                                                      | 0 | 0 | 0 | 0 | 1 | 0 | 0 | 1 | hsa-miR-1908 | -0.08 | N/A | Sites in UTR |
| SNPH     | NM_014723    | syntaphilin                                                               | 0 | 0 | 0 | 0 | 1 | 0 | 1 | 0 | hsa-miR-1908 | -0.08 | N/A | Sites in UTR |
| SH3PXD2B | NM_001017995 | SH3 and PX domains 2B                                                     | 0 | 0 | 0 | 0 | 2 | 0 | 2 | 0 | hsa-miR-1908 | -0.08 | N/A | Sites in UTR |
| ADARB2   | NM_018702    | adenosine deaminase, RNA-specific, B2                                     | 0 | 0 | 0 | 0 | 1 | 0 | 1 | 0 | hsa-miR-1908 | -0.08 | N/A | Sites in UTR |
| FYTTD1   | NM_001011537 | forty-two-three domain containing 1                                       | 0 | 0 | 0 | 0 | 1 | 0 | 0 | 1 | hsa-miR-663  | -0.08 | N/A | Sites in UTR |

|         |              |                                                                                    |   |   |   |   |   |   |   |   |              |       |     |              |
|---------|--------------|------------------------------------------------------------------------------------|---|---|---|---|---|---|---|---|--------------|-------|-----|--------------|
| RRP15   | NM_016052    | ribosomal RNA processing 15 homolog ( <i>S. cerevisiae</i> )                       | 0 | 0 | 0 | 0 | 1 | 0 | 1 | 0 | hsa-miR-1908 | -0.07 | N/A | Sites in UTR |
| TMCC3   | NM_020698    | transmembrane and coiled-coil domain family 3                                      | 0 | 0 | 0 | 0 | 1 | 0 | 0 | 1 | hsa-miR-663  | -0.07 | N/A | Sites in UTR |
| ADCY9   | NM_001116    | adenylate cyclase 9                                                                | 0 | 0 | 0 | 0 | 1 | 0 | 0 | 1 | hsa-miR-1908 | -0.07 | N/A | Sites in UTR |
| ACSL6   | NM_001009185 | acyl-CoA synthetase long-chain family member 6                                     | 0 | 0 | 0 | 0 | 1 | 0 | 0 | 1 | hsa-miR-663  | -0.07 | N/A | Sites in UTR |
| ACAP2   | NM_012287    | ArfGAP with coiled-coil, ankyrin repeat and PH domains 2                           | 0 | 0 | 0 | 0 | 1 | 0 | 0 | 1 | hsa-miR-663  | -0.07 | N/A | Sites in UTR |
| CBFA2T2 | NM_001032999 | core-binding factor, runt domain, alpha subunit 2; translocated to, 2              | 0 | 0 | 0 | 0 | 1 | 0 | 0 | 1 | hsa-miR-1908 | -0.07 | N/A | Sites in UTR |
| RNF216  | NM_207111    | ring finger protein 216                                                            | 0 | 0 | 0 | 0 | 1 | 0 | 0 | 1 | hsa-miR-663  | -0.07 | N/A | Sites in UTR |
| TMEM33  | NM_018126    | transmembrane protein 33                                                           | 0 | 0 | 0 | 0 | 1 | 0 | 0 | 1 | hsa-miR-663  | -0.07 | N/A | Sites in UTR |
| APOOL   | NM_198450    | apolipoprotein O-like                                                              | 0 | 0 | 0 | 0 | 1 | 0 | 0 | 1 | hsa-miR-1908 | -0.07 | N/A | Sites in UTR |
| FZR1    | NM_001136197 | fizzy/cell division cycle 20 related 1 ( <i>Drosophila</i> )                       | 0 | 0 | 0 | 0 | 1 | 0 | 1 | 0 | hsa-miR-663  | -0.07 | N/A | Sites in UTR |
| ZNF555  | NM_001172775 | zinc finger protein 555                                                            | 0 | 0 | 0 | 0 | 1 | 0 | 1 | 0 | hsa-miR-663  | -0.07 | N/A | Sites in UTR |
| MLL     | NM_001197104 | myeloid/lymphoid or mixed-lineage leukemia (trithorax homolog, <i>Drosophila</i> ) | 0 | 0 | 0 | 0 | 1 | 0 | 0 | 1 | hsa-miR-663  | -0.07 | N/A | Sites in UTR |
| ST8SIA2 | NM_006011    | ST8 alpha-N-acetyl-neuraminide alpha-2,8-sialyltransferase 2                       | 0 | 0 | 0 | 0 | 1 | 0 | 0 | 1 | hsa-miR-663  | -0.07 | N/A | Sites in UTR |
| GATAD2B | NM_020699    | GATA zinc finger domain containing 2B                                              | 0 | 0 | 0 | 0 | 1 | 0 | 1 | 0 | hsa-miR-663  | -0.07 | N/A | Sites in UTR |
| ABR     | NM_001092    | active BCR-related gene                                                            | 0 | 0 | 0 | 0 | 1 | 0 | 0 | 1 | hsa-miR-663  | -0.07 | N/A | Sites in UTR |
| GNG4    | NM_001098721 | guanine nucleotide binding protein (G protein), gamma 4                            | 0 | 0 | 0 | 0 | 1 | 0 | 0 | 1 | hsa-miR-1908 | -0.07 | N/A | Sites in UTR |
| NFAM1   | NM_145912    | NFAT activating protein with ITAM motif 1                                          | 0 | 0 | 0 | 0 | 2 | 0 | 2 | 0 | hsa-miR-1908 | -0.07 | N/A | Sites in UTR |
| ZNF805  | NM_001023563 | zinc finger protein 805                                                            | 0 | 0 | 0 | 0 | 1 | 0 | 0 | 1 | hsa-miR-1908 | -0.07 | N/A | Sites in UTR |
| SLC1A2  | NM_001195728 | solute carrier family 1 (glial high affinity glutamate transporter), member 2      | 0 | 0 | 0 | 0 | 1 | 0 | 0 | 1 | hsa-miR-1908 | -0.07 | N/A | Sites in UTR |
| TFDP2   | NM_001178138 | transcription factor Dp-2 (E2F dimerization partner 2)                             | 0 | 0 | 0 | 0 | 1 | 0 | 0 | 1 | hsa-miR-1908 | -0.07 | N/A | Sites in UTR |



|         |              |                                                                                |   |   |   |   |   |   |   |   |              |       |     |              |
|---------|--------------|--------------------------------------------------------------------------------|---|---|---|---|---|---|---|---|--------------|-------|-----|--------------|
| SCD     | NM_005063    | stearoyl-CoA desaturase (delta-9-desaturase)                                   | 0 | 0 | 0 | 0 | 1 | 0 | 1 | 0 | hsa-miR-663  | -0.06 | N/A | Sites in UTR |
| MESDC2  | NM_015154    | mesoderm development candidate 2                                               | 0 | 0 | 0 | 0 | 1 | 0 | 1 | 0 | hsa-miR-1908 | -0.06 | N/A | Sites in UTR |
| IRGQ    | NM_001007561 | immunity-related GTPase family, Q                                              | 0 | 0 | 0 | 0 | 1 | 0 | 0 | 1 | hsa-miR-1908 | -0.06 | N/A | Sites in UTR |
| MEF2D   | NM_005920    | myocyte enhancer factor 2D                                                     | 0 | 0 | 0 | 0 | 1 | 0 | 1 | 0 | hsa-miR-1908 | -0.06 | N/A | Sites in UTR |
| FMNL3   | NM_175736    | formin-like 3                                                                  | 0 | 0 | 0 | 0 | 1 | 0 | 1 | 0 | hsa-miR-663  | -0.06 | N/A | Sites in UTR |
| CALML4  | NM_001031733 | calmodulin-like 4                                                              | 0 | 0 | 0 | 0 | 1 | 0 | 1 | 0 | hsa-miR-1908 | -0.06 | N/A | Sites in UTR |
| ELFN2   | NM_052906    | extracellular leucine-rich repeat and fibronectin type III domain containing 2 | 0 | 0 | 0 | 0 | 1 | 0 | 1 | 0 | hsa-miR-663  | -0.06 | N/A | Sites in UTR |
| ZNF264  | NM_003417    | zinc finger protein 264                                                        | 0 | 0 | 0 | 0 | 1 | 0 | 0 | 1 | hsa-miR-1908 | -0.06 | N/A | Sites in UTR |
| HOK3    | NM_032410    | hook homolog 3 (Drosophila)                                                    | 0 | 0 | 0 | 0 | 1 | 0 | 0 | 1 | hsa-miR-663  | -0.06 | N/A | Sites in UTR |
| STEAP2  | NM_001040665 | six transmembrane epithelial antigen of the prostate 2                         | 0 | 0 | 0 | 0 | 1 | 0 | 0 | 1 | hsa-miR-1908 | -0.06 | N/A | Sites in UTR |
| ORAI2   | NM_001126340 | ORAI calcium release-activated calcium modulator 2                             | 0 | 0 | 0 | 0 | 1 | 0 | 1 | 0 | hsa-miR-1908 | -0.06 | N/A | Sites in UTR |
| TBC1D15 | NM_001146213 | TBC1 domain family, member 15                                                  | 0 | 0 | 0 | 0 | 1 | 0 | 0 | 1 | hsa-miR-663  | -0.06 | N/A | Sites in UTR |
| PGAP1   | NM_024989    | post-GPI attachment to proteins 1                                              | 0 | 0 | 0 | 0 | 1 | 0 | 0 | 1 | hsa-miR-1908 | -0.06 | N/A | Sites in UTR |
| MMS22L  | NM_198468    | MMS22-like, DNA repair protein                                                 | 0 | 0 | 0 | 0 | 1 | 0 | 0 | 1 | hsa-miR-1908 | -0.06 | N/A | Sites in UTR |
| SC5DL   | NM_001024956 | sterol-C5-desaturase (ERG3 delta-5-desaturase homolog, S. cerevisiae)-like     | 0 | 0 | 0 | 0 | 1 | 0 | 0 | 1 | hsa-miR-1908 | -0.06 | N/A | Sites in UTR |
| ESR1    | NM_000125    | estrogen receptor 1                                                            | 0 | 0 | 0 | 0 | 1 | 0 | 1 | 0 | hsa-miR-663  | -0.06 | N/A | Sites in UTR |
| STK17B  | NM_004226    | serine/threonine kinase 17b                                                    | 0 | 0 | 0 | 0 | 1 | 0 | 1 | 0 | hsa-miR-663  | -0.06 | N/A | Sites in UTR |
| PAK2    | NM_002577    | p21 protein (Cdc42/Rac)-activated kinase 2                                     | 0 | 0 | 0 | 0 | 1 | 0 | 0 | 1 | hsa-miR-1908 | -0.06 | N/A | Sites in UTR |
| CYCS    | NM_018947    | cytochrome c, somatic                                                          | 0 | 0 | 0 | 0 | 1 | 0 | 0 | 1 | hsa-miR-1908 | -0.06 | N/A | Sites in UTR |
| ZNF780B | NM_001005851 | zinc finger protein 780B                                                       | 0 | 0 | 0 | 0 | 1 | 0 | 0 | 1 | hsa-miR-663  | -0.06 | N/A | Sites in UTR |

|         |              |                                                                 |   |   |   |   |   |   |   |   |              |       |     |              |
|---------|--------------|-----------------------------------------------------------------|---|---|---|---|---|---|---|---|--------------|-------|-----|--------------|
| TRAF6   | NM_004620    | TNF receptor-associated factor 6                                | 0 | 0 | 0 | 0 | 1 | 0 | 0 | 1 | hsa-miR-1908 | -0.06 | N/A | Sites in UTR |
| CASB    | NM_007220    | carbonic anhydrase VB, mitochondrial                            | 0 | 0 | 0 | 0 | 1 | 0 | 0 | 1 | hsa-miR-663  | -0.06 | N/A | Sites in UTR |
| ICK     | NM_014920    | intestinal cell (MAK-like) kinase                               | 0 | 0 | 0 | 0 | 1 | 0 | 0 | 1 | hsa-miR-663  | -0.06 | N/A | Sites in UTR |
| GNL3L   | NM_001184819 | guanine nucleotide binding protein-like 3 (nucleolar)-like      | 0 | 0 | 0 | 0 | 1 | 0 | 0 | 1 | hsa-miR-1908 | -0.05 | N/A | Sites in UTR |
| CBL     | NM_005188    | Cas-Br-M (murine) ecotropic retroviral transforming sequence    | 0 | 0 | 0 | 0 | 1 | 0 | 1 | 0 | hsa-miR-1908 | -0.05 | N/A | Sites in UTR |
| SFMBT2  | NM_001018039 | Scm-like with four mbt domains 2                                | 0 | 0 | 0 | 0 | 1 | 0 | 0 | 1 | hsa-miR-1908 | -0.05 | N/A | Sites in UTR |
| FAM18B2 | NM_001135036 | family with sequence similarity 18, member B2                   | 0 | 0 | 0 | 0 | 1 | 0 | 0 | 1 | hsa-miR-1908 | -0.05 | N/A | Sites in UTR |
| GRAMD4  | NM_015124    | GRAM domain containing 4                                        | 0 | 0 | 0 | 0 | 1 | 0 | 1 | 0 | hsa-miR-663  | -0.05 | N/A | Sites in UTR |
| RBFA    | NM_001171967 | ribosome binding factor A (putative)                            | 0 | 0 | 0 | 0 | 1 | 0 | 1 | 0 | hsa-miR-1908 | -0.05 | N/A | Sites in UTR |
| KCTD12  | NM_138444    | potassium channel tetramerisation domain containing 12          | 0 | 0 | 0 | 0 | 1 | 0 | 1 | 0 | hsa-miR-663  | -0.05 | N/A | Sites in UTR |
| LHFPL4  | NM_198560    | lipoma HMGIC fusion partner-like 4                              | 0 | 0 | 0 | 0 | 1 | 0 | 1 | 0 | hsa-miR-663  | -0.05 | N/A | Sites in UTR |
| RPL27A  | NM_000990    | ribosomal protein L27a                                          | 0 | 0 | 0 | 0 | 1 | 0 | 0 | 1 | hsa-miR-663  | -0.05 | N/A | Sites in UTR |
| HIPK2   | NM_001113239 | homeodomain interacting protein kinase 2                        | 0 | 0 | 0 | 0 | 2 | 0 | 2 | 0 | hsa-miR-663  | -0.05 | N/A | Sites in UTR |
| ST6GAL2 | NM_001142351 | ST6 beta-galactosamide alpha-2,6-sialyltransferase 2            | 0 | 0 | 0 | 0 | 1 | 0 | 0 | 1 | hsa-miR-663  | -0.05 | N/A | Sites in UTR |
| LPP     | NM_001167671 | LIM domain containing preferred translocation partner in lipoma | 0 | 0 | 0 | 0 | 1 | 0 | 0 | 1 | hsa-miR-1908 | -0.05 | N/A | Sites in UTR |
| FBXL20  | NM_001184906 | F-box and leucine-rich repeat protein 20                        | 0 | 0 | 0 | 0 | 1 | 0 | 0 | 1 | hsa-miR-663  | -0.05 | N/A | Sites in UTR |
| QKI     | NM_006775    | quaking homolog, KH domain RNA binding (mouse)                  | 0 | 0 | 0 | 0 | 1 | 0 | 1 | 0 | hsa-miR-663  | -0.04 | N/A | Sites in UTR |
| ZDHHC20 | NM_153251    | zinc finger, DHHC-type containing 20                            | 0 | 0 | 0 | 0 | 1 | 0 | 1 | 0 | hsa-miR-663  | -0.04 | N/A | Sites in UTR |
| MRAS    | NM_001085049 | muscle RAS oncogene homolog                                     | 0 | 0 | 0 | 0 | 1 | 0 | 1 | 0 | hsa-miR-1908 | -0.04 | N/A | Sites in UTR |
| KY      | NM_178554    | kyphoscoliosis peptidase                                        | 0 | 0 | 0 | 0 | 1 | 0 | 1 | 0 | hsa-miR-1908 | -0.04 | N/A | Sites in UTR |

|          |              |                                                                                  |   |   |   |   |   |   |   |   |              |         |     |              |
|----------|--------------|----------------------------------------------------------------------------------|---|---|---|---|---|---|---|---|--------------|---------|-----|--------------|
| ZNF652   | NM_001145365 | zinc finger protein 652                                                          | 0 | 0 | 0 | 0 | 1 | 0 | 1 | 0 | hsa-miR-663  | -0.04   | N/A | Sites in UTR |
| ZNF250   | NM_001109689 | zinc finger protein 250                                                          | 0 | 0 | 0 | 0 | 1 | 0 | 1 | 0 | hsa-miR-663  | -0.04   | N/A | Sites in UTR |
| TUSC5    | NM_172367    | tumor suppressor candidate 5                                                     | 0 | 0 | 0 | 0 | 1 | 0 | 1 | 0 | hsa-miR-1908 | -0.04   | N/A | Sites in UTR |
| PCDH19   | NM_001105243 | protocadherin 19                                                                 | 0 | 0 | 0 | 0 | 1 | 0 | 1 | 0 | hsa-miR-1908 | -0.03   | N/A | Sites in UTR |
| SOX12    | NM_006943    | SRY (sex determining region Y)-box 12                                            | 1 | 0 | 1 | 0 | 0 | 0 | 0 | 0 | hsa-miR-1908 | -0.03   | N/A | Sites in UTR |
| BTBD9    | NM_001099272 | BTB (POZ) domain containing 9                                                    | 0 | 0 | 0 | 0 | 1 | 0 | 1 | 0 | hsa-miR-1908 | -0.03   | N/A | Sites in UTR |
| SLC7A5   | NM_003486    | solute carrier family 7 (amino acid transporter light chain, L system), member 5 | 0 | 0 | 0 | 0 | 1 | 0 | 1 | 0 | hsa-miR-663  | -0.03   | N/A | Sites in UTR |
| NPTX1    | NM_002522    | neuronal pentraxin I                                                             | 0 | 0 | 0 | 0 | 1 | 0 | 1 | 0 | hsa-miR-663  | -0.03   | N/A | Sites in UTR |
| FAM101B  | NM_182705    | family with sequence similarity 101, member B                                    | 0 | 0 | 0 | 0 | 1 | 0 | 0 | 1 | hsa-miR-1908 | -0.03   | N/A | Sites in UTR |
| CALN1    | NM_001017440 | calneuron 1                                                                      | 0 | 0 | 0 | 0 | 2 | 0 | 1 | 1 | hsa-miR-1908 | > -0.02 | N/A | Sites in UTR |
| METTL21A | NM_001127395 | methyltransferase like 21A                                                       | 0 | 0 | 0 | 0 | 1 | 0 | 1 | 0 | hsa-miR-1908 | > -0.02 | N/A | Sites in UTR |
| ACO2     | NM_001098    | aconitase 2, mitochondrial                                                       | 0 | 0 | 0 | 0 | 1 | 0 | 1 | 0 | hsa-miR-1908 | N/A     | N/A | Sites in UTR |
| ACTN1    | NM_001102    | actinin, alpha 1                                                                 | 0 | 0 | 0 | 0 | 1 | 0 | 1 | 0 | hsa-miR-1908 | N/A     | N/A | Sites in UTR |
| ADORA1   | NM_000674    | adenosine A1 receptor                                                            | 0 | 0 | 0 | 0 | 1 | 0 | 1 | 0 | hsa-miR-1908 | N/A     | N/A | Sites in UTR |
| ALDOB    | NM_000035    | aldolase B, fructose-bisphosphate                                                | 0 | 0 | 0 | 0 | 1 | 0 | 0 | 1 | hsa-miR-1908 | N/A     | N/A | Sites in UTR |
| APP      | NM_000484    | amyloid beta (A4) precursor protein                                              | 0 | 0 | 0 | 0 | 1 | 1 | 0 | 0 | hsa-miR-1908 | N/A     | N/A | Sites in UTR |
| EPHX1    | NM_000120    | epoxide hydrolase 1, microsomal (xenobiotic)                                     | 0 | 0 | 0 | 0 | 1 | 0 | 1 | 0 | hsa-miR-1908 | N/A     | N/A | Sites in UTR |
| FECH     | NM_000140    | ferrochelatase                                                                   | 0 | 0 | 0 | 0 | 1 | 0 | 1 | 0 | hsa-miR-1908 | N/A     | N/A | Sites in UTR |
| HMX1     | NM_018942    | H6 family homeobox 1                                                             | 0 | 0 | 0 | 0 | 1 | 0 | 1 | 0 | hsa-miR-1908 | N/A     | N/A | Sites in UTR |
| HPD      | NM_001171993 | 4-hydroxyphenylpyruvate dioxygenase                                              | 1 | 0 | 1 | 0 | 0 | 0 | 0 | 0 | hsa-miR-1908 | N/A     | N/A | Sites in UTR |

|          |              |                                                                                |   |   |   |   |   |   |   |   |              |     |     |              |
|----------|--------------|--------------------------------------------------------------------------------|---|---|---|---|---|---|---|---|--------------|-----|-----|--------------|
| ITGA3    | NM_002204    | integrin, alpha 3 (antigen CD49C, alpha 3 subunit of VLA-3 receptor)           | 0 | 0 | 0 | 0 | 1 | 0 | 1 | 0 | hsa-miR-1908 | N/A | N/A | Sites in UTR |
| LAD1     | NM_005558    | ladinin 1                                                                      | 0 | 0 | 0 | 0 | 1 | 1 | 0 | 0 | hsa-miR-1908 | N/A | N/A | Sites in UTR |
| PITX3    | NM_005029    | paired-like homeodomain 3                                                      | 0 | 0 | 0 | 0 | 1 | 0 | 1 | 0 | hsa-miR-1908 | N/A | N/A | Sites in UTR |
| PPP4C    | NM_002720    | protein phosphatase 4, catalytic subunit                                       | 0 | 0 | 0 | 0 | 1 | 0 | 1 | 0 | hsa-miR-1908 | N/A | N/A | Sites in UTR |
| CLEC11A  | NM_002975    | C-type lectin domain family 11, member A                                       | 0 | 0 | 0 | 0 | 1 | 0 | 1 | 0 | hsa-miR-1908 | N/A | N/A | Sites in UTR |
| SLC7A1   | NM_003045    | solute carrier family 7 (cationic amino acid transporter, y+ system), member 1 | 0 | 0 | 0 | 0 | 1 | 0 | 1 | 0 | hsa-miR-1908 | N/A | N/A | Sites in UTR |
| STXBP2   | NM_001127396 | syntaxin binding protein 2                                                     | 0 | 0 | 0 | 0 | 1 | 0 | 1 | 0 | hsa-miR-1908 | N/A | N/A | Sites in UTR |
| TEF      | NM_001145398 | thyrotrophic embryonic factor                                                  | 0 | 0 | 0 | 0 | 1 | 0 | 1 | 0 | hsa-miR-1908 | N/A | N/A | Sites in UTR |
| TFAP2A   | NM_001032280 | transcription factor AP-2 alpha (activating enhancer binding protein 2 alpha)  | 0 | 0 | 0 | 0 | 1 | 0 | 1 | 0 | hsa-miR-1908 | N/A | N/A | Sites in UTR |
| USF2     | NM_003367    | upstream transcription factor 2, c-fos interacting                             | 0 | 0 | 0 | 0 | 1 | 0 | 0 | 1 | hsa-miR-1908 | N/A | N/A | Sites in UTR |
| BTG2     | NM_006763    | BTG family, member 2                                                           | 0 | 0 | 0 | 0 | 1 | 0 | 1 | 0 | hsa-miR-1908 | N/A | N/A | Sites in UTR |
| CST7     | NM_003650    | cystatin F (leukocystatin)                                                     | 0 | 0 | 0 | 0 | 1 | 0 | 1 | 0 | hsa-miR-1908 | N/A | N/A | Sites in UTR |
| PDXK     | NM_003681    | pyridoxal (pyridoxine, vitamin B6) kinase                                      | 0 | 0 | 0 | 0 | 1 | 0 | 1 | 0 | hsa-miR-1908 | N/A | N/A | Sites in UTR |
| PPAP2C   | NM_003712    | phosphatidic acid phosphatase type 2C                                          | 0 | 0 | 0 | 0 | 1 | 0 | 1 | 0 | hsa-miR-1908 | N/A | N/A | Sites in UTR |
| FGF18    | NM_003862    | fibroblast growth factor 18                                                    | 0 | 0 | 0 | 0 | 1 | 0 | 1 | 0 | hsa-miR-1908 | N/A | N/A | Sites in UTR |
| SLC5A6   | NM_021095    | solute carrier family 5 (sodium-dependent vitamin transporter), member 6       | 0 | 0 | 0 | 0 | 1 | 0 | 1 | 0 | hsa-miR-1908 | N/A | N/A | Sites in UTR |
| MAPK8IP1 | NM_005456    | mitogen-activated protein kinase 8 interacting protein 1                       | 0 | 0 | 0 | 0 | 1 | 0 | 1 | 0 | hsa-miR-1908 | N/A | N/A | Sites in UTR |
| SPAG7    | NM_004890    | sperm associated antigen 7                                                     | 0 | 0 | 0 | 0 | 1 | 0 | 1 | 0 | hsa-miR-1908 | N/A | N/A | Sites in UTR |
| KLF2     | NM_016270    | Kruppel-like factor 2 (lung)                                                   | 0 | 0 | 0 | 0 | 1 | 0 | 1 | 0 | hsa-miR-1908 | N/A | N/A | Sites in UTR |
| SLC2A6   | NM_001145099 | solute carrier family 2 (facilitated glucose transporter), member 6            | 0 | 0 | 0 | 0 | 1 | 0 | 1 | 0 | hsa-miR-1908 | N/A | N/A | Sites in UTR |

|          |              |                                                                   |   |   |   |   |   |   |   |   |              |     |     |              |
|----------|--------------|-------------------------------------------------------------------|---|---|---|---|---|---|---|---|--------------|-----|-----|--------------|
| PNKP     | NM_007254    | polynucleotide kinase 3'-phosphatase                              | 0 | 0 | 0 | 0 | 1 | 0 | 1 | 0 | hsa-miR-1908 | N/A | N/A | Sites in UTR |
| KDM6B    | NM_001080424 | lysine (K)-specific demethylase 6B                                | 0 | 0 | 0 | 0 | 1 | 0 | 1 | 0 | hsa-miR-1908 | N/A | N/A | Sites in UTR |
| MAFF     | NM_001161572 | v-maf musculoaponeurotic fibrosarcoma oncogene homolog F (avian)  | 0 | 0 | 0 | 0 | 1 | 1 | 0 | 0 | hsa-miR-1908 | N/A | N/A | Sites in UTR |
| TSPAN16  | NM_012466    | tetraspanin 16                                                    | 0 | 0 | 0 | 0 | 1 | 0 | 1 | 0 | hsa-miR-1908 | N/A | N/A | Sites in UTR |
| ZNF777   | NM_015694    | zinc finger protein 777                                           | 0 | 0 | 0 | 0 | 1 | 0 | 1 | 0 | hsa-miR-1908 | N/A | N/A | Sites in UTR |
| REM1     | NM_014012    | RAS (RAD and GEM)-like GTP-binding 1                              | 0 | 0 | 0 | 0 | 1 | 0 | 1 | 0 | hsa-miR-1908 | N/A | N/A | Sites in UTR |
| PADI1    | NM_013358    | peptidyl arginine deiminase, type I                               | 0 | 0 | 0 | 0 | 1 | 0 | 0 | 1 | hsa-miR-1908 | N/A | N/A | Sites in UTR |
| CALML5   | NM_017422    | calmodulin-like 5                                                 | 0 | 0 | 0 | 0 | 1 | 0 | 1 | 0 | hsa-miR-1908 | N/A | N/A | Sites in UTR |
| A4GALT   | NM_017436    | alpha 1,4-galactosyltransferase                                   | 0 | 0 | 0 | 0 | 1 | 0 | 0 | 1 | hsa-miR-1908 | N/A | N/A | Sites in UTR |
| USE1     | NM_018467    | unconventional SNARE in the ER 1 homolog ( <i>S. cerevisiae</i> ) | 0 | 0 | 0 | 0 | 1 | 0 | 1 | 0 | hsa-miR-1908 | N/A | N/A | Sites in UTR |
| IRGC     | NM_019612    | immunity-related GTPase family, cinema                            | 0 | 0 | 0 | 0 | 1 | 0 | 1 | 0 | hsa-miR-1908 | N/A | N/A | Sites in UTR |
| PHF12    | NM_001033561 | PHD finger protein 12                                             | 0 | 0 | 0 | 0 | 1 | 1 | 0 | 0 | hsa-miR-1908 | N/A | N/A | Sites in UTR |
| PDLIM2   | NM_021630    | PDZ and LIM domain 2 (mystique)                                   | 0 | 0 | 0 | 0 | 1 | 0 | 0 | 1 | hsa-miR-1908 | N/A | N/A | Sites in UTR |
| WNK2     | NM_006648    | WNK lysine deficient protein kinase 2                             | 0 | 0 | 0 | 0 | 1 | 0 | 1 | 0 | hsa-miR-1908 | N/A | N/A | Sites in UTR |
| TBC1D17  | NM_001168222 | TBC1 domain family, member 17                                     | 0 | 0 | 0 | 0 | 1 | 1 | 0 | 0 | hsa-miR-1908 | N/A | N/A | Sites in UTR |
| TRABD    | NM_025204    | TraB domain containing                                            | 0 | 0 | 0 | 0 | 1 | 0 | 1 | 0 | hsa-miR-1908 | N/A | N/A | Sites in UTR |
| AIF1L    | NM_001185095 | allograft inflammatory factor 1-like                              | 0 | 0 | 0 | 0 | 1 | 0 | 1 | 0 | hsa-miR-1908 | N/A | N/A | Sites in UTR |
| GLYR1    | NM_032569    | glyoxylate reductase 1 homolog ( <i>Arabidopsis</i> )             | 0 | 0 | 0 | 0 | 1 | 0 | 1 | 0 | hsa-miR-1908 | N/A | N/A | Sites in UTR |
| MFSD2A   | NM_001136493 | major facilitator superfamily domain containing 2A                | 0 | 0 | 0 | 0 | 1 | 0 | 0 | 1 | hsa-miR-1908 | N/A | N/A | Sites in UTR |
| KIAA1984 | NM_001039374 | KIAA1984                                                          | 0 | 0 | 0 | 0 | 1 | 0 | 1 | 0 | hsa-miR-1908 | N/A | N/A | Sites in UTR |

|          |              |                                                |   |   |   |   |   |   |   |   |              |     |     |              |
|----------|--------------|------------------------------------------------|---|---|---|---|---|---|---|---|--------------|-----|-----|--------------|
| ZNF598   | NM_178167    | zinc finger protein 598                        | 0 | 0 | 0 | 0 | 1 | 0 | 0 | 1 | hsa-miR-1908 | N/A | N/A | Sites in UTR |
| C20orf54 | NM_033409    | chromosome 20 open reading frame 54            | 0 | 0 | 0 | 0 | 1 | 0 | 1 | 0 | hsa-miR-1908 | N/A | N/A | Sites in UTR |
| SLC25A29 | NM_001039355 | solute carrier family 25, member 29            | 0 | 0 | 0 | 0 | 1 | 0 | 1 | 0 | hsa-miR-1908 | N/A | N/A | Sites in UTR |
| CCDC105  | NM_173482    | coiled-coil domain containing 105              | 0 | 0 | 0 | 0 | 1 | 0 | 1 | 0 | hsa-miR-1908 | N/A | N/A | Sites in UTR |
| LYPD2    | NM_205545    | LY6/PLAUR domain containing 2                  | 0 | 0 | 0 | 0 | 1 | 0 | 1 | 0 | hsa-miR-1908 | N/A | N/A | Sites in UTR |
| CNOT6L   | NM_144571    | CCR4-NOT transcription complex, subunit 6-like | 0 | 0 | 0 | 0 | 1 | 1 | 0 | 0 | hsa-miR-1908 | N/A | N/A | Sites in UTR |
| BEST4    | NM_153274    | bestrophin 4                                   | 0 | 0 | 0 | 0 | 1 | 0 | 1 | 0 | hsa-miR-1908 | N/A | N/A | Sites in UTR |
| CCDC57   | NM_198082    | coiled-coil domain containing 57               | 0 | 0 | 0 | 0 | 1 | 0 | 1 | 0 | hsa-miR-1908 | N/A | N/A | Sites in UTR |
| C1QL4    | NM_001008223 | complement component 1, q subcomponent-like 4  | 0 | 0 | 0 | 0 | 1 | 0 | 1 | 0 | hsa-miR-1908 | N/A | N/A | Sites in UTR |
| CLEC4G   | NM_198492    | C-type lectin domain family 4, member G        | 0 | 0 | 0 | 0 | 1 | 0 | 1 | 0 | hsa-miR-1908 | N/A | N/A | Sites in UTR |
| IFITM10  | NM_001170820 | interferon induced transmembrane protein 10    | 0 | 0 | 0 | 0 | 1 | 0 | 0 | 1 | hsa-miR-1908 | N/A | N/A | Sites in UTR |
| ODF3B    | NM_001014440 | outer dense fiber of sperm tails 3B            | 0 | 0 | 0 | 0 | 1 | 0 | 0 | 1 | hsa-miR-1908 | N/A | N/A | Sites in UTR |
| RNF208   | NM_031297    | ring finger protein 208                        | 0 | 0 | 0 | 0 | 1 | 0 | 0 | 1 | hsa-miR-1908 | N/A | N/A | Sites in UTR |
